# Supplementary material
Source: Royal Society of Chemistry journal article supplement (doi:10.1039/d6tc00514d)
Supplement: d6tc00514d1.pdf [file d6tc00514d1.pdf]

## Supporting Information

### Phenothiazine and Anthracene Derivatives as Emitters for Vacuum-Deposited and Solution-Processed Optoelectronic Devices

Ramakant Gavale<sup>a</sup>, Melika Ghasemi<sup>b</sup>, Dmytro Volyniuk<sup>b</sup>, Asta Dabuliene<sup>b</sup>,  
Juozas Vidas Grazulevicius<sup>b</sup>, Rajneesh Misra<sup>a\*</sup>

<sup>a</sup> Department of Chemistry, Indian Institute of Technology Indore,

Indore- 453552, India

<sup>b</sup> Department of Polymer Chemistry and Technology, Kaunas University of  
Technology, K. Barsausko g. 59, Kaunas 51423, Lithuania;

Email: rajneeshmisra@iiti.ac.in

|              |                                                                                                |                 |
|--------------|------------------------------------------------------------------------------------------------|-----------------|
| <b>I.</b>    | <b>Experimental Section.....</b>                                                               | <b>S2</b>       |
| <b>II.</b>   | <b>Solvatochromism .....</b>                                                                   | <b>S3-S5</b>    |
| <b>III.</b>  | <b>Lippert Mataga Plot.....</b>                                                                | <b>S4</b>       |
| <b>IV.</b>   | <b>Aggregation Induced Emission (AIE) .....</b>                                                | <b>S6-S7</b>    |
| <b>V.</b>    | <b>Photophysical Properties .....</b>                                                          | <b>S8-S12</b>   |
| <b>VI.</b>   | <b>Table S2. Intensity averaged lifetime.....</b>                                              | <b>S13-S14</b>  |
| <b>VII.</b>  | <b>DFT Optimized Structures.....</b>                                                           | <b>S15</b>      |
| <b>VIII.</b> | <b>TD-DFT graphs and Table .....</b>                                                           | <b>S16-S17</b>  |
| <b>IX.</b>   | <b>Thermal properties.....</b>                                                                 | <b>S18</b>      |
| <b>X.</b>    | <b>Electroluminescent Properties .....</b>                                                     | <b>S19-S28</b>  |
| <b>XI.</b>   | <b>Copies of <sup>1</sup>H NMR, <sup>13</sup>C NMR and HRMS spectra of new compounds. ....</b> | <b>S29-S37</b>  |
| <b>XII.</b>  | <b>DFT and TD-DFT data .....</b>                                                               | <b>S38-S107</b> |

## Experimental Section

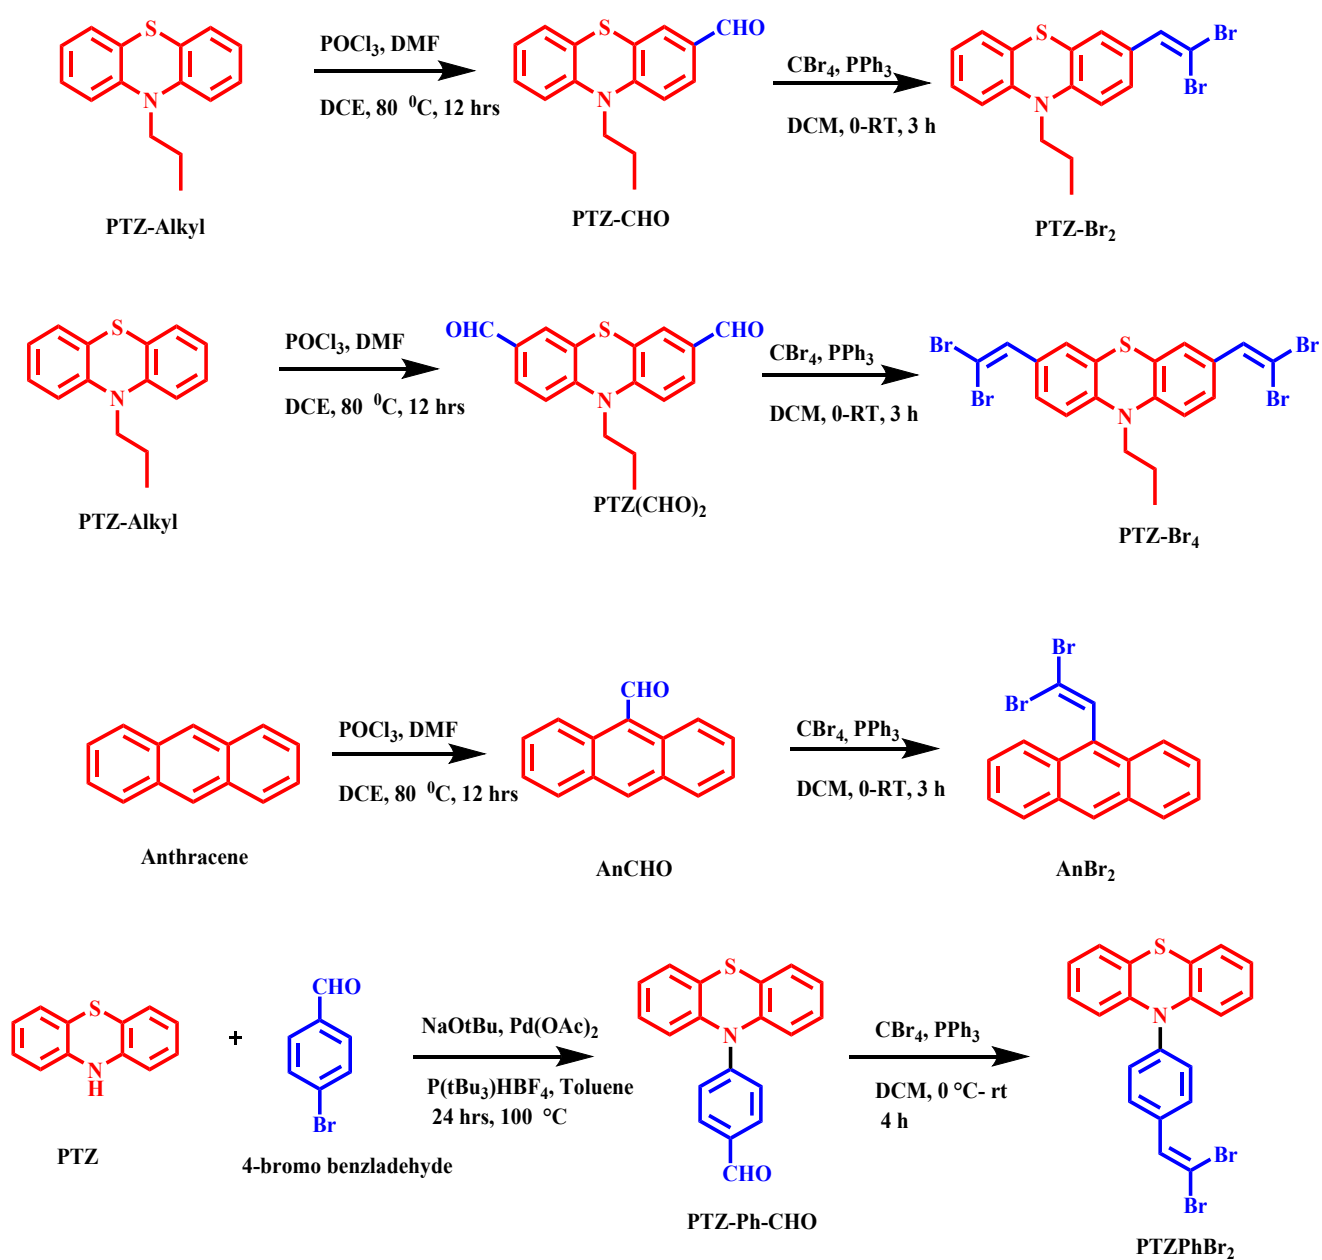

**Scheme S1.** Synthetic scheme for Intermediate Intermediates.

## Solvatochromism

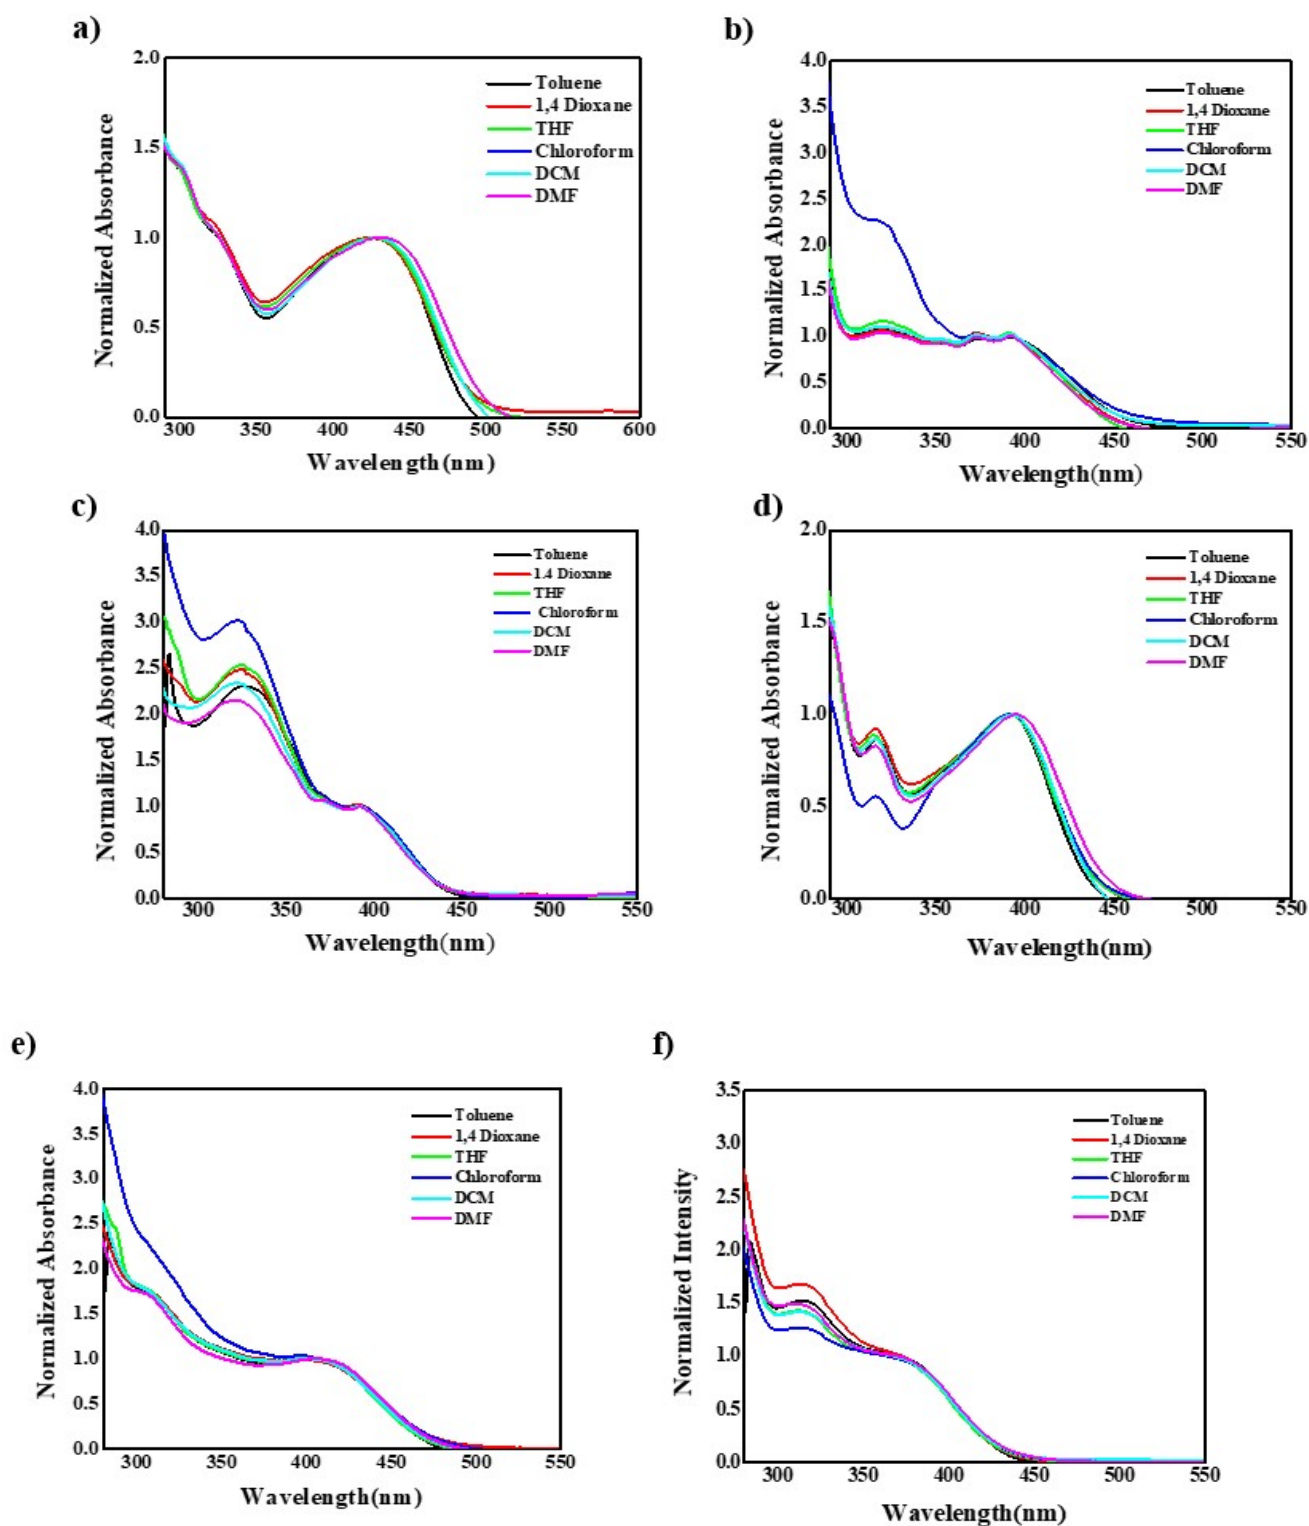

**Fig. S1.** UV- vis absorption Spectra of (a) (PTZ)<sub>3</sub>, b) An(PTZ)<sub>2</sub>, c) An(TPE)<sub>2</sub>, d) (PTZ)<sub>4</sub>, e) (PTZ)<sub>5</sub> and f) PTZ-Ph-(PTZ)<sub>2</sub> in different polarity of solvents respectively.

## Lippert Mataga Plot

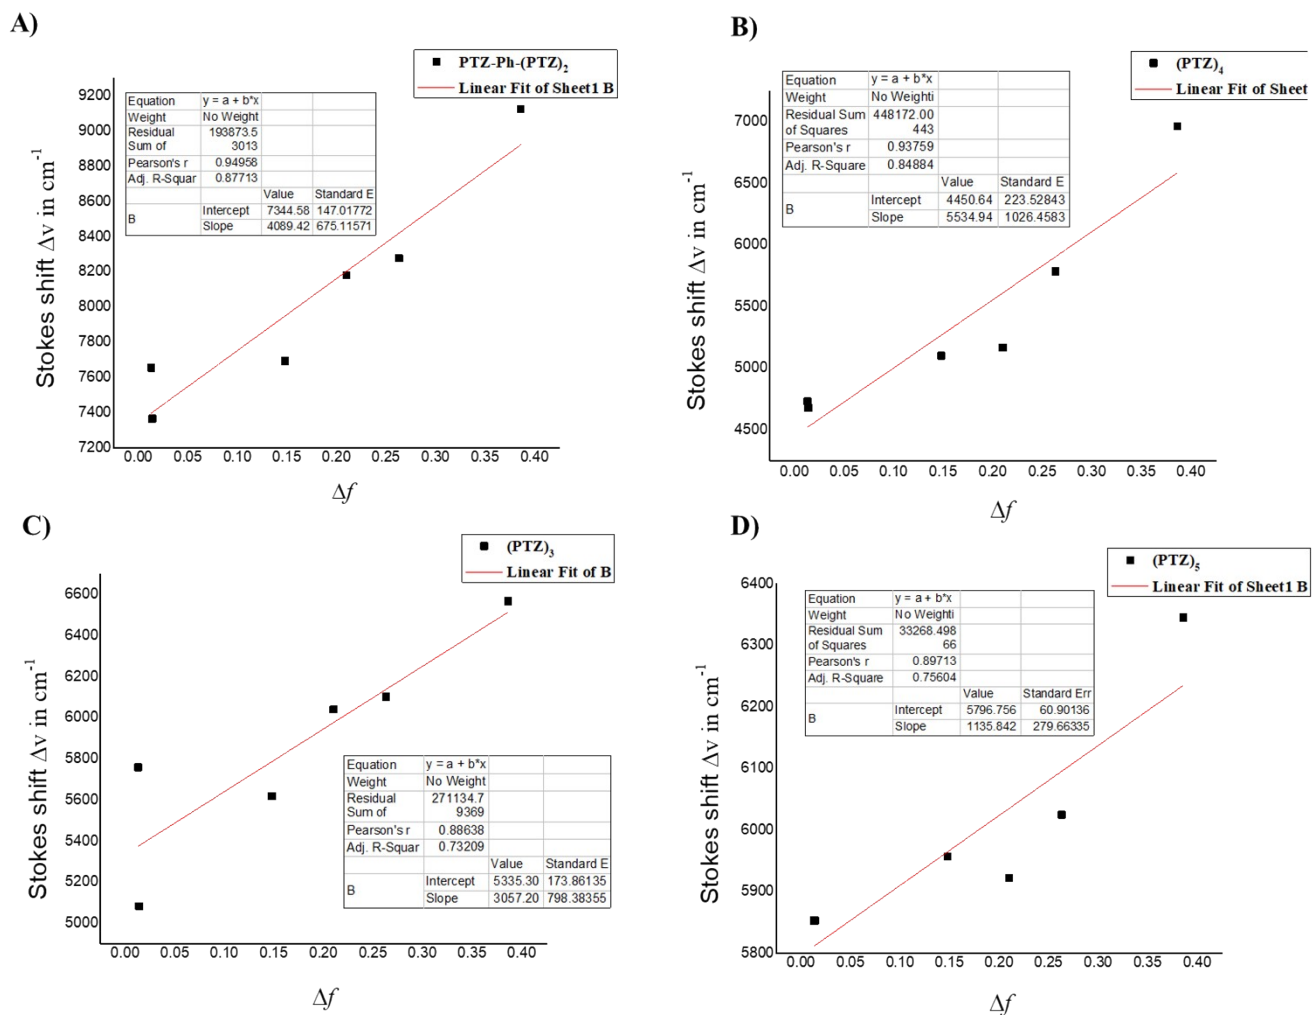

**Fig. S2.** Stokes Shift ( $\Delta\nu$ ) of (a) PTZ-Ph-(PTZ)<sub>2</sub>, (b) (PTZ)<sub>4</sub>, (c) (PTZ)<sub>3</sub>, and d) (PTZ)<sub>5</sub> as a function of the solvent polarity parameter ( $\Delta f$ ).

**Table S1** Photophysical properties of the compounds PTZ-Ph-(PTZ)<sub>2</sub>, (PTZ)<sub>4</sub>, (PTZ)<sub>3</sub>, and (PTZ)<sub>5</sub>

| Compound                        | Solvent         | $\lambda_{abs}$ (nm) <sup>a</sup> | $\lambda_{em}$ (nm) <sup>a</sup> | Stokes shift (cm <sup>-1</sup> ) | $\phi^b$ |
|---------------------------------|-----------------|-----------------------------------|----------------------------------|----------------------------------|----------|
| <b>(PTZ)<sub>3</sub></b>        | Toluene         | 428                               | 547                              | 5083                             | 0.43     |
|                                 | 1,4 Dioxane     | 424                               | 561                              | 5759                             | 0.33     |
|                                 | Tetrahydrofuran | 424                               | 570                              | 6041                             | 0.32     |
|                                 | Chloroform      | 430                               | 567                              | 5619                             | 0.35     |
|                                 | Dichloromethane | 430                               | 583                              | 6103                             | 0.45     |
|                                 | DMF             | 435                               | 609                              | 6568                             | 0.27     |
| <b>(PTZ)<sub>4</sub></b>        | Toluene         | 390                               | 477                              | 4677                             | 0.42     |
|                                 | 1,4 Dioxane     | 390                               | 483                              | 4731                             | 0.32     |
|                                 | Tetrahydrofuran | 391                               | 490                              | 5167                             | 0.31     |
|                                 | Chloroform      | 392                               | 490                              | 5102                             | 0.33     |
|                                 | Dichloromethane | 392                               | 507                              | 5787                             | 0.46     |
|                                 | DMF             | 394                               | 530                              | 6963                             | 0.41     |
| <b>(PTZ)<sub>5</sub></b>        | Toluene         | 408                               | 536                              | 5853                             | 0.29     |
|                                 | 1,4 Dioxane     | 408                               | 536                              | 5853                             | 0.19     |
|                                 | Tetrahydrofuran | 408                               | 538                              | 5922                             | 0.24     |
|                                 | Chloroform      | 408                               | 539                              | 5957                             | 0.25     |
|                                 | Dichloromethane | 408                               | 541                              | 6025                             | 0.23     |
|                                 | DMF             | 411                               | 556                              | 6345                             | 0.21     |
| <b>PTZ-Ph-(PTZ)<sub>2</sub></b> | Toluene         | 376                               | 520                              | 7365                             | 0.39     |
|                                 | 1,4 Dioxane     | 375                               | 526                              | 7655                             | 0.24     |
|                                 | Tetrahydrofuran | 375                               | 541                              | 8182                             | 0.31     |
|                                 | Chloroform      | 378                               | 533                              | 7694                             | 0.25     |
|                                 | Dichloromethane | 377                               | 548                              | 8277                             | 0.23     |
|                                 | DMF             | 375                               | 570                              | 9123                             | 0.27     |

(<sup>a</sup>absorption and emission maxima values recorded in different polarity solvents, <sup>b</sup>the fluorescence quantum yields were measured using quinine sulphate as a standard in 0.5 M H<sub>2</sub>SO<sub>4</sub>).

### Aggregation Induced Emission (AIE)

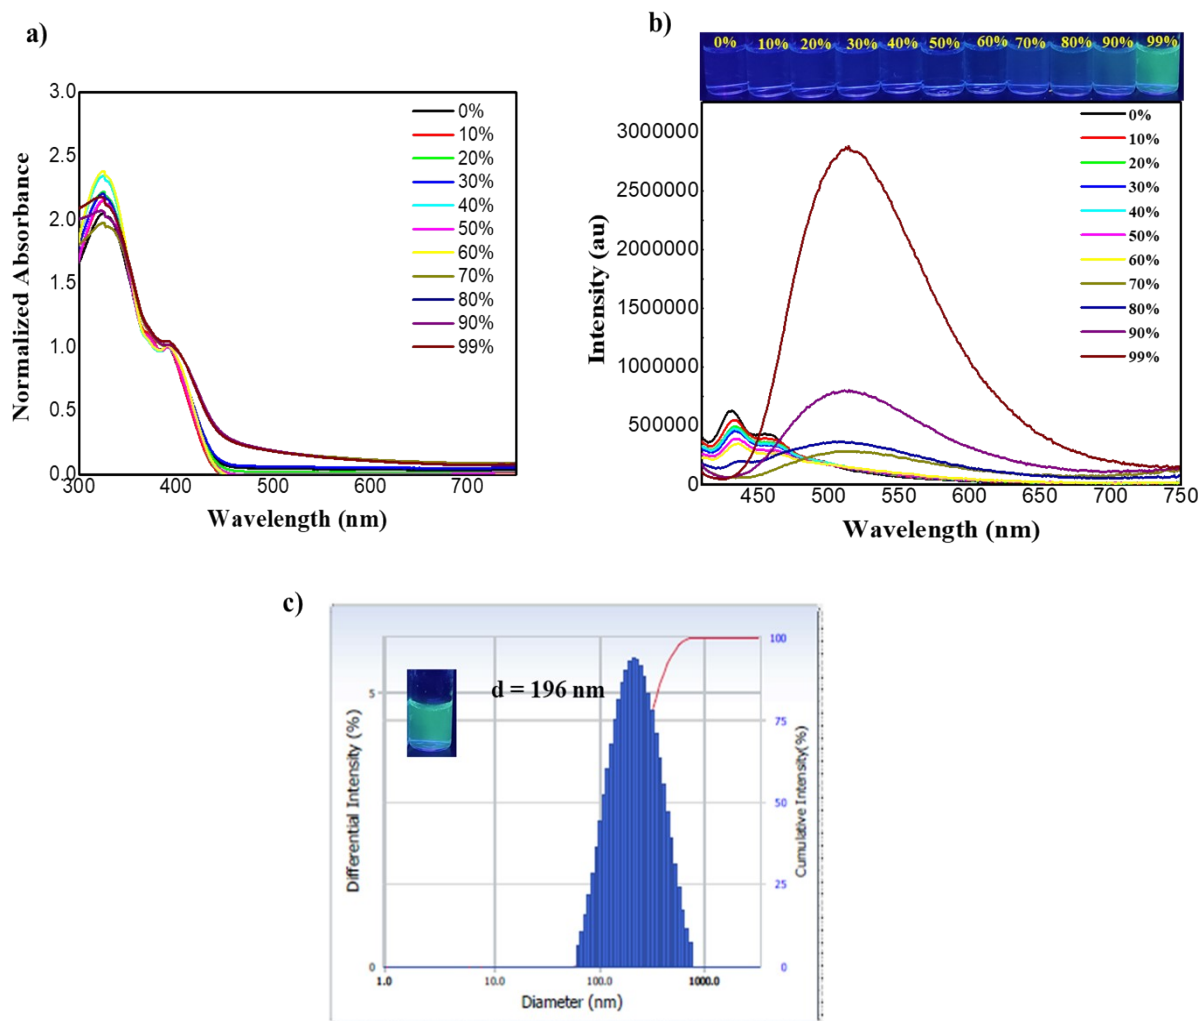

**Fig. S3.** Absorption spectra (a) and Emission spectra (b) of An(TPE)<sub>2</sub> in different THF- Water Mixture with increasing water percentage (Inset: Photographs under 365 nm UV illuminations) c) Dynamic light scattering(DLS) analysis.

**Table S2** Fluorescence quantum yields of **An(TPE)<sub>2</sub>** in different THF-water mixtures with increasing water percentage.

| Water Vol % | $\Phi_f^a$           |
|-------------|----------------------|
|             | An(TPE) <sub>2</sub> |
| 0%          | 0.02                 |
| 10%         | 0.03                 |
| 20%         | 0.01                 |
| 30%         | 0.01                 |
| 40%         | 0.01                 |
| 50%         | 0.02                 |
| 60%         | 0.01                 |
| 70%         | 0.01                 |
| 80%         | 0.01                 |
| 90%         | 0.07                 |
| 99%         | 0.21                 |

(<sup>a</sup> Fluorescence quantum yields recorded using quinine sulphate as a standard in 0.5 M H<sub>2</sub>SO<sub>4</sub> solution.)

# Photophysical properties

a)

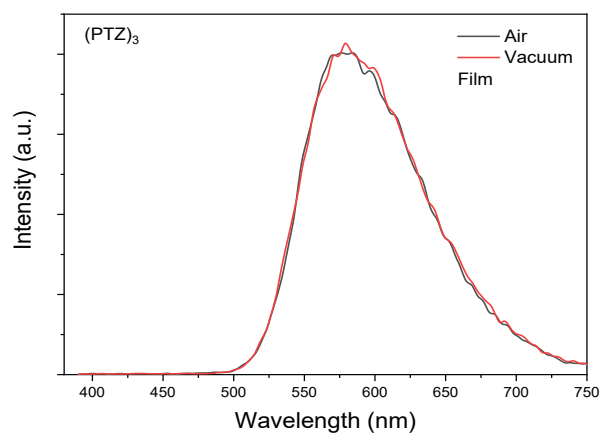

b)

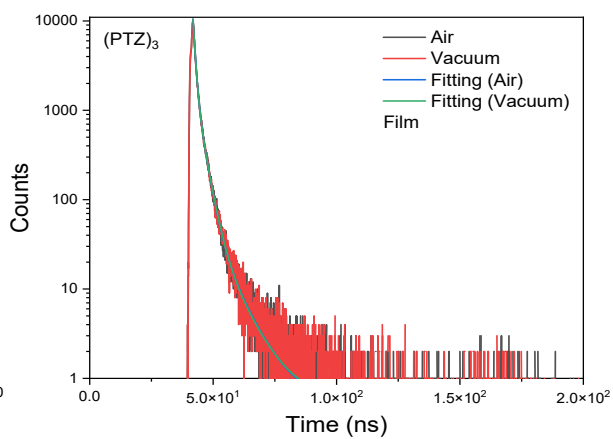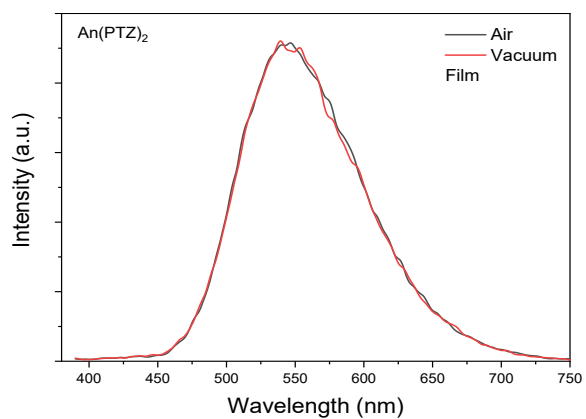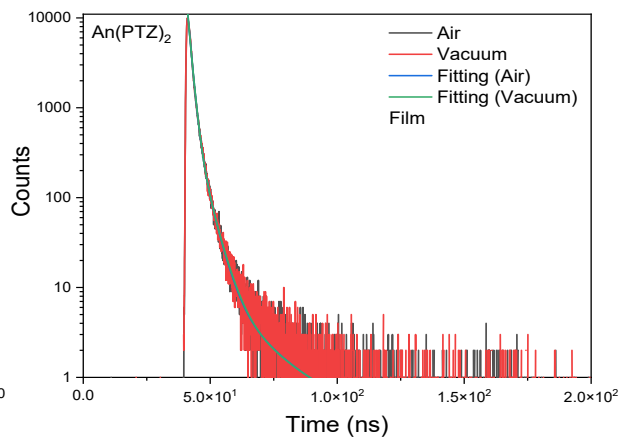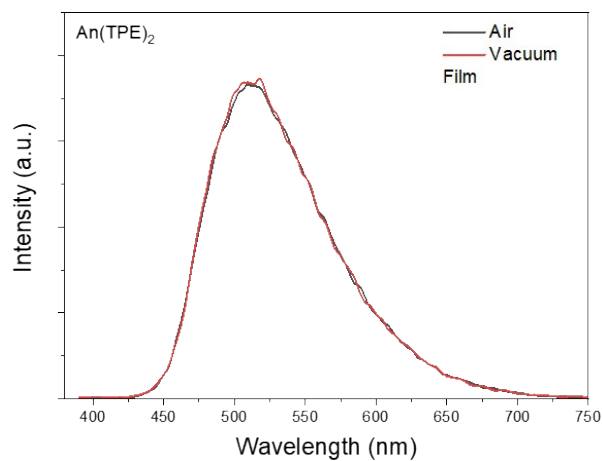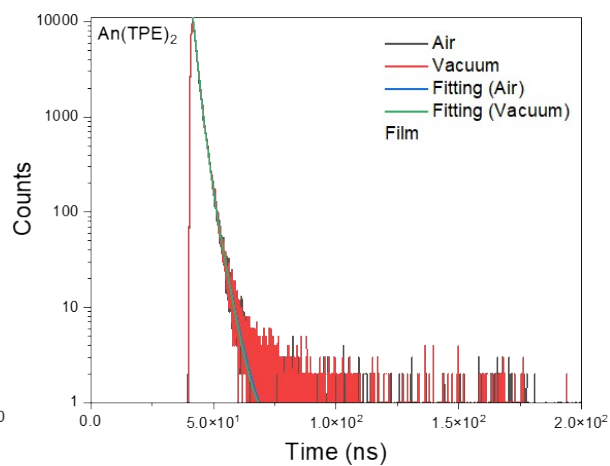

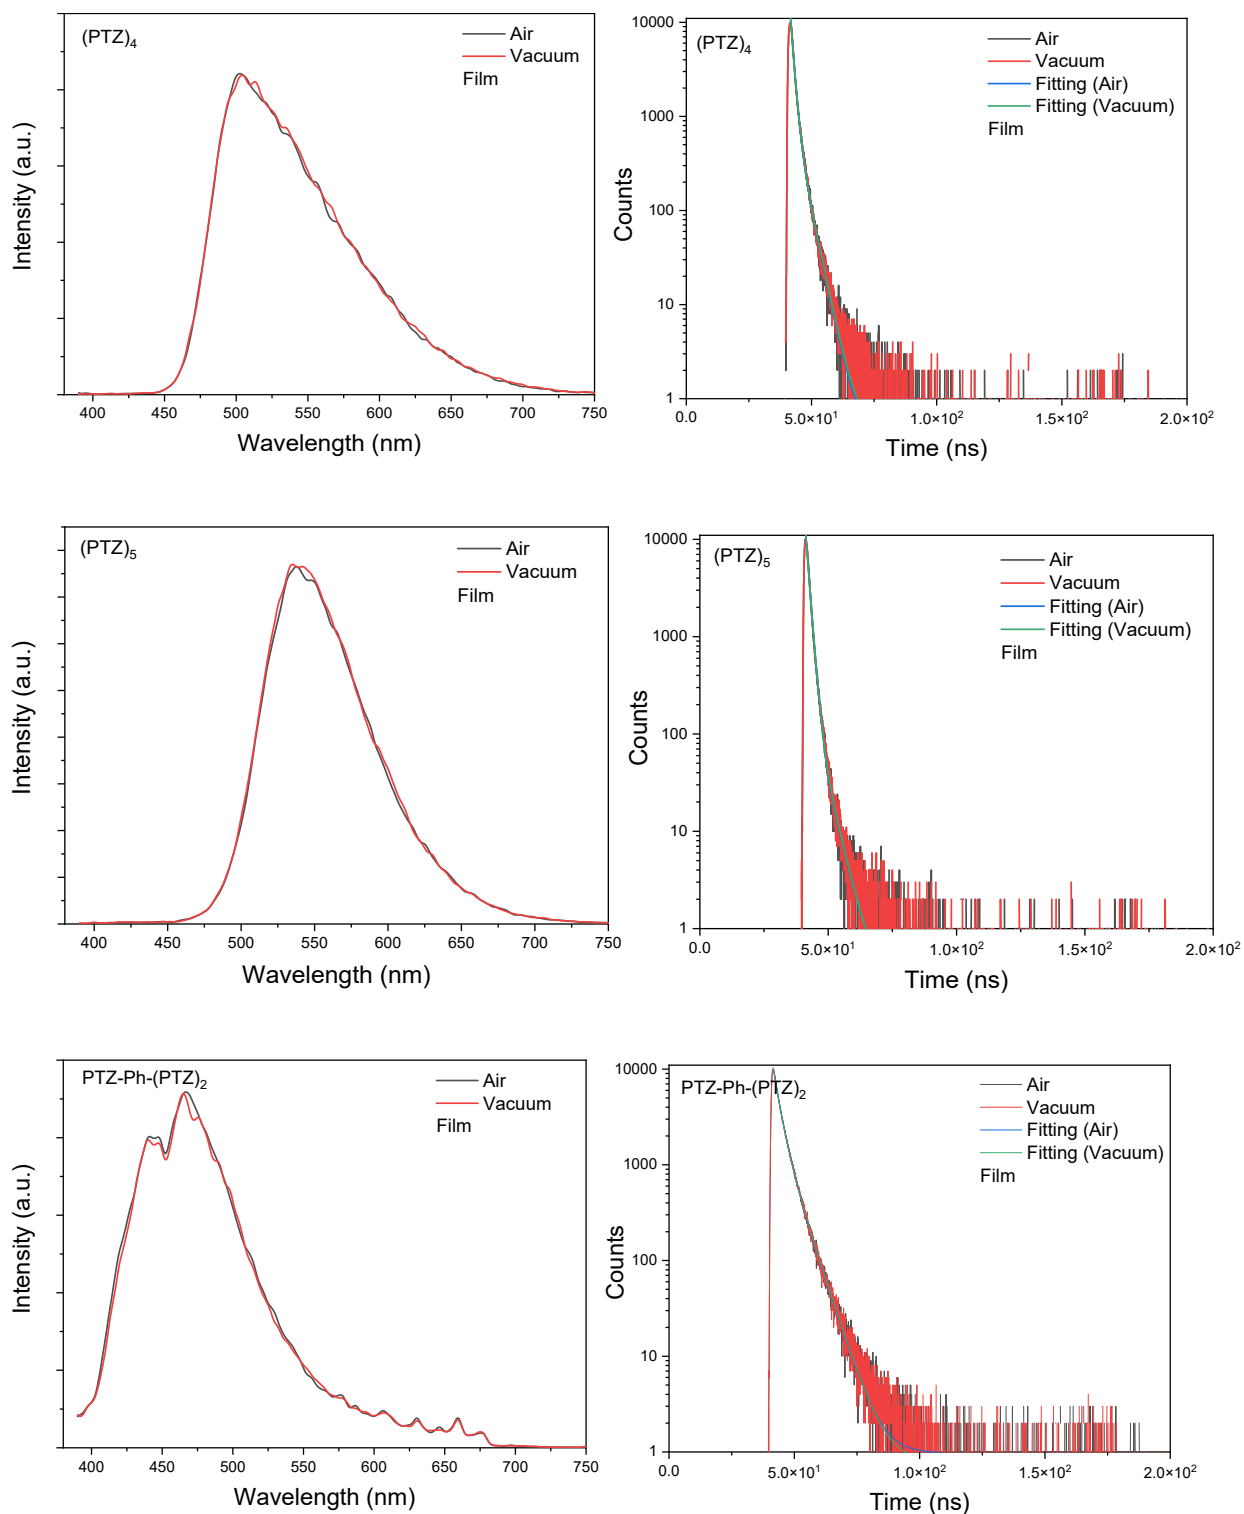

**Fig. S4.** Emission spectra (a) and PL decay curves (b) of neat films of  $(\text{PTZ})_3$ ,  $\text{An}(\text{PTZ})_2$ ,  $\text{An}(\text{TPE})_2$ ,  $(\text{PTZ})_4$ ,  $(\text{PTZ})_5$ , and  $\text{PTZ-Ph-(PTZ)}_2$  recorded in air and vacuum at 25 °C ( $\lambda_{\text{ex}} = 340 \text{ nm}$ ).

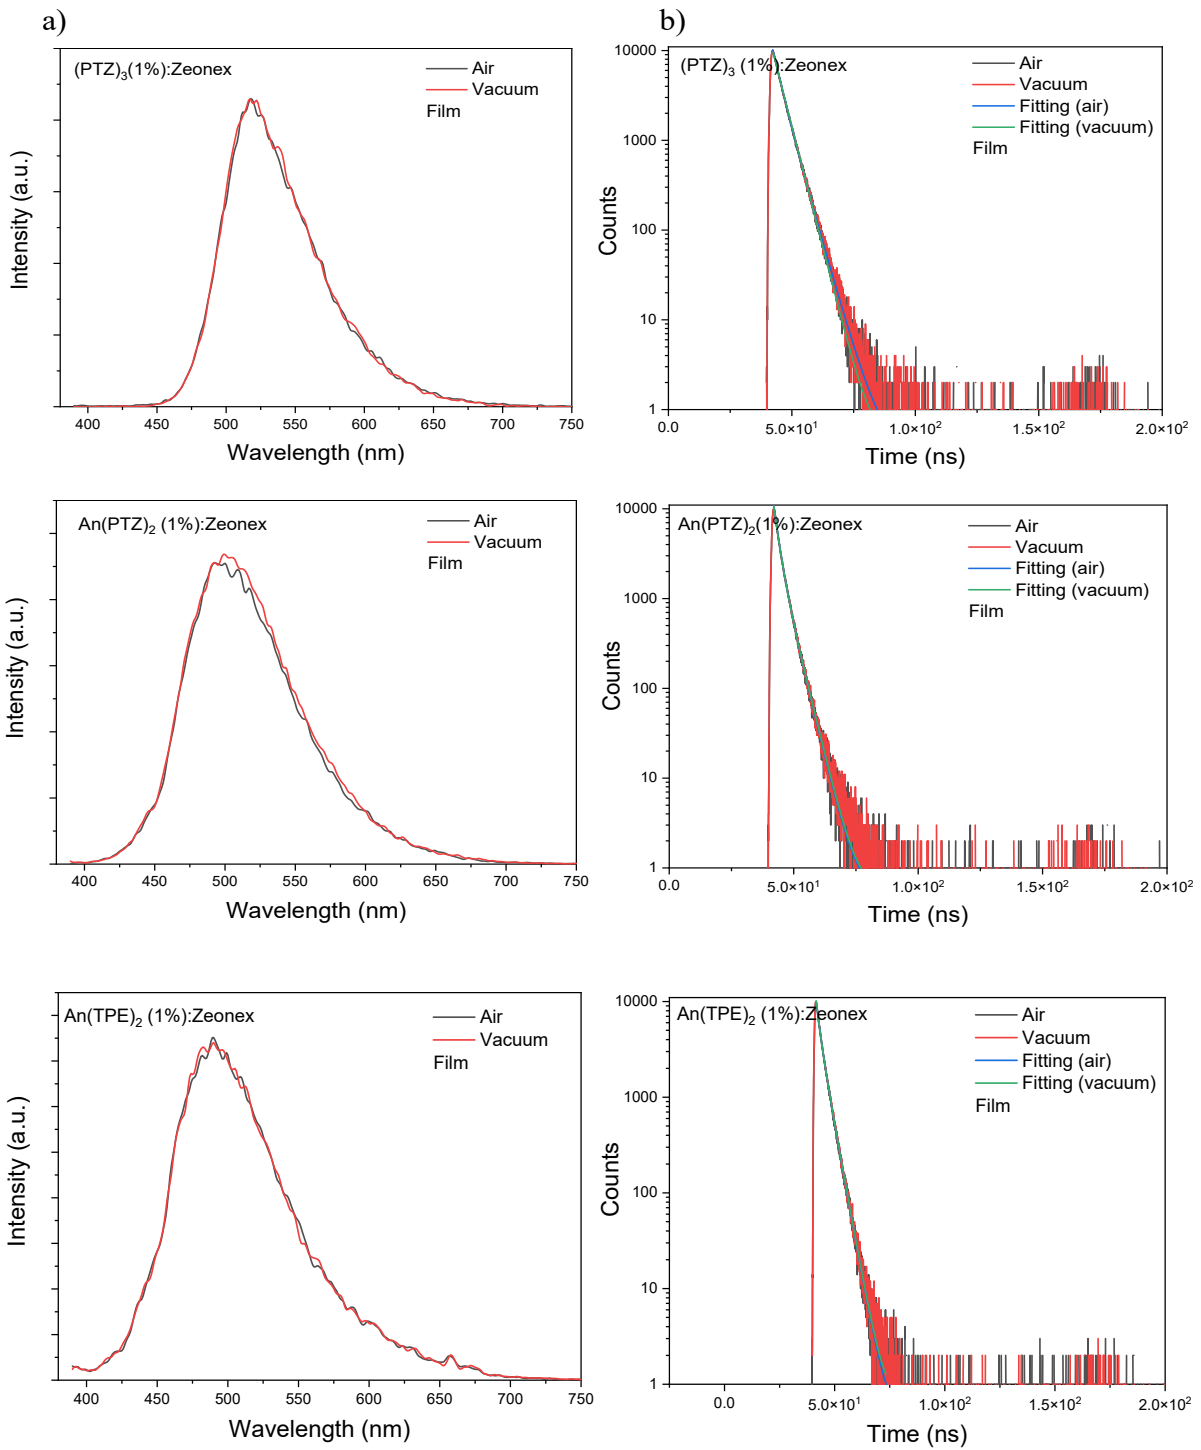

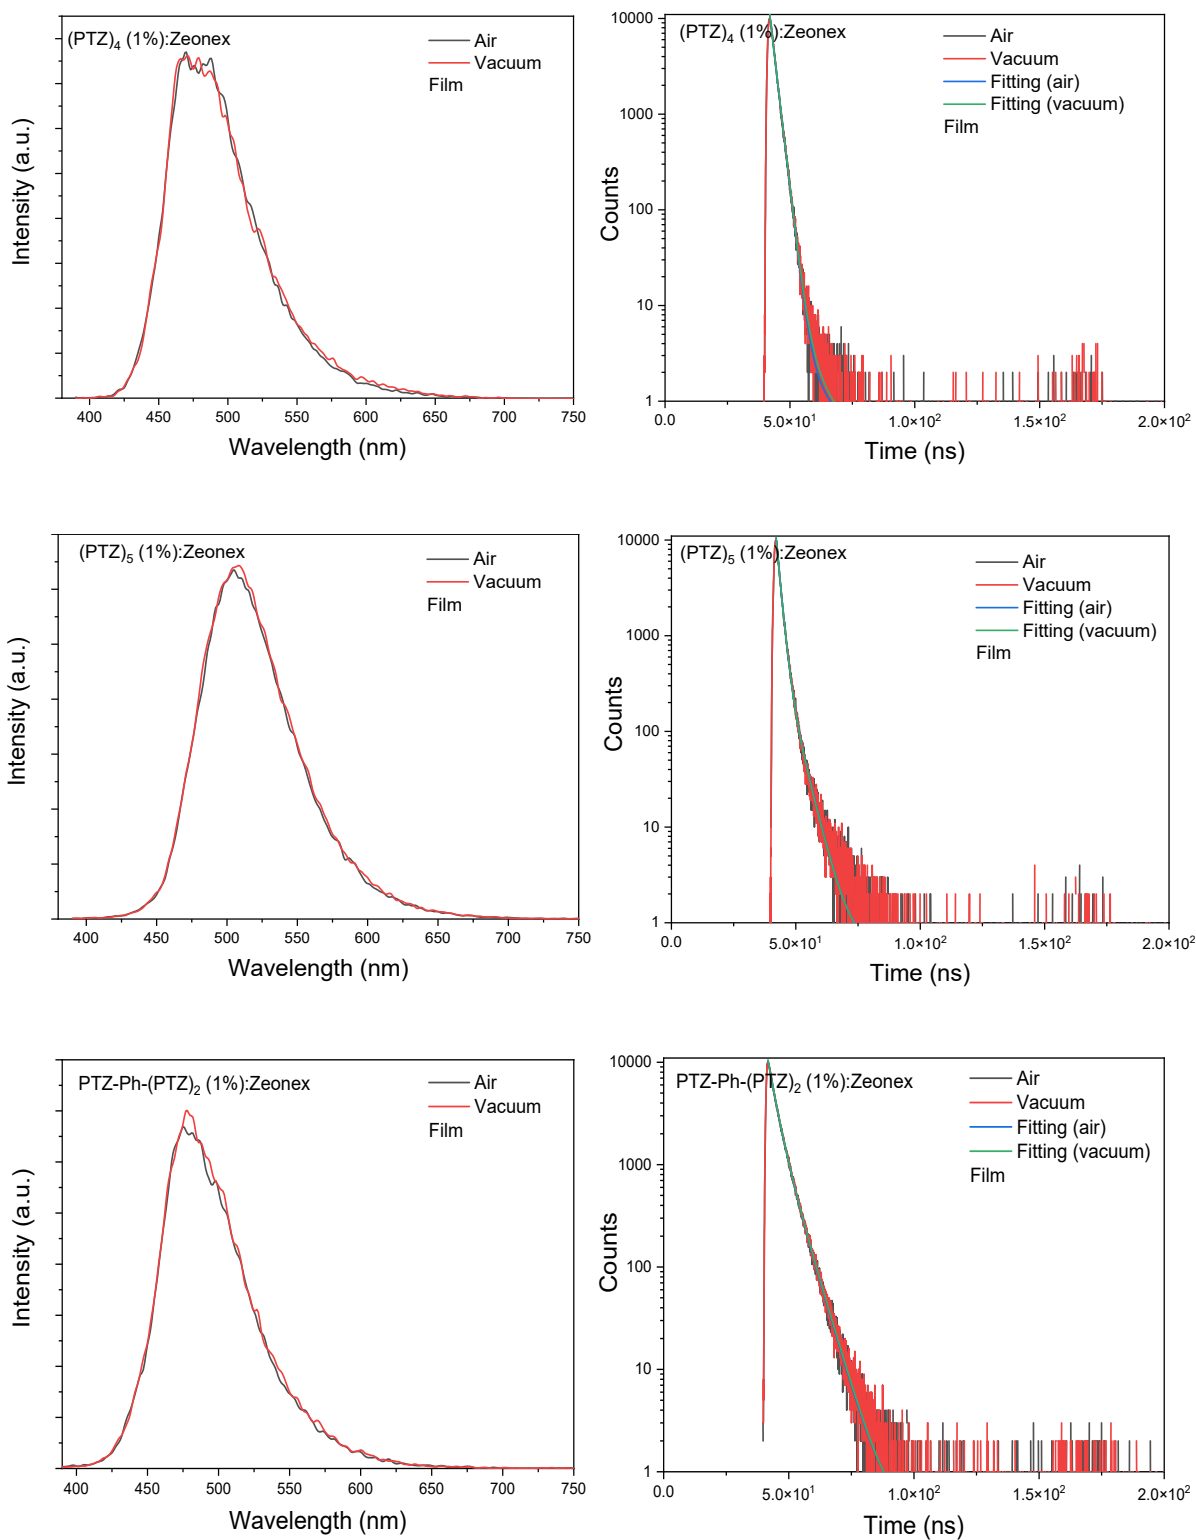

**Fig. S5.** Emission spectra (a) and PL decay curves (b) of (PTZ)<sub>3</sub>, An(PTZ)<sub>2</sub>, An(TPE)<sub>2</sub>, (PTZ)<sub>4</sub>, (PTZ)<sub>5</sub>, and PTZ-Ph-(PTZ)<sub>2</sub> with 1wt% dispersed in Zeonex recorded in air and vacuum at 25 °C ( $\lambda_{\text{ex}} = 340$  nm).

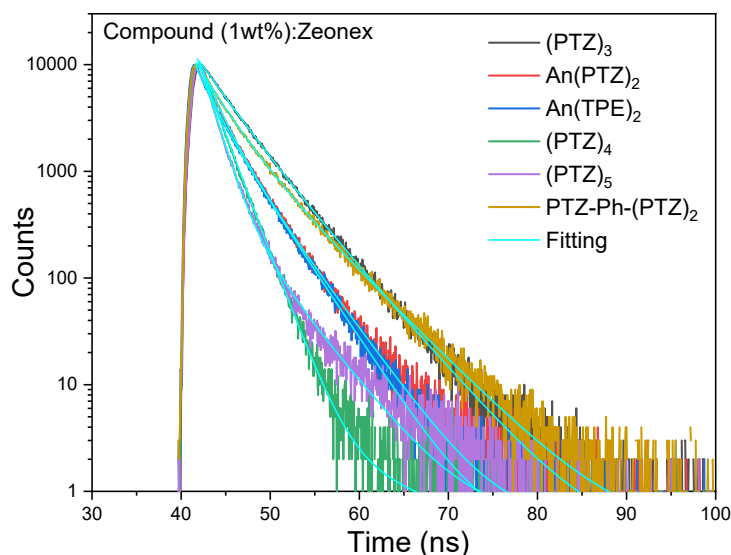

**Fig. S6.** PL decay curves of  $(\text{PTZ})_3$ ,  $\text{An}(\text{PTZ})_2$ ,  $\text{An}(\text{TPE})_2$ ,  $(\text{PTZ})_4$ ,  $(\text{PTZ})_5$ , and  $\text{PTZ-Ph}-(\text{PTZ})_2$  with 1wt% dispersed in Zeonex recorded in air.

### Determination and analysis of fluorescence lifetimes

The fittings of their PL decay curves were provided using software of the Edinburgh Instruments FLS980 spectrometer, according to the following formulas

$$R(t) = B1 \cdot \exp(-t/\tau1) \quad (1)$$

$$R(t) = B1 \cdot \exp(-t/\tau1) + B2 \cdot \exp(-t/\tau2) \quad (2)$$

$$R(t) = B1 \cdot \exp(-t/\tau1) + B2 \cdot \exp(-t/\tau2) + B3 \cdot \exp(-t/\tau3) \quad (3)$$

Here,  $t$  is time,  $B1$ ,  $B2$ , and  $B3$  are the fractional intensities of the time components  $\tau1$ ,  $\tau2$ , and  $\tau3$ , respectively. If the error fitting factor  $\chi^2$  was not in the range  $1 \geq \chi^2 < 1.3$  using formula (1), formula (2) or even formula (3) was selected. The fitting data are collected in Table S3. In addition, the formula (4)<sup>1</sup>.

$$\tau = \frac{\sum A_i \tau_i^2}{\sum A_i \tau_i} \quad \#(4)$$

was used to calculate the average prompt and delayed fluorescence lifetimes. The results are also collected in Table S3.

**Table S3.** Fitting parameters of PL decay curves and the corresponding intensity-averaged emission lifetimes.

| Parameters                           | Neat Film          |                      |                      |                    |                    |                           |
|--------------------------------------|--------------------|----------------------|----------------------|--------------------|--------------------|---------------------------|
|                                      | (PTZ) <sub>3</sub> | An(PTZ) <sub>2</sub> | An(TPE) <sub>2</sub> | (PTZ) <sub>4</sub> | (PTZ) <sub>5</sub> | PTZ-Ph-(PTZ) <sub>2</sub> |
| <b>Air</b>                           |                    |                      |                      |                    |                    |                           |
| <b>B1</b>                            | 8746.48            | 10216.80             | 10589.84             | 10334.37           | 11822.28           | 7123.62                   |
| <b><math>\tau_1</math> (ns)</b>      | 0.77               | 1.26                 | 1.66                 | 1.14               | 1.23               | 2.26                      |
| <b>Rel (%)</b>                       | (51.45%)           | (77.70%)             | (81.33%)             | (74.18%)           | (93.25%)           | (50.38%)                  |
| <b>B2</b>                            | 2283.70            | 939.59               | 1134.55              | 1205.37            | 265.28             | 2931.27                   |
| <b><math>\tau_2</math> (ns)</b>      | 2.47               | 3.71                 | 3.55                 | 3.39               | 2.2                | 5.40                      |
| <b>Rel (%)</b>                       | (42.98%)           | (20.96%)             | (18.67%)             | (25.82%)           | (6.75%)            | (49.62%)                  |
| <b>B3</b>                            | 94.61              | 14.06                | -                    | -                  | -                  | -                         |
| <b><math>\tau_3</math> (ns)</b>      | 7.74               | 15.83                | -                    | -                  | -                  | -                         |
| <b>Rel (%)</b>                       | (5.57%)            | (1.34%)              | -                    | -                  | -                  | -                         |
| $\sum B_i \tau_i^2$                  | 24786.27           | 32676.08             | 43479.53             | 27282.78           | 22045.94           | 121860.43                 |
| $\sum B \tau_i$                      | 13107.8100         | 16581.6167           | 21606.7869           | 15867.3861         | 15591.9132         | 31928.2392                |
| <b><math>\tau_{avg}</math> (ns)</b>  | 1.89               | 1.97                 | 2.01                 | 1.71               | 1.41               | 3.81                      |
| <b><math>\chi^2</math></b>           | 1.04               | 1.07                 | 1.07                 | 1.07               | 1.06               | 1.06                      |
| <b>Vacuum</b>                        |                    |                      |                      |                    |                    |                           |
| <b>B1</b>                            | 8869.19            | 10594.73             | 9855.84              | 10439.70           | 11859.65           | 7639.19                   |
| <b><math>\tau_1</math> (ns)</b>      | 0.79               | 1.29                 | 1.57                 | 1.14               | 1.23               | 2.32                      |
| <b>Rel (%)</b>                       | (53.56%)           | (79.67%)             | (74.27%)             | (74.96%)           | (92.76%)           | (52.23%)                  |
| <b>B2</b>                            | 2086.58            | 847.94               | 1646.45              | 1147.89            | 289.51             | 2954.67                   |
| <b><math>\tau_2</math> (ns)</b>      | 2.59               | 3.88                 | 3.25                 | 3.47               | 3.92               | 5.48                      |
| <b>Rel (%)</b>                       | (41.34%)           | (19.12%)             | (25.73%)             | (25.04%)           | (7.24%)            | (47.77%)                  |
| <b>B3</b>                            | 84.43              | 12.75                | -                    | -                  | -                  | -                         |
| <b><math>\tau_3</math> (ns)</b>      | 7.89               | 16.33                | -                    | -                  | -                  | -                         |
| <b>Rel (%)</b>                       | (5.10%)            | (1.21%)              | -                    | -                  | -                  | -                         |
| $\sum B_i \tau_i^2$                  | 24788.19           | 33795.95             | 41684.29             | 27389.06           | 22391.19           | 129847.10                 |
| $\sum B \tau_i$                      | 13077.0550         | 17165.4164           | 20824.6313           | 15884.4363         | 15722.2487         | 33914.5124                |
| <b><math>\tau_{avg}</math> (ns)</b>  | 1.89               | 1.96                 | 2.00                 | 1.72               | 1.42               | 3.82                      |
| <b><math>\chi^2</math></b>           | 1.03               | 1.08                 | 1.07                 | 1.07               | 1.02               | 1.04                      |
| <b>Compound (1%):Zeonex (air)</b>    |                    |                      |                      |                    |                    |                           |
| <b>B1</b>                            | 5314.36            | 7164.07              | 4410.02              | 7366.16            | 10205.24           | 6925.96                   |
| <b><math>\tau_1</math> (ns)</b>      | 3.01               | 1.75                 | 1.62                 | 2.12               | 1.45               | 2.64                      |
| <b>Rel (%)</b>                       | (40.33%)           | (45.97%)             | (26.40%)             | (57.60%)           | (82.16%)           | (48.77%)                  |
| <b>B2</b>                            | 5029.86            | 3873.91              | 5777.38              | 3054.95            | 771.08             | 3633.68                   |
| <b><math>\tau_2</math> (ns)</b>      | 4.71               | 3.80                 | 3.45                 | 3.76               | 4.18               | 5.28                      |
| <b>Rel (%)</b>                       | (59.67%)           | (54.03%)             | (73.60%)             | (42.40%)           | (17.84%)           | (51.23%)                  |
| $\sum B_i \tau_i^2$                  | 159731.55          | 77879.22             | 80338.92             | 76296.13           | 34929.14           | 48271.17                  |
| $\sum B \tau_i$                      | 39686.8642         | 27257.9805           | 27076.1934           | 27102.8712         | 18020.7124         | 18284.5344                |
| <b><math>\tau_{avg}</math> (ns)</b>  | 4.02               | 2.85                 | 2.96                 | 2.81               | 1.93               | 2.64                      |
| <b><math>\chi^2</math></b>           | 1.01               | 1.09                 | 1.05                 | 1.04               | 1.07               | 1.02                      |
| <b>Compound (1%):Zeonex (vacuum)</b> |                    |                      |                      |                    |                    |                           |
| <b>B1</b>                            | 9653.27            | 7171.38              | 4293.60              | 7322.91            | 10257.07           | 7057.07                   |

|                          |        |            |            |            |            |            |
|--------------------------|--------|------------|------------|------------|------------|------------|
| $\tau_1$ (ns)            | 4.03   | 1.75       | 1.56       | 2.11       | 1.48       | 2.63       |
| Rel (%)                  | (100%) | (46.12%)   | (24.37%)   | (55.98%)   | (82.80%)   | (49.02%)   |
| <b>B2</b>                | -      | 3804.03    | 6066.78    | 3244.34    | 749.04     | 3633.81    |
| $\tau_2$ (ns)            | -      | 3.85       | 3.42       | 3.74       | 4.20       | 5.32       |
| Rel (%)                  | -      | (53.88%)   | (75.63%)   | (44.02%)   | (17.20%)   | (50.98%)   |
| $\sum B_i \tau_i^2$      | -      | 78347.59   | 81408.39   | 77982.86   | 35680.15   | 151658.59  |
| $\sum B \tau_i$          | -      | 27195.4305 | 27446.4036 | 27585.1717 | 18326.4316 | 37891.9633 |
| $\tau_{\text{avg}}$ (ns) | -      | 2.88       | 2.96       | 2.82       | 1.94       | 4.00       |
| $\chi^2$                 | 1.00   | 1.03       | 1.00       | 1.02       | 1.04       | 1.00       |

**Table S4.** Photophysical parameters of the compounds under air and vacuum

| Compounds                     | $\lambda_{\text{ems}}$ (nm)<br>(Air/Vac) | $\tau_{\text{avg}}$ (ns)<br>(Air/Vac) | $\lambda_{\text{ems}}$ (nm)  | $\tau_{\text{avg}}$ (ns) (Air/Vac) |
|-------------------------------|------------------------------------------|---------------------------------------|------------------------------|------------------------------------|
|                               |                                          |                                       | (Air/Vac)<br>Zeonex<br>+(1%) | (Air/Vac)<br>Zeonex +(1%)          |
| (PTZ) <sub>3</sub>            | 584/579                                  | 1.89/1.89                             | 518/517                      | 4.02/4.03                          |
| An(PTZ) <sub>2</sub>          | 547/546                                  | 1.97/1.96                             | 499/499                      | 2.85/2.88                          |
| An(TPE) <sub>2</sub>          | 510/510                                  | 2.01/2.00                             | 490/490                      | 2.96/2.96                          |
| (PTZ) <sub>4</sub>            | 502/504                                  | 1.71/1.72                             | 470/471                      | 2.81/2.82                          |
| (PTZ) <sub>5</sub>            | 538/535                                  | 1.41/1.42                             | 505/508                      | 1.93/1.94                          |
| PTZ-Ph-<br>(PTZ) <sub>2</sub> | 508 / 508                                | 3.81/3.82                             | 475/478                      | 2.64/4.00                          |

DFT Optimized Structures of (PTZ)<sub>3</sub>, An(PTZ)<sub>2</sub>, An(TPE)<sub>2</sub>, (PTZ)<sub>4</sub>, (PTZ)<sub>5</sub> and PTZ-Ph-(PTZ)<sub>2</sub>.

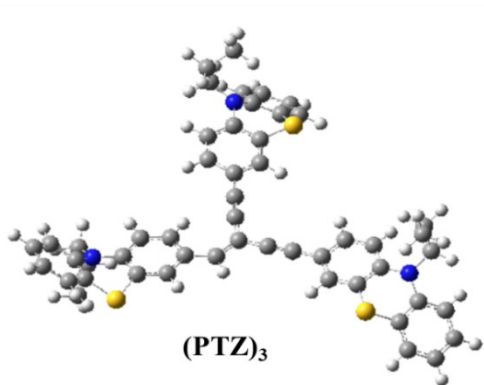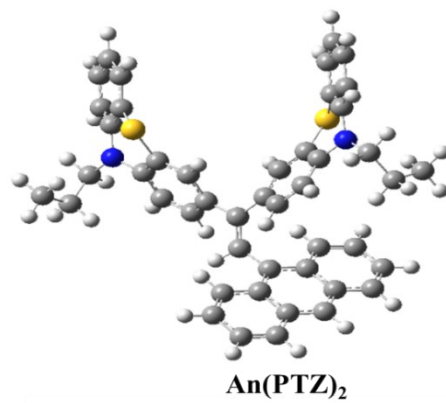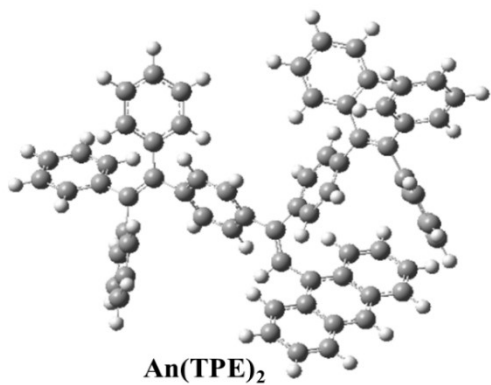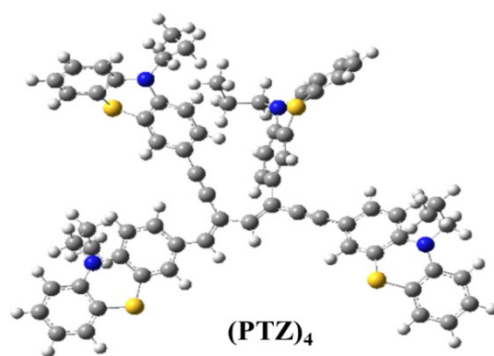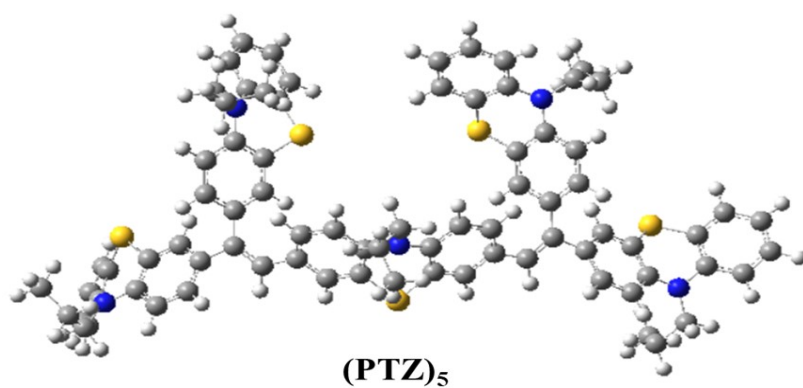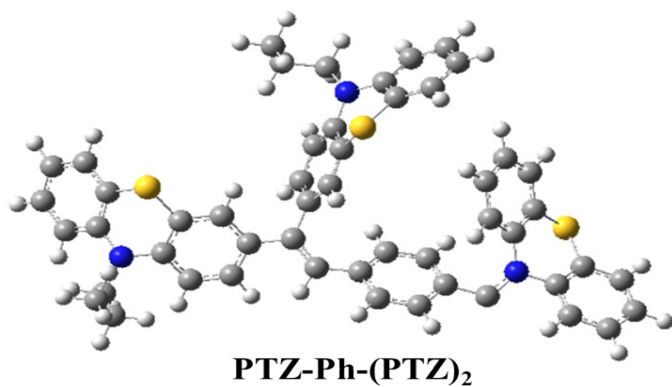

## TD-DFT Calculation

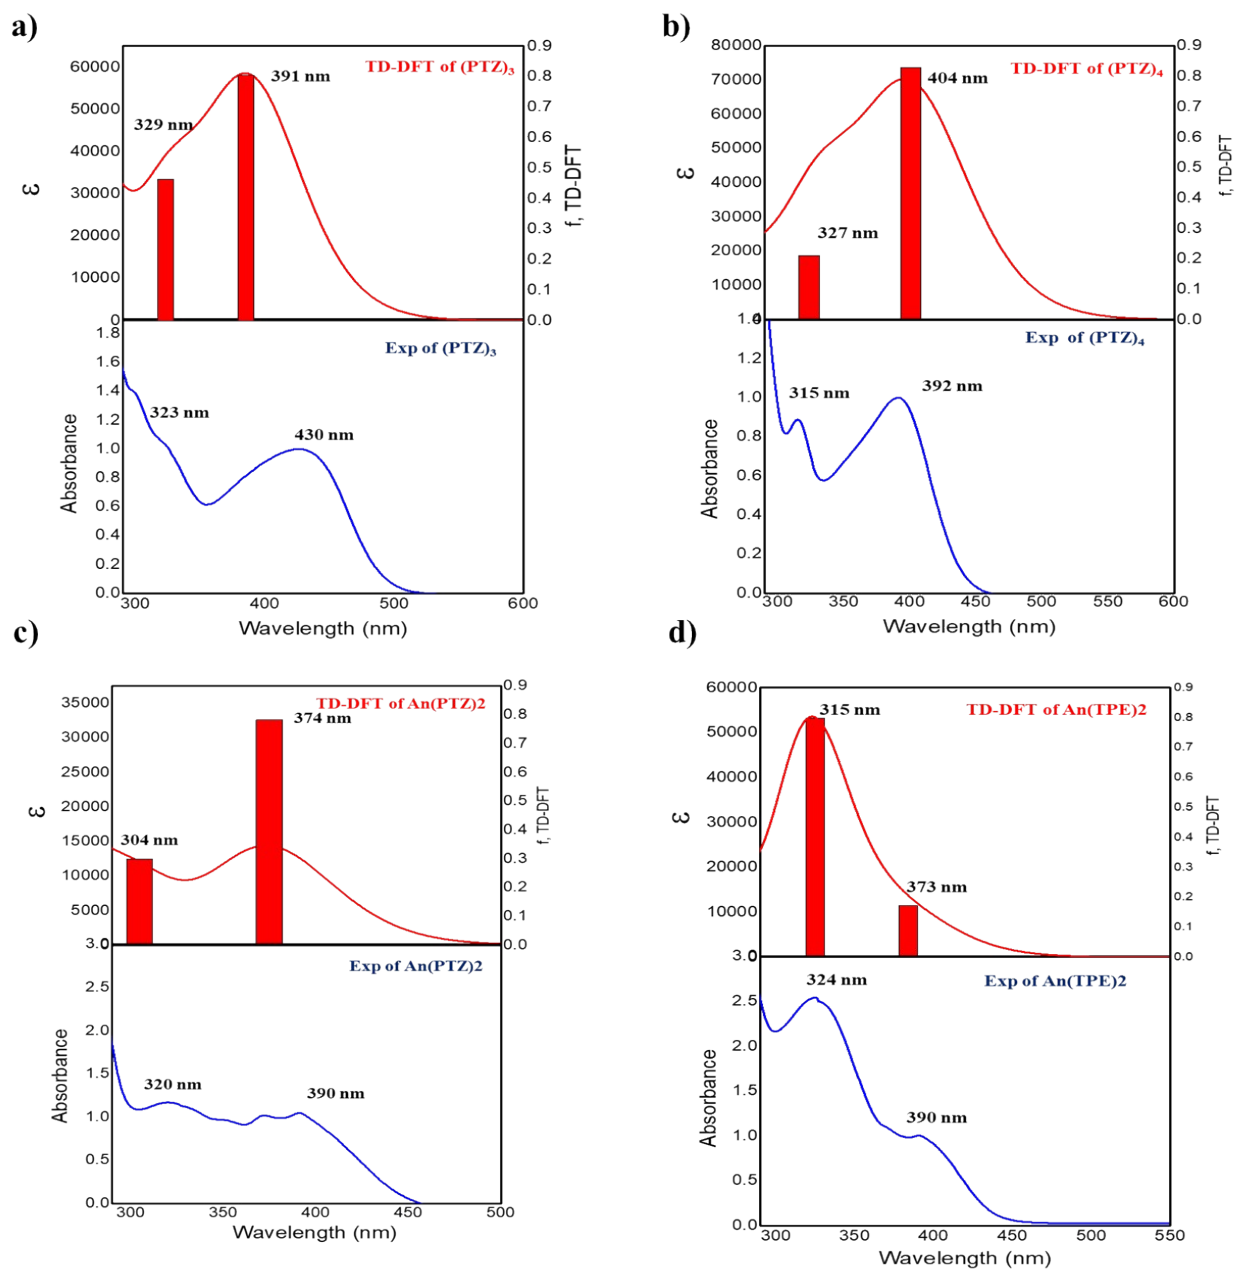

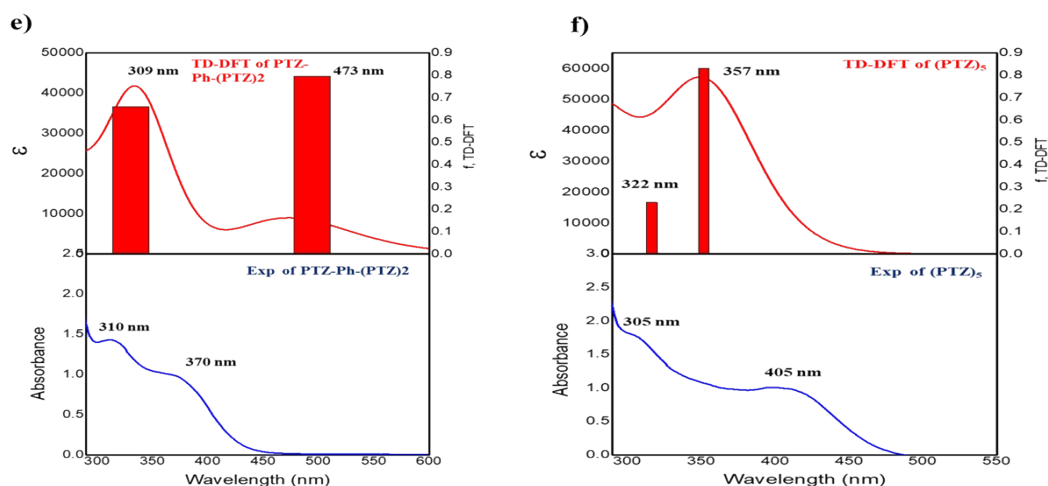

**Fig. S7.** UV-vis absorption spectra of a)  $(\text{PTZ})_3$ , b)  $(\text{PTZ})_4$ , c)  $\text{An}(\text{PTZ})_2$ , d)  $\text{An}(\text{TPE})_2$ , e)  $\text{PTZ-Ph-(PTZ)}_2$ , f)  $(\text{PTZ})_5$ . Experimental (bottom) and TD-DFT predicted (top) in the gas phase.

**Table S5** The computed vertical transitions; oscillator strengths and configurations of  $(\text{PTZ})_3$ ,  $(\text{PTZ})_4$ ,  $\text{An}(\text{PTZ})_2$ ,  $\text{An}(\text{TPE})_2$ ,  $\text{PTZ-Ph-(PTZ)}_2$ ,  $(\text{PTZ})_5$ .

| Compound                  | Wavelength<br>h (nm) | $f^a$  | Configuration                        | Assignment  |
|---------------------------|----------------------|--------|--------------------------------------|-------------|
| $(\text{PTZ})_3$          | 391                  | 1.3402 | HOMO $\rightarrow$ LUMO (44%)        | ICT         |
|                           | 329                  | 0.7733 | (HOMO-1) $\rightarrow$ LUMO (27%)    | $\pi-\pi^*$ |
| $(\text{PTZ})_4$          | 404                  | 1.5677 | HOMO $\rightarrow$ LUMO (45%)        | ICT         |
|                           | 327                  | 0.4010 | (HOMO-2) $\rightarrow$ LUMO (26%)    | $\pi-\pi^*$ |
| $\text{An}(\text{PTZ})_2$ | 374                  | 0.3481 | HOMO $\rightarrow$ LUMO (40%)        | ICT         |
|                           | 304                  | 0.1330 | (HOMO-1) $\rightarrow$ (LUMO+1)(15%) | $\pi-\pi^*$ |
| $\text{An}(\text{TPE})_2$ | 373                  | 0.2502 | HOMO $\rightarrow$ LUMO (44%)        | ICT         |
|                           | 315                  | 1.1534 | (HOMO-1) $\rightarrow$ (LUMO+2)(17%) | $\pi-\pi^*$ |
| $(\text{PTZ})_5$          | 357                  | 1.2012 | HOMO $\rightarrow$ LUMO (36%)        | ICT         |
|                           | 322                  | 0.3359 | HOMO $\rightarrow$ (LUMO+1) (26%)    | $\pi-\pi^*$ |
| $\text{PTZ-Ph-(PTZ)}_2$   | 473                  | 0.2211 | HOMO $\rightarrow$ LUMO (17%)        | ICT         |
|                           | 309                  | 0.1836 | (HOMO-1) $\rightarrow$ LUMO (20%)    | $\pi-\pi^*$ |

<sup>a</sup>Oscillator strength.

## Thermal properties

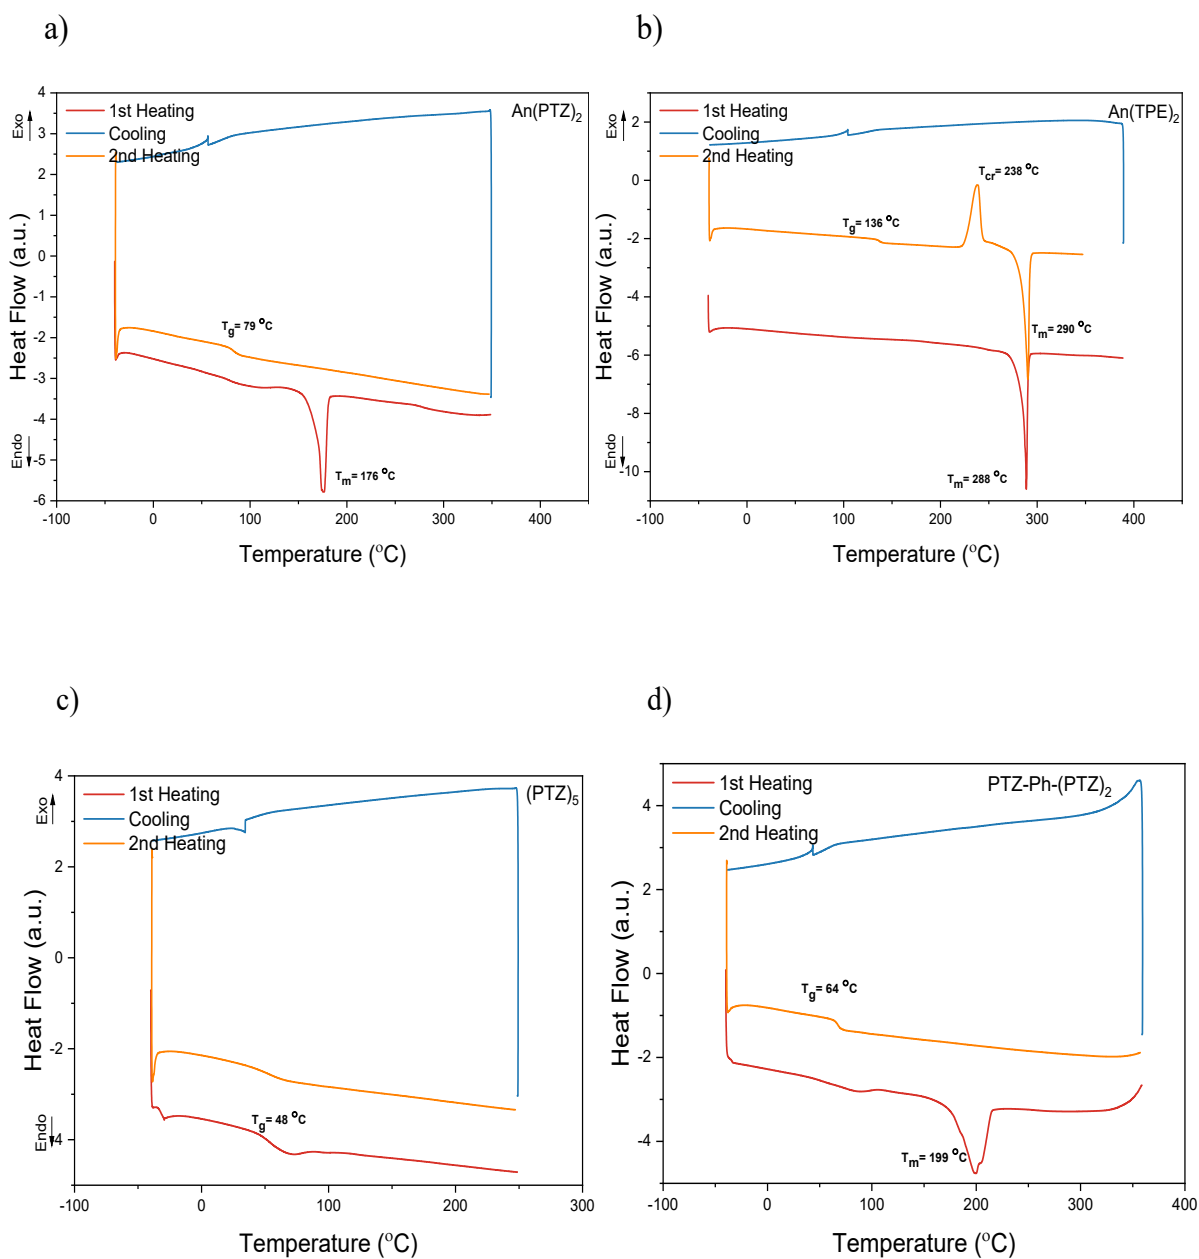

**Fig. S8.** Differential scanning calorimetry (DSC) plots of compounds. Photoelectron emission spectra for vacuum-deposited films of  $\text{An}(\text{PTZ})_2$  (a),  $\text{An}(\text{TPE})_2$  (b),  $(\text{PTZ})_5$  (c), and  $\text{PTZ-Ph}-(\text{PTZ})_2$  (d)

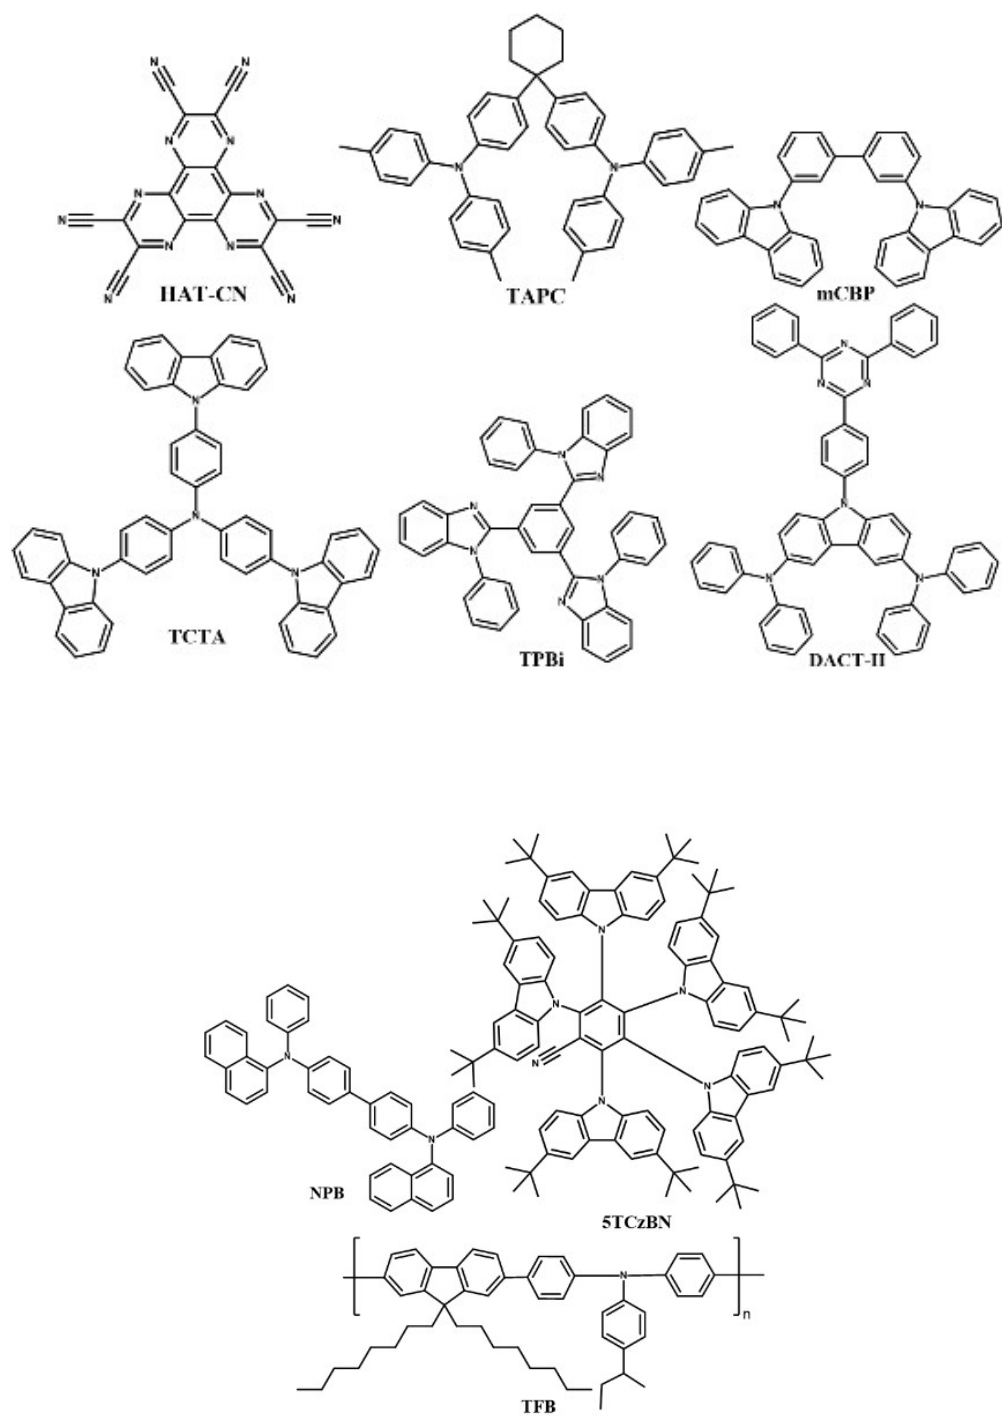

**Fig. S9.** The chemical structure of compounds used for fabrication of OLEDs.

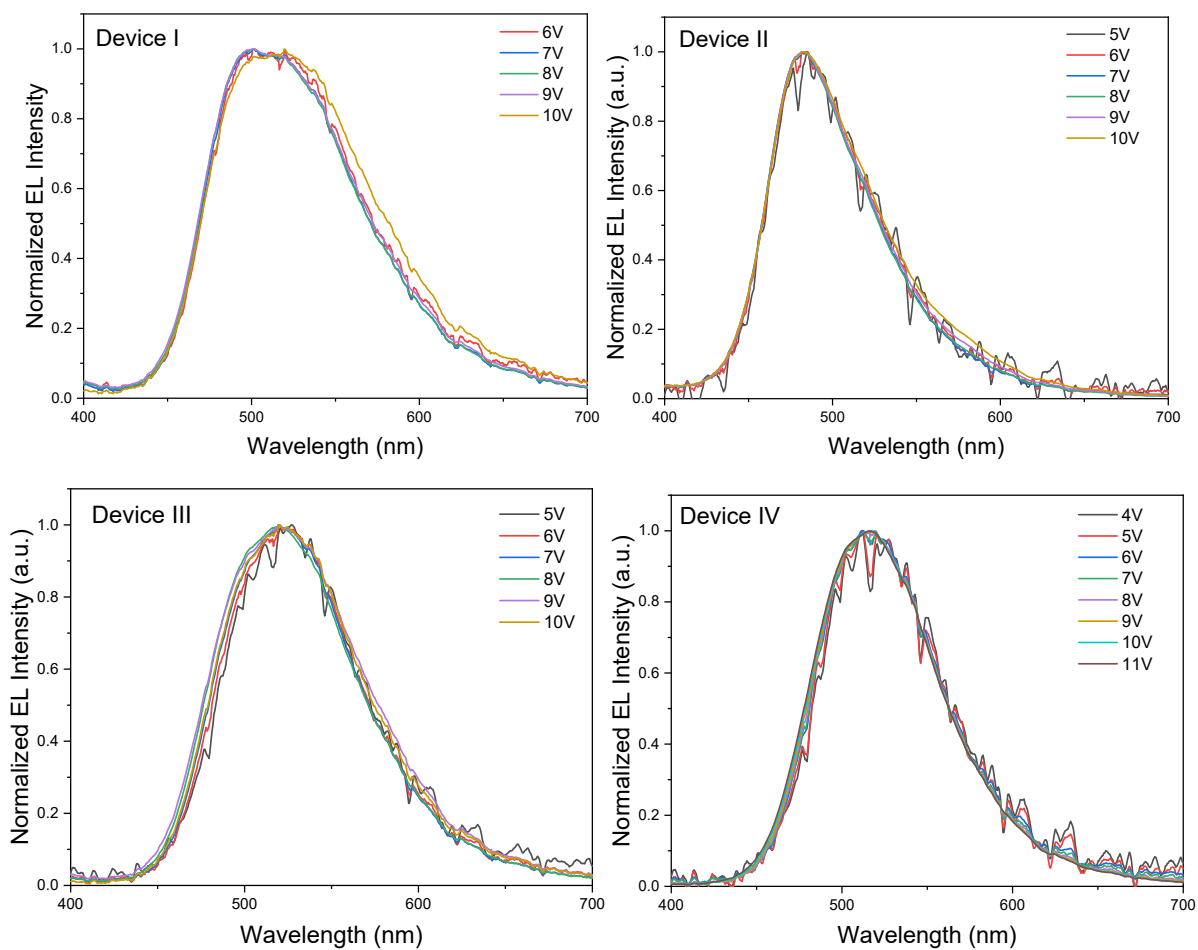

**Fig. S10.** Normalized EL spectra of devices I-IV.

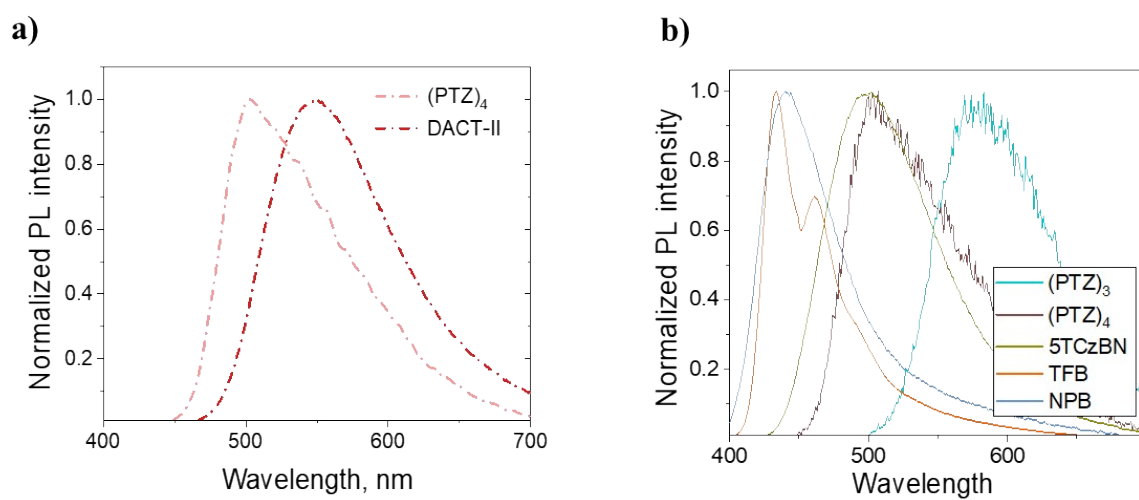

**Fig. S11.** The chemical structure of compounds used for fabrication of OLEDs.

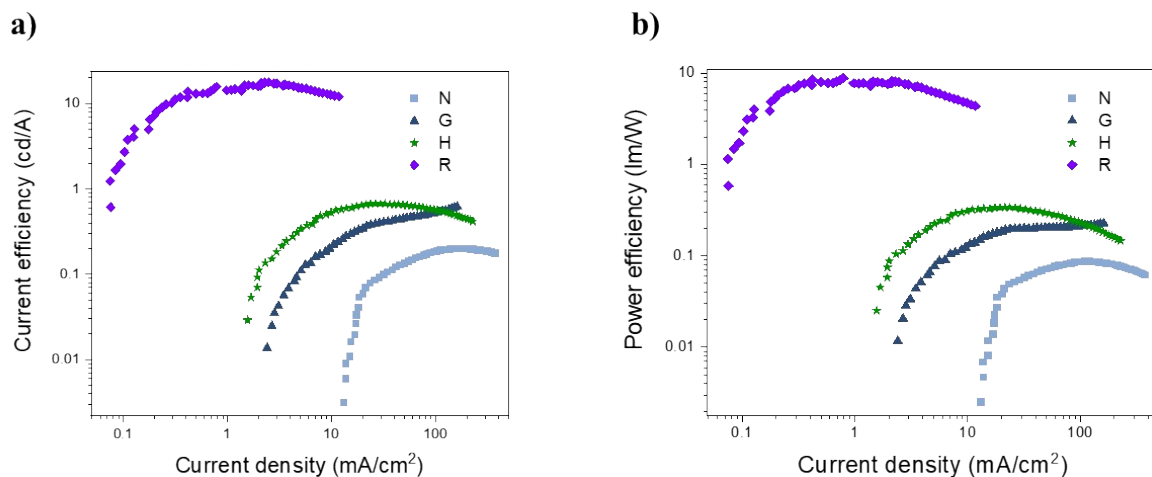

Fig. S12. Current density (a) and power efficiency (b) as a function of current density of devices I-IV.

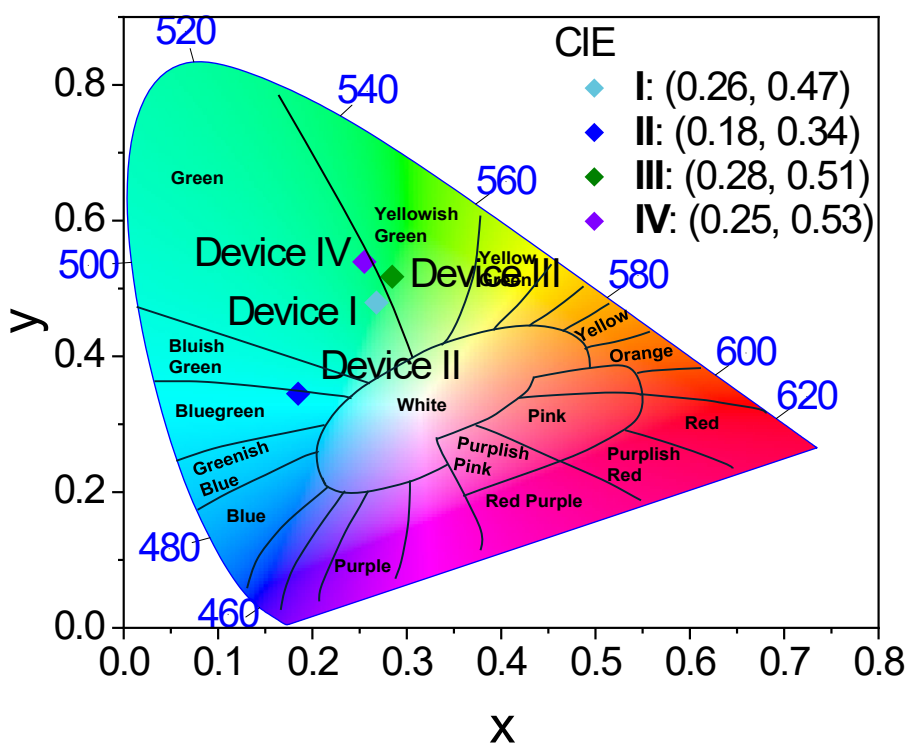

Fig. S13. CIE coordinates of devices I-IV.

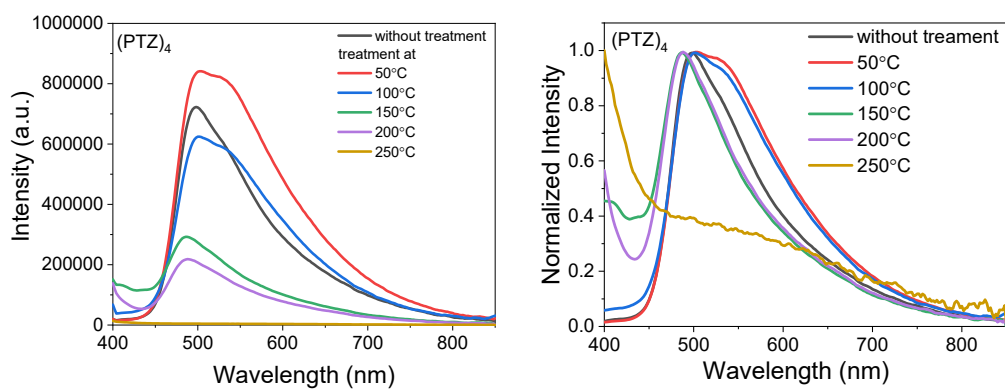

a)

b)

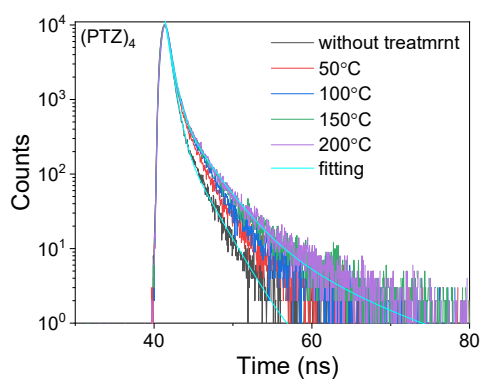

c)

**Figure S14.** Non-normalised (a) and normalised (b) PL spectra and PL decay curves (c) of the spin-coated film  $(PTZ)_4$  before and after thermal treatments at different temperatures.

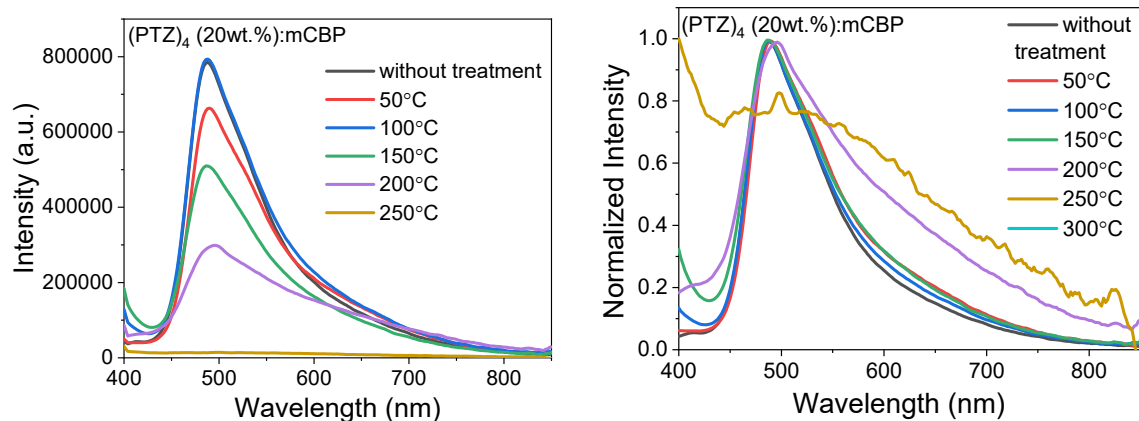

a)

b)

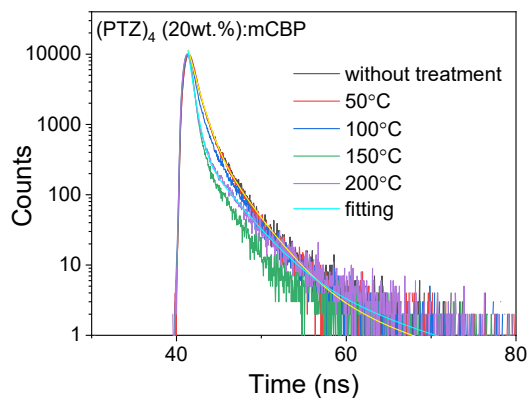

c)

**Figure S15.** Non-normalised (a) and normalised (b) PL spectra and PL decay curves (c) of the spin-coated film of 20% solid solution of  $(PTZ)_4$  in mCBP before and after thermal treatments at the different temperatures.

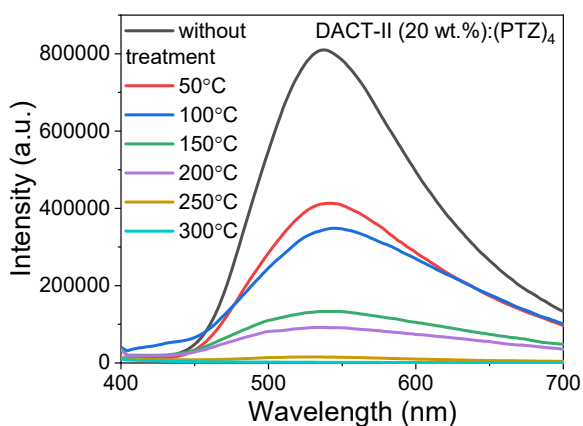

a)

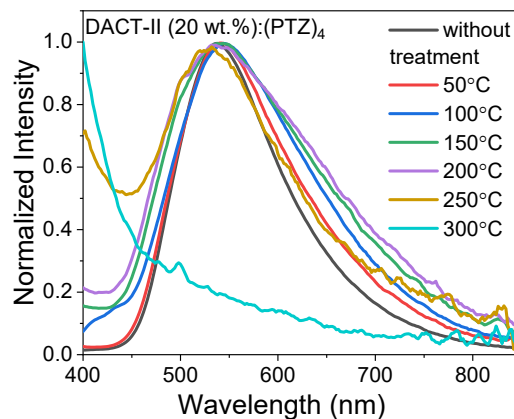

b)

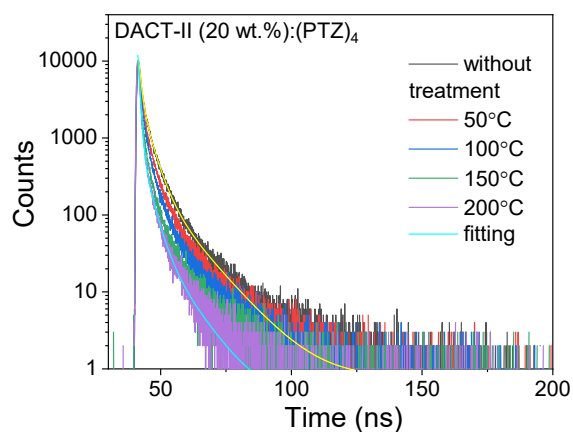

c)

**Figure S16.** Non-normalised (a) and normalised (b) PL spectra and PL decay curves (c) of the spin-coated film of 20% solid solution of DACT-II dispersed in (PTZ)<sub>4</sub> as the host before and after thermal treatments at the different temperatures.

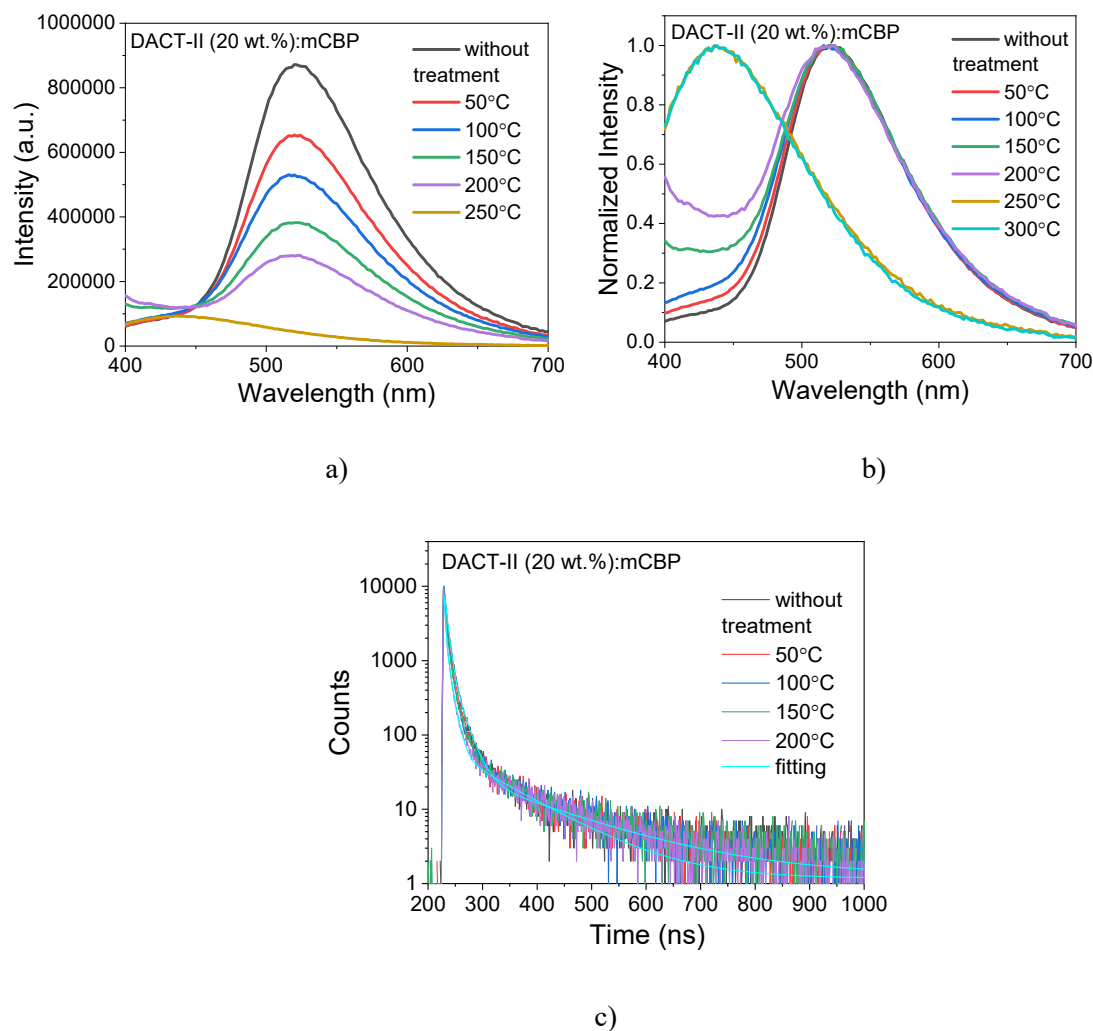

**Figure S17.** Non-normalised (a) and normalised (b) PL spectra and PL decay curves (c) of the spin-coated film of the 20% solid solution of DACT-II in mCBP before and after thermal treatments at the different temperatures.

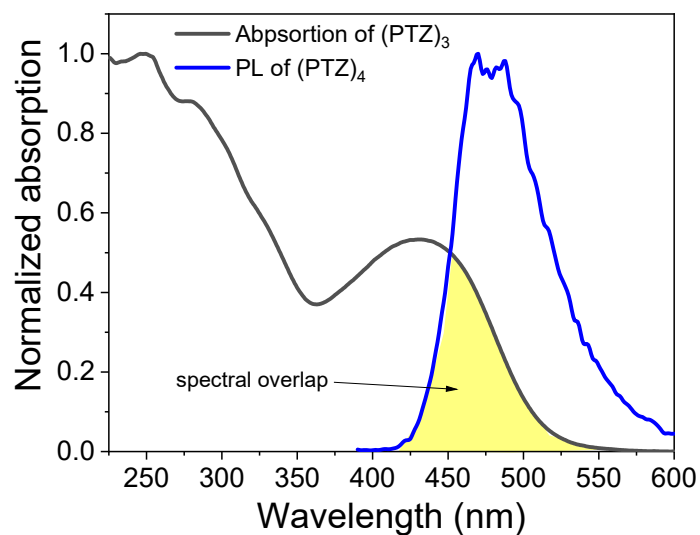

**Figure S18.** Normalised absorption spectrum of neat films of (PTZ)<sub>3</sub> and PL spectrum of 1% solid dispersion of compound (PTZ)<sub>4</sub> in Zeonex. The yellow area is related to the spectral overlap.

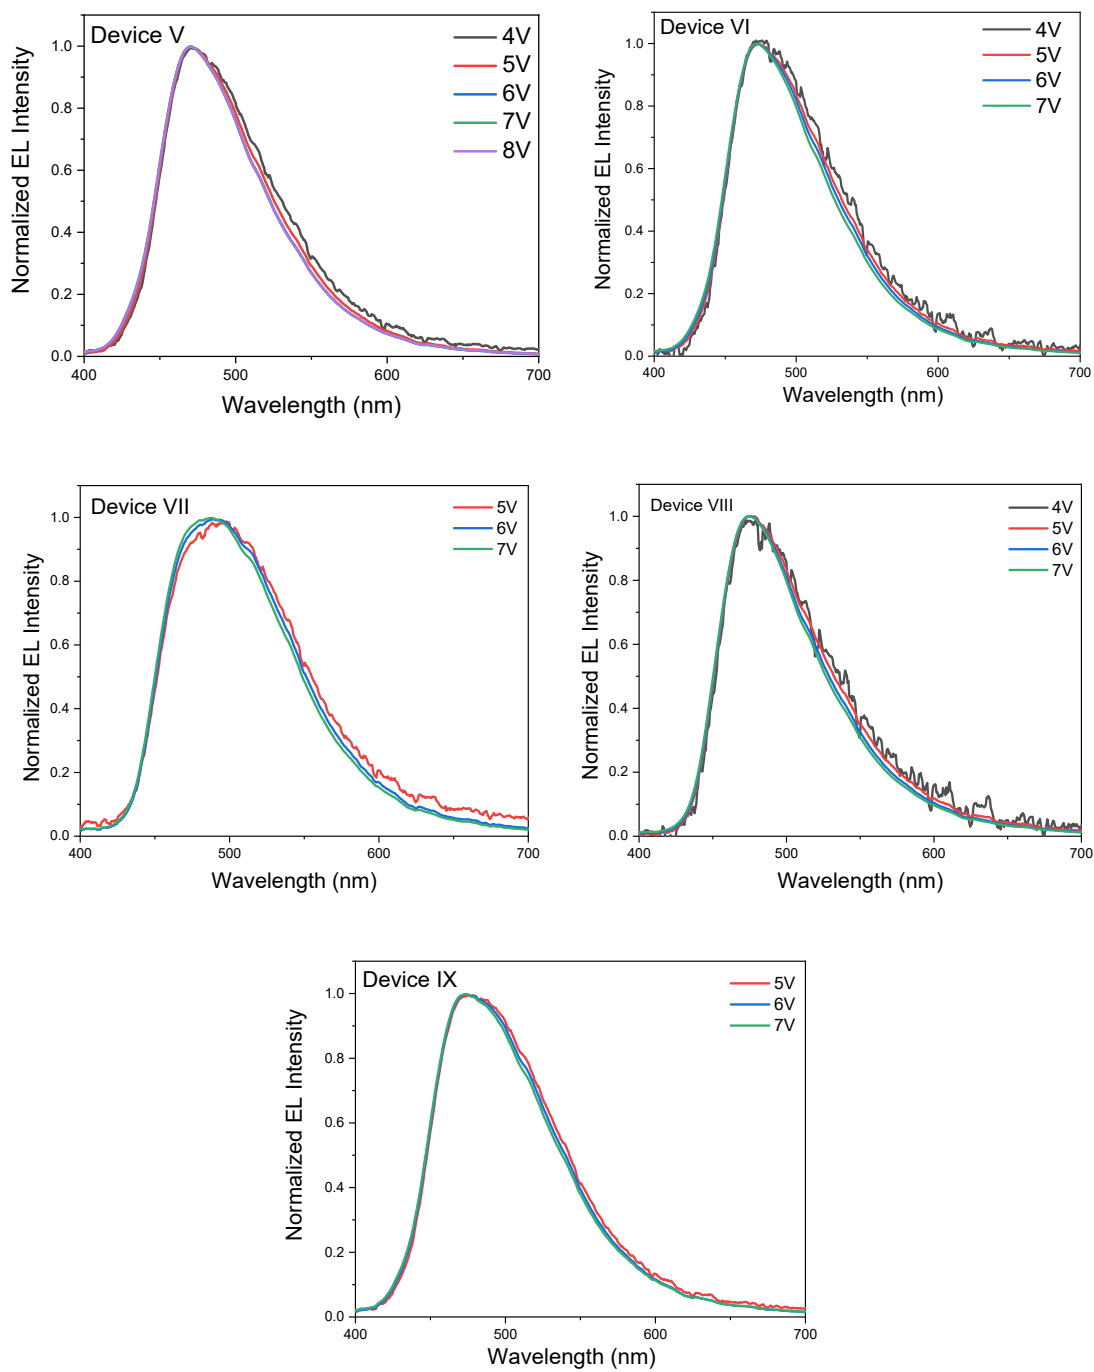

**Fig. S19.** Normalized EL spectra of devices V-IX.

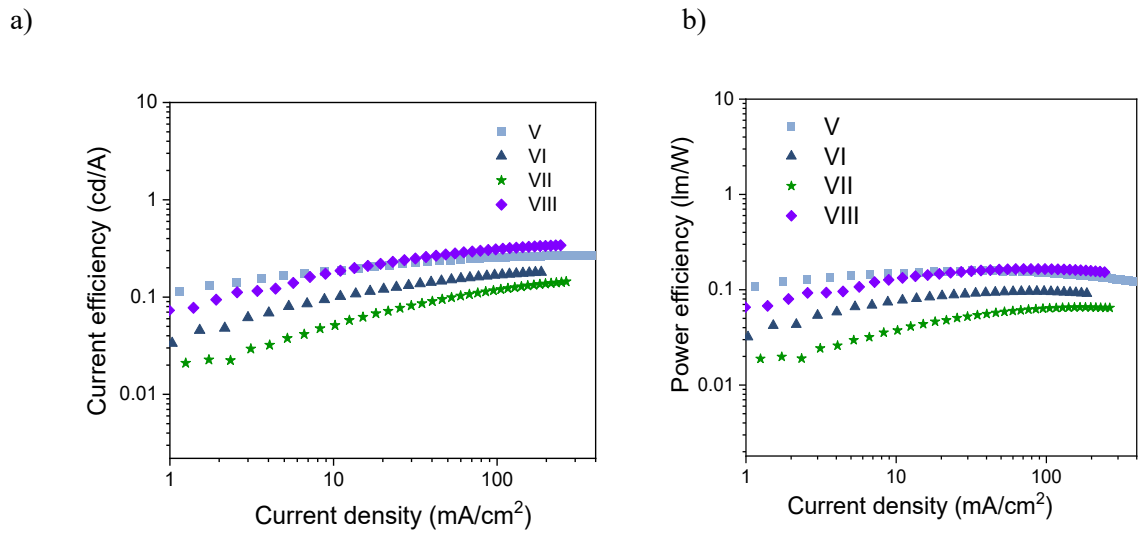

Fig. S20. Current density (a) and power efficiency (b) as a function of current density of devices V-VIII.

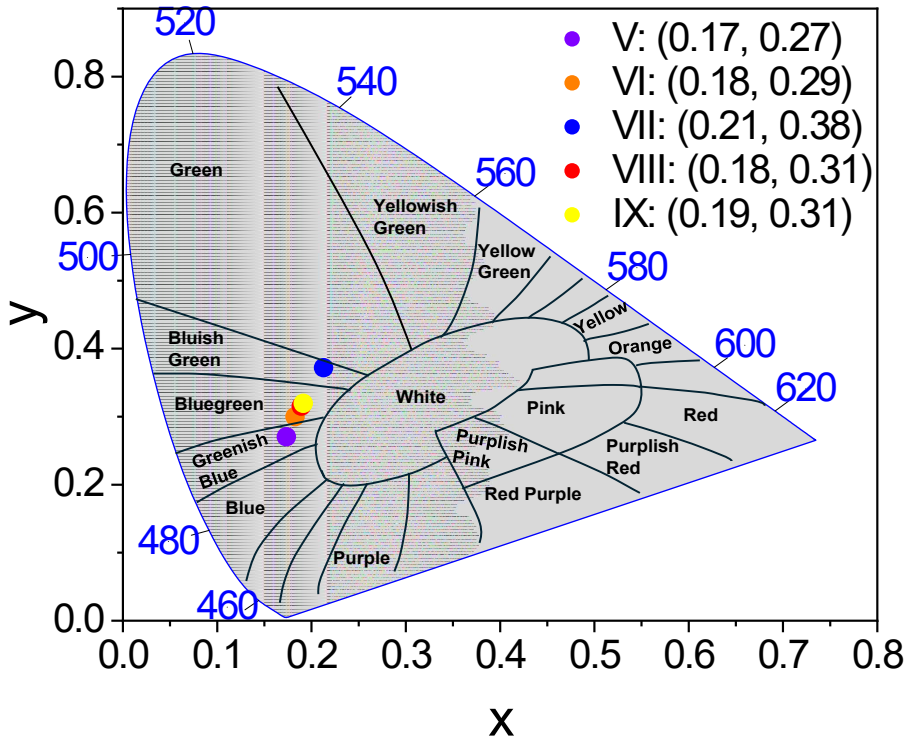

Fig. S21. CIE coordinates of devices V-IX.

**Table S6.** Different ratios of each compound dissolved and mixed for EMLs of devices V-IX.

| <b>Compounds</b> | <b>(PTZ)<sub>3</sub><br/>(orange)</b> | <b>(PTZ)<sub>4</sub><br/>(Blue)</b> | <b>5TCzBN</b> | <b>NPB</b> |
|------------------|---------------------------------------|-------------------------------------|---------------|------------|
| <b>V</b>         | (1%)                                  | (5%)                                | (10%)         | (84%)      |
| <b>VI</b>        | (3%)                                  | (15%)                               | (20%)         | (72%)      |
| <b>VII</b>       | (10%)                                 | -                                   | (20%)         | (70%)      |
| <b>VIII</b>      | -                                     | (10%)                               | (20%)         | (70%)      |
| <b>IX</b>        | (10%)                                 | (10%)                               | (10%)         | (70%)      |

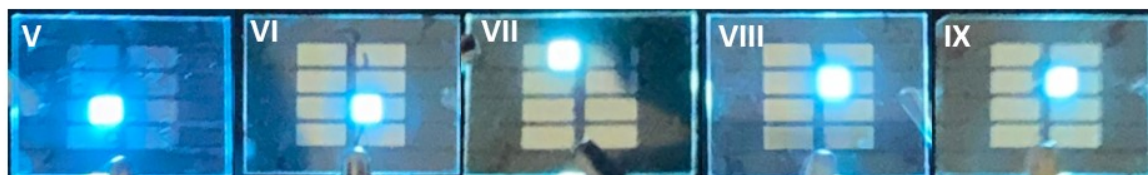

**Fig. S22.** Photos of solution-processable OLEDs V-IX at 7V.

# Copies of NMR and HRMS spectra of new compounds

$^1\text{H}$  NMR and  $^{13}\text{C}$  NMR of (PTZ)<sub>3</sub>

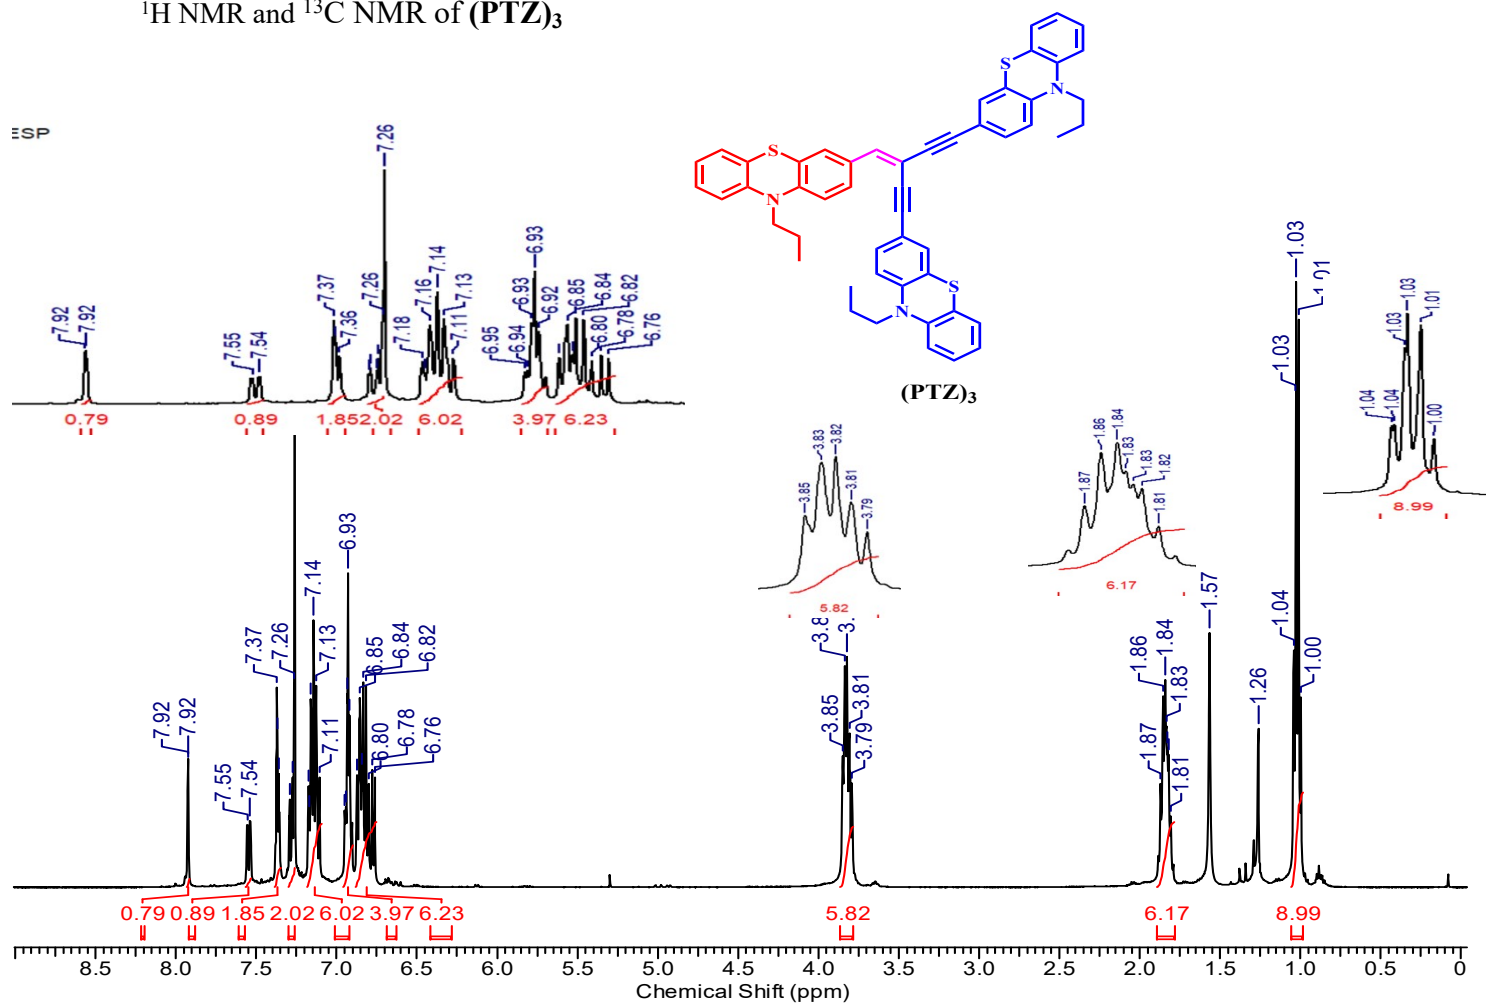

RM-RG-C51 FINAL.ESP

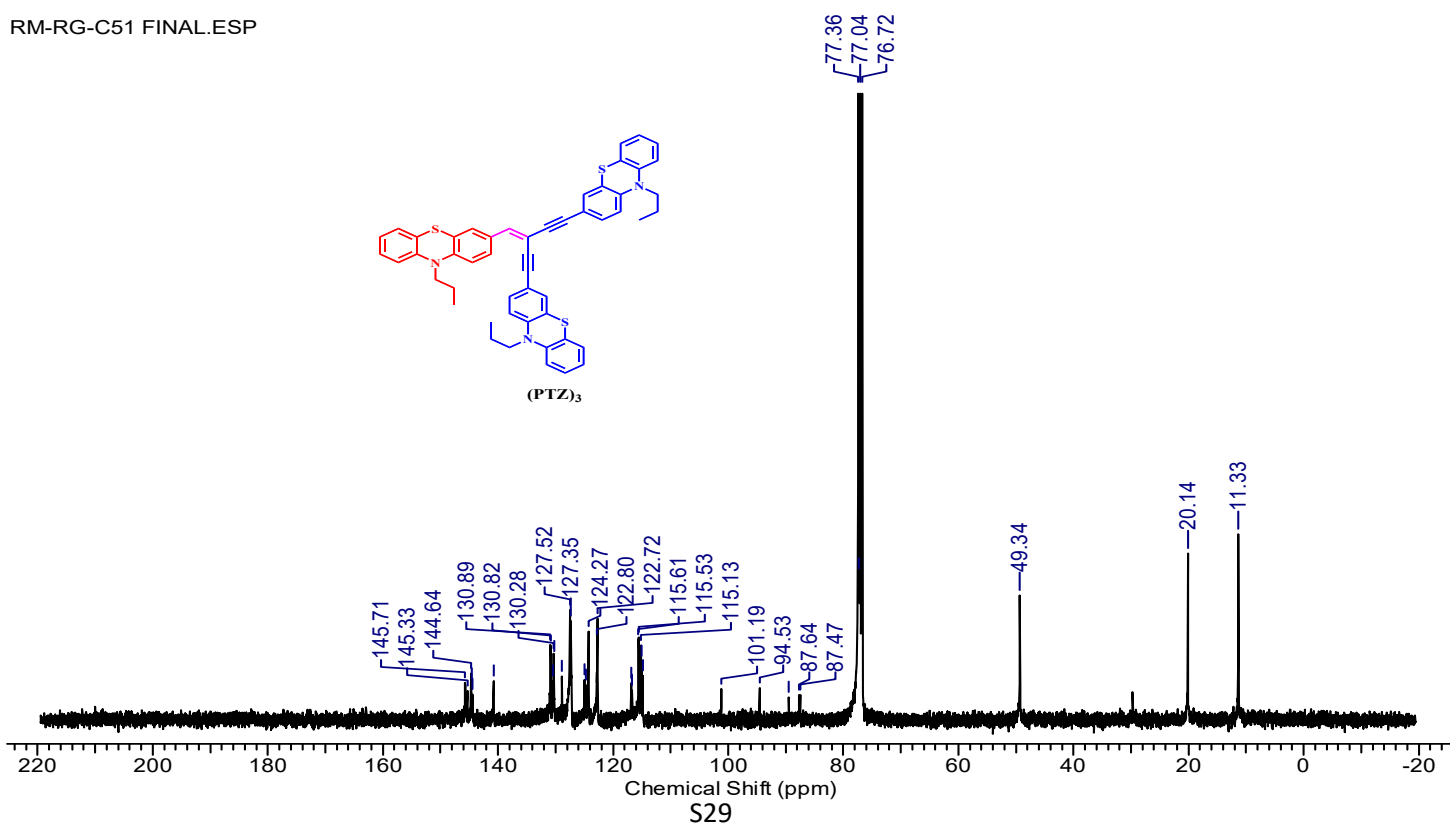

S29

# $^1\text{H}$ NMR and $^{13}\text{C}$ NMR of $\text{An}(\text{PTZ})_2$

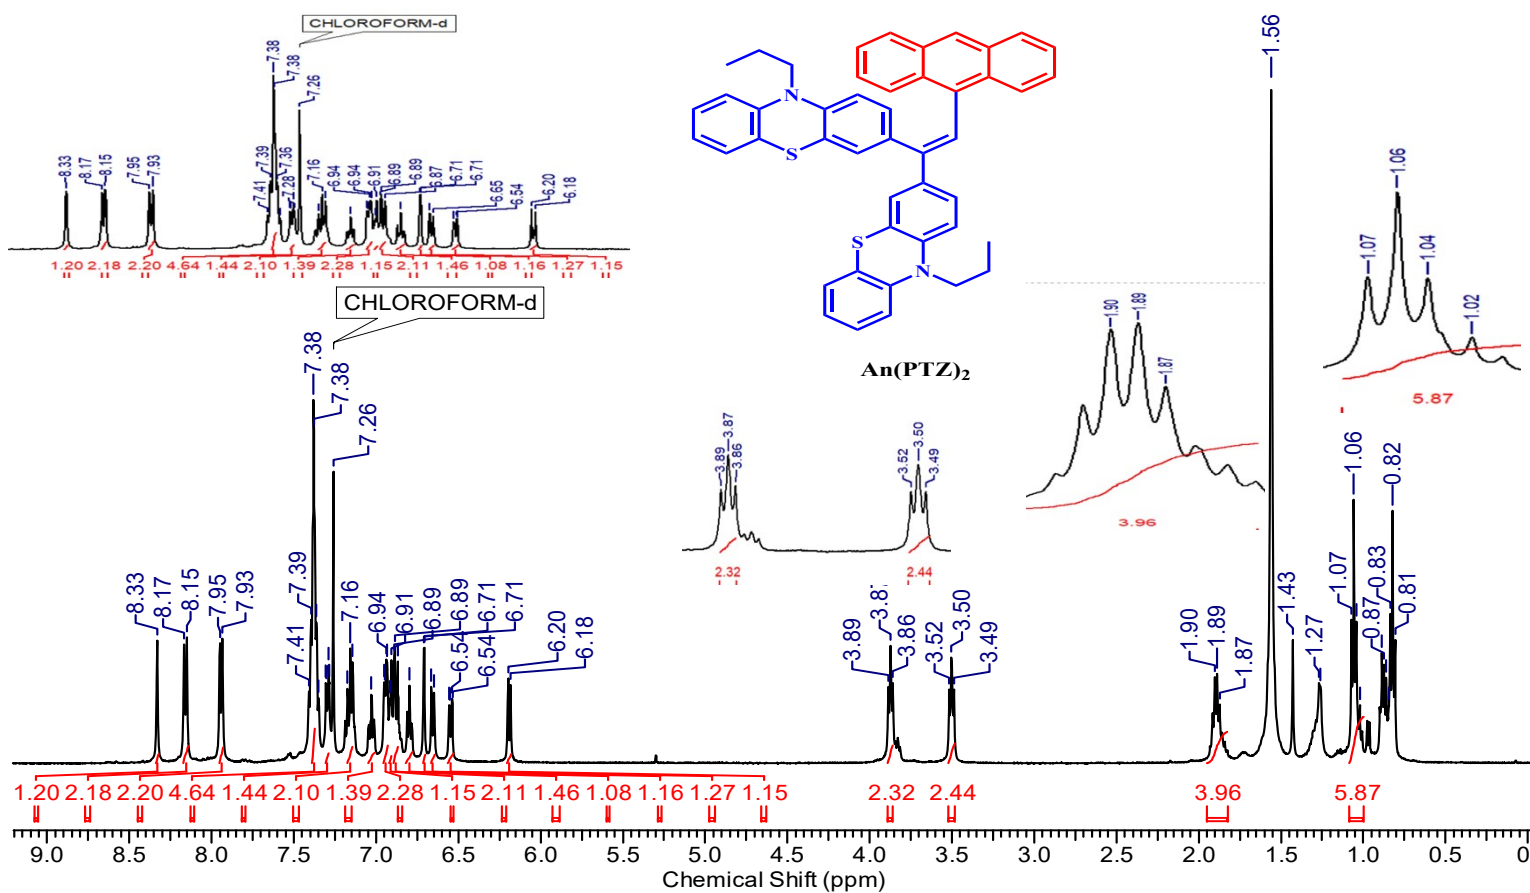

RM-RG-C52.ESP

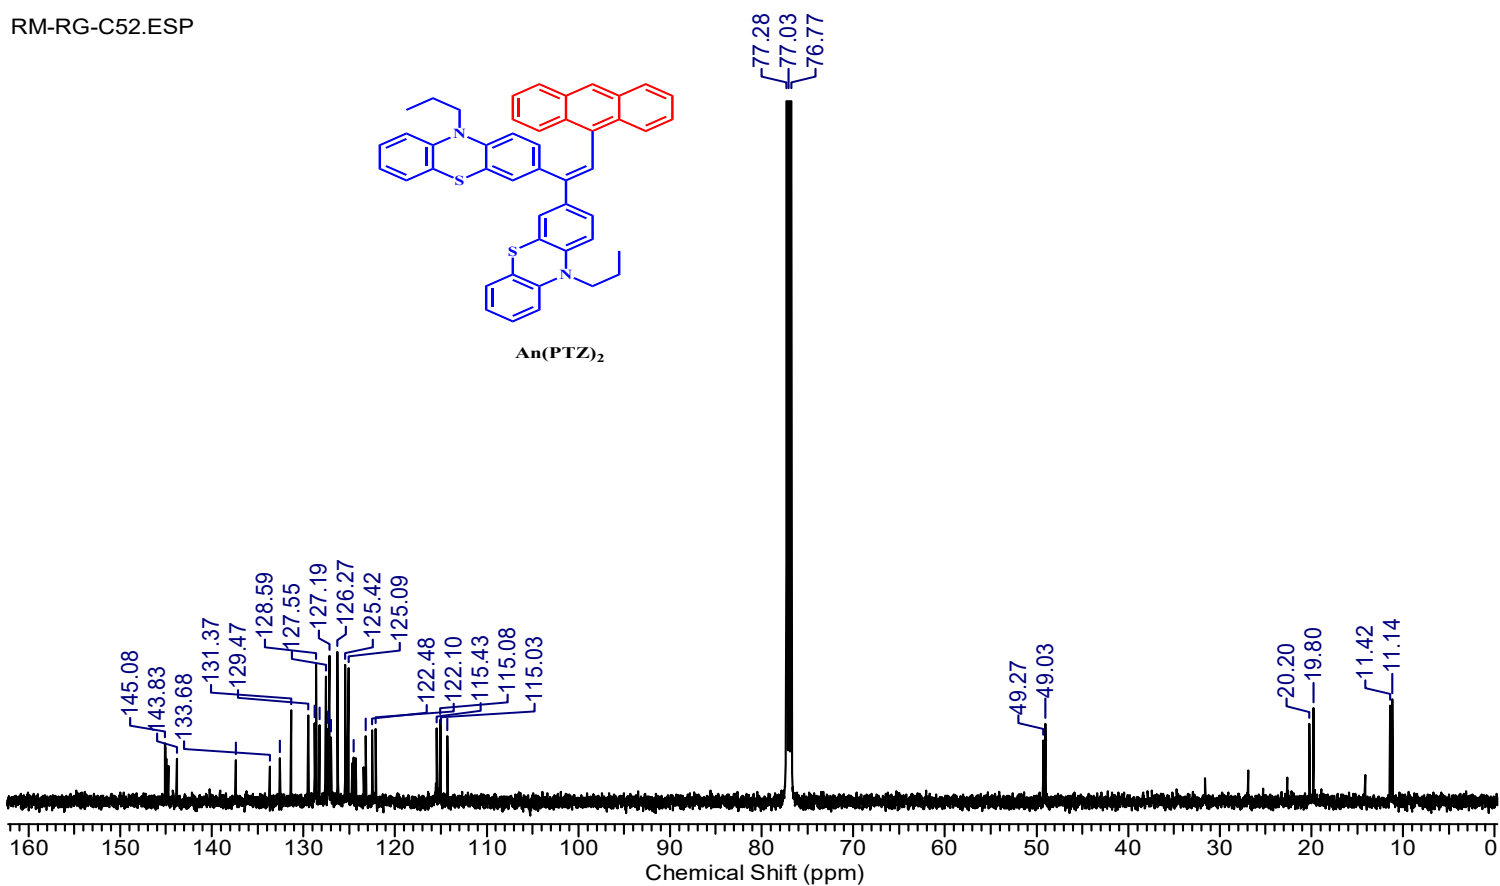

# $^1\text{H}$ NMR and $^{13}\text{C}$ NMR of $\text{An}(\text{TPE})_2$

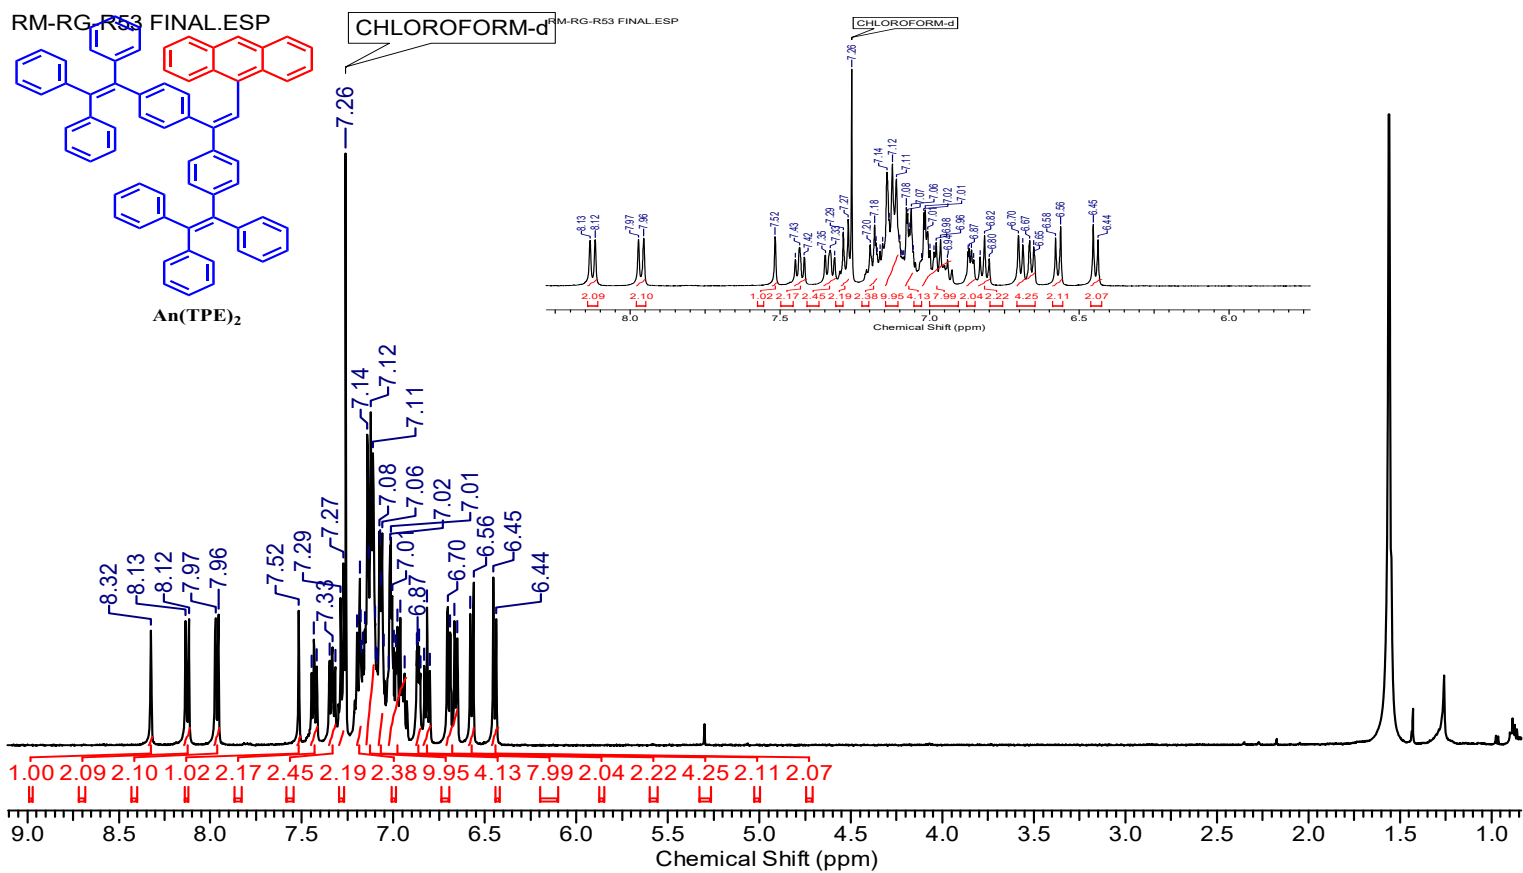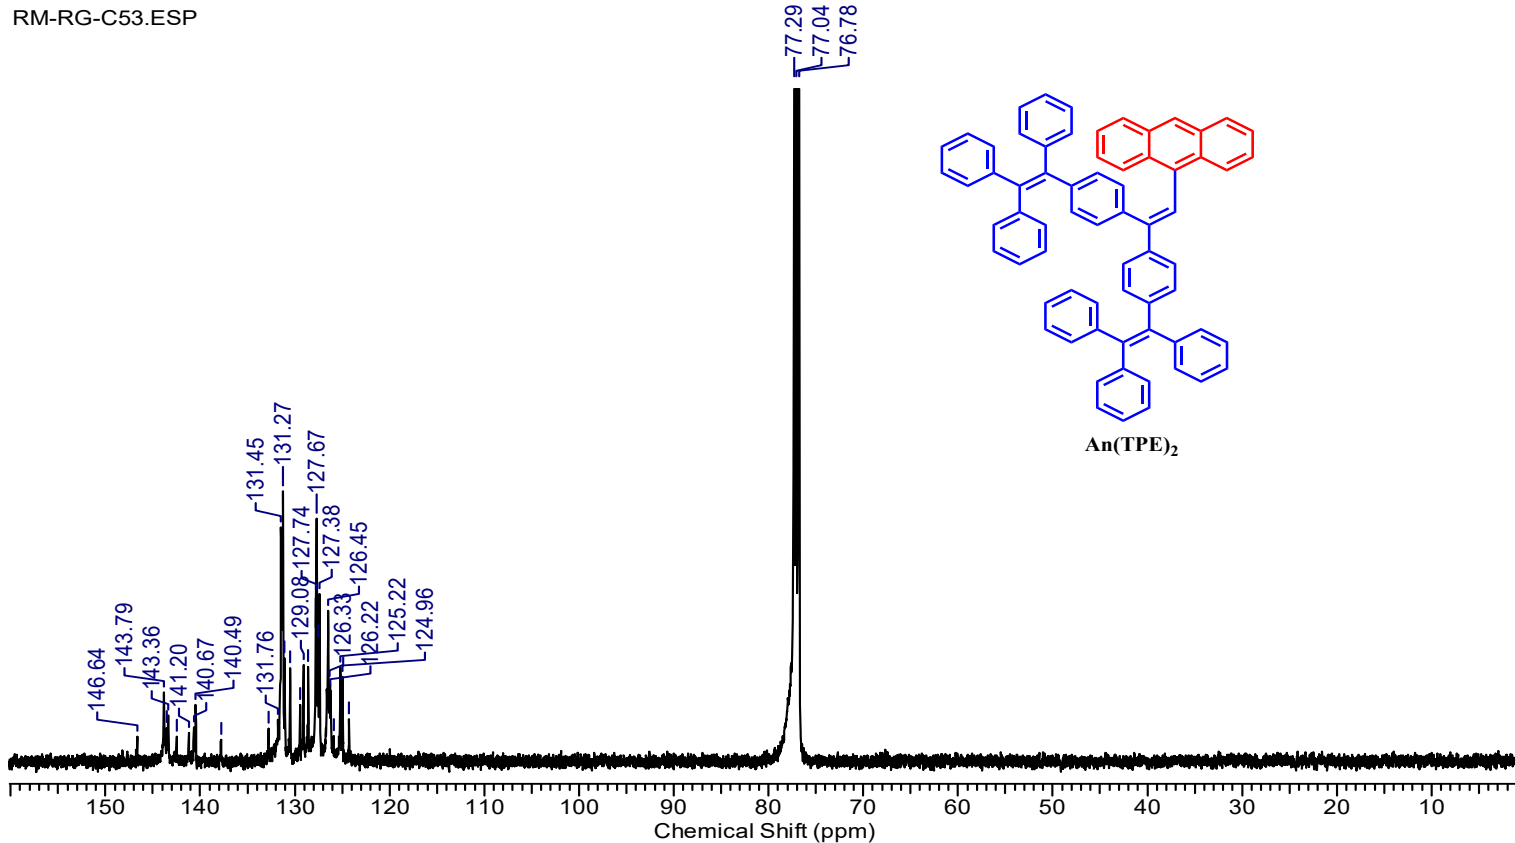

# $^1\text{H}$ NMR and $^{13}\text{C}$ NMR of (PTZ) $_4$

RM-RG-56A.ESP

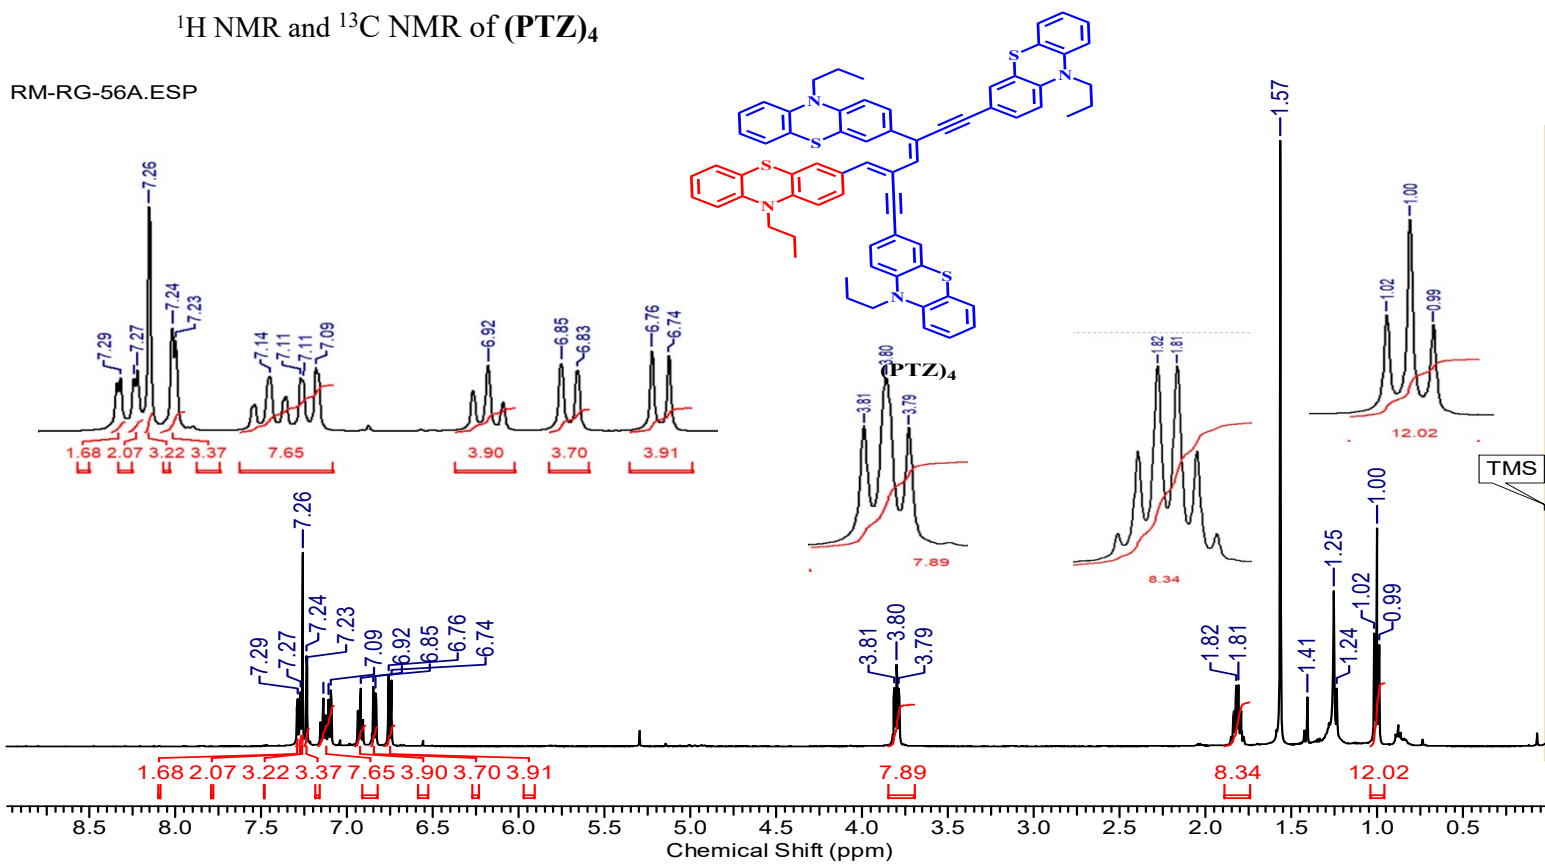

RM-RG-C56.ESP

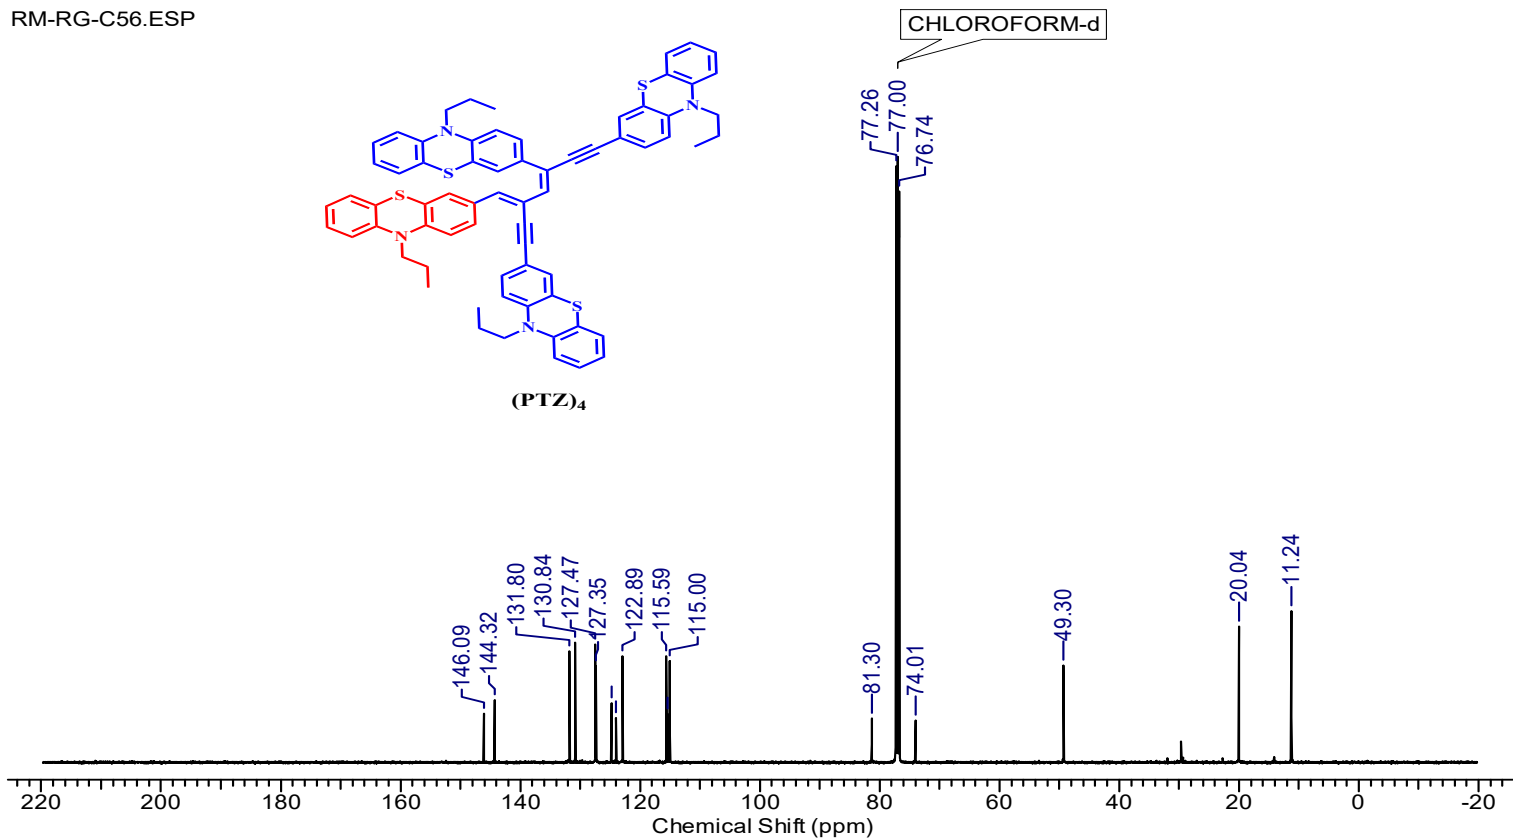

# $^1\text{H}$ NMR and $^{13}\text{C}$ NMR of (PTZ)<sub>5</sub>

RM-RG-58.ESP

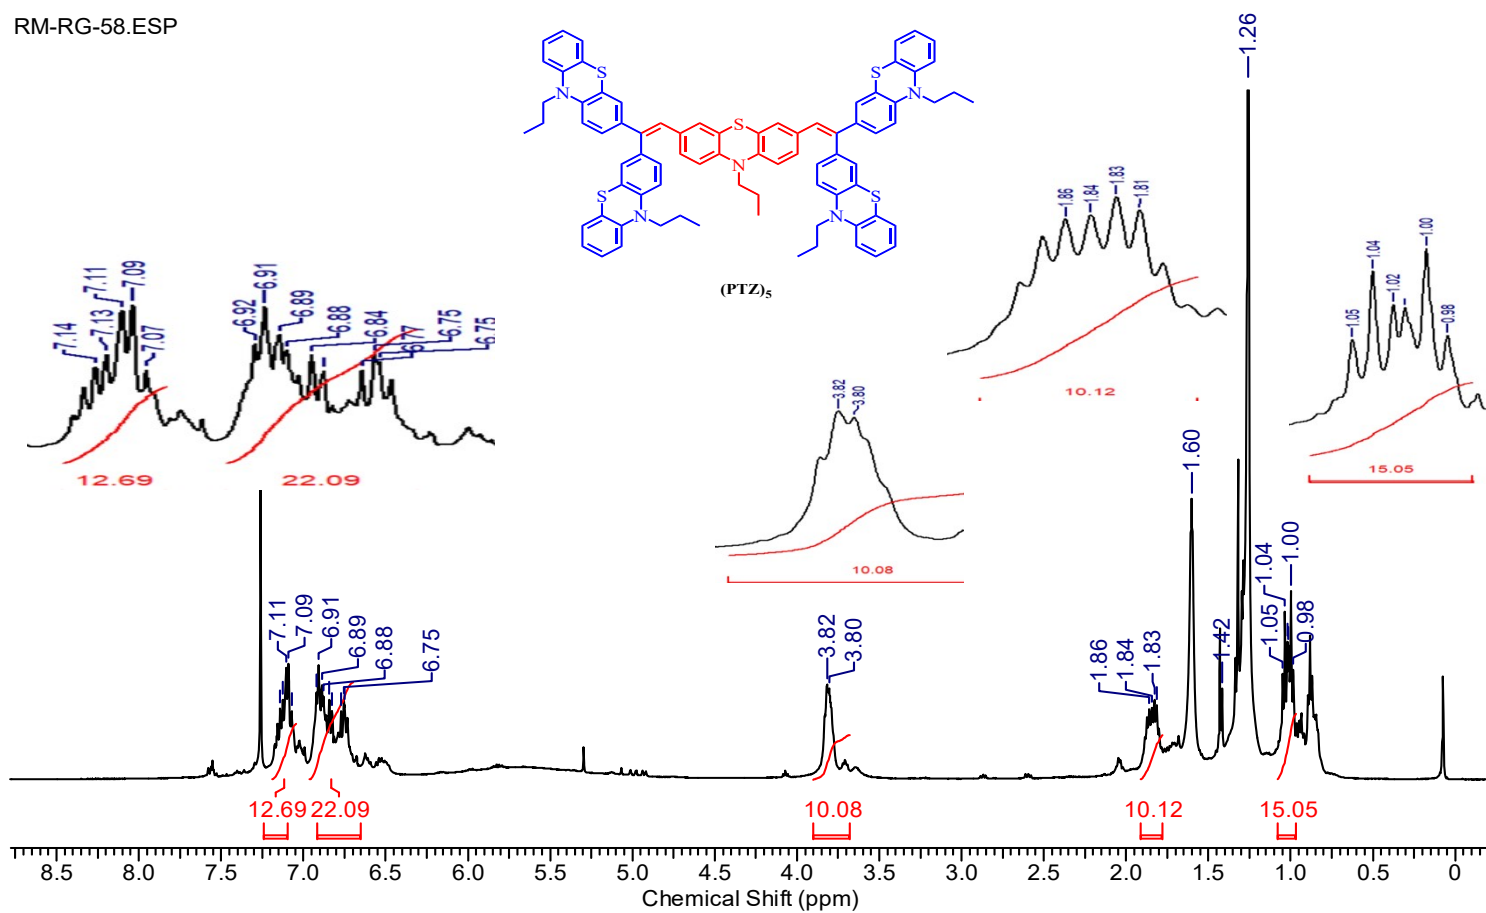

RM-RG-RC-58.ESP

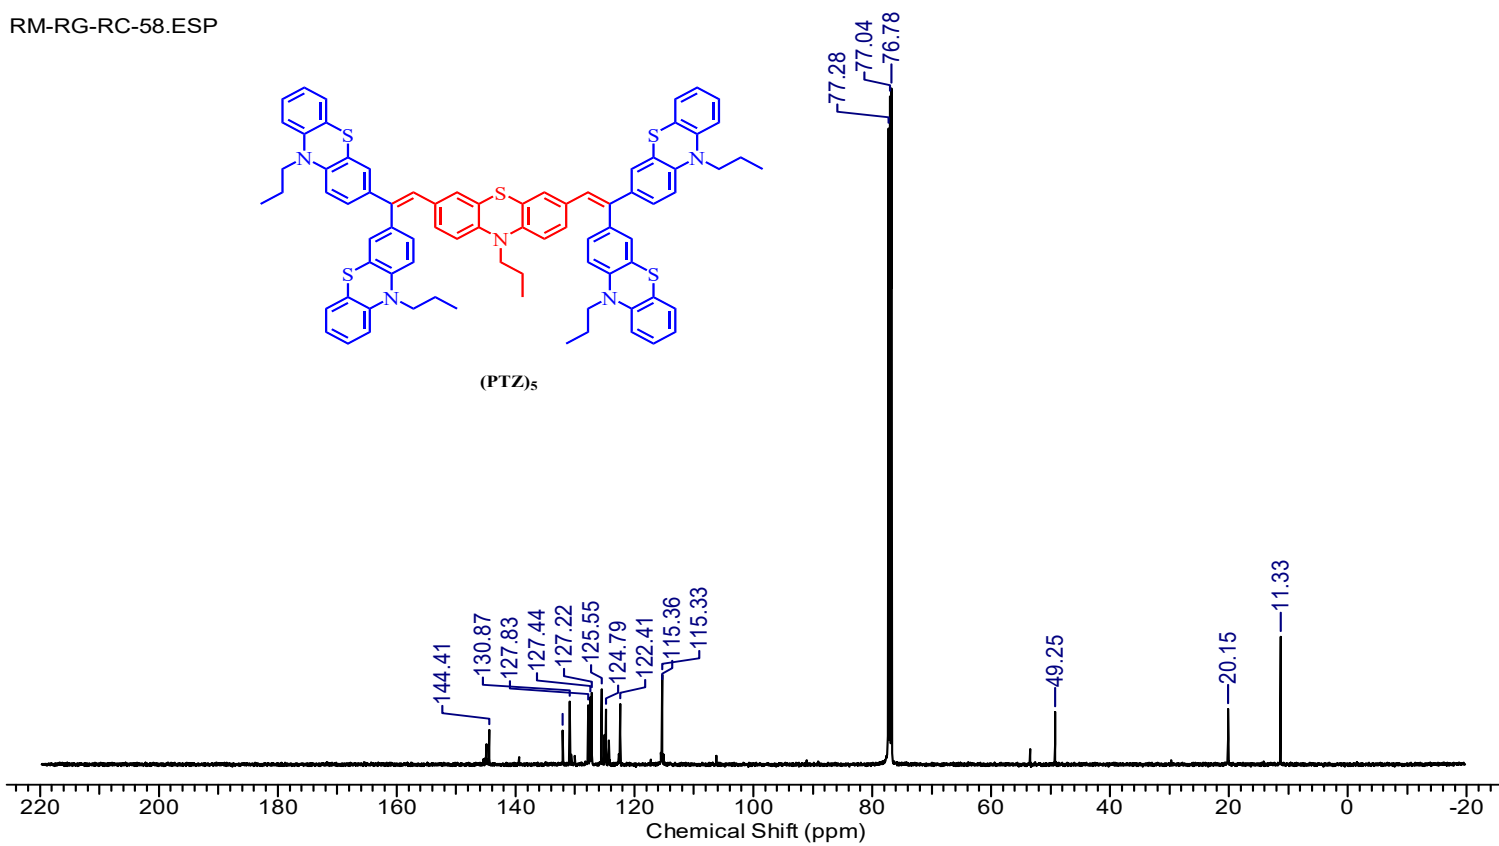

# <sup>1</sup>H NMR and <sup>13</sup>C NMR of PTZ-Ph-(PTZ)<sub>2</sub>

RM-RG-63F.FID.SP

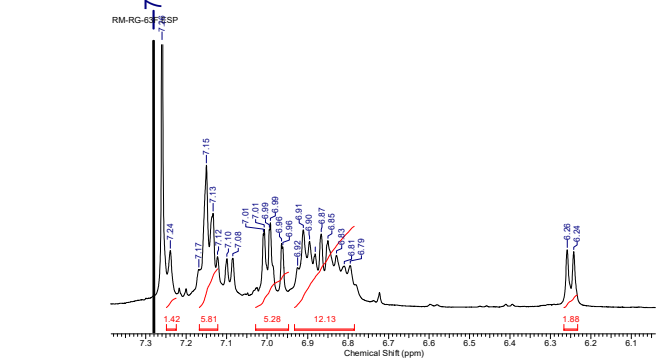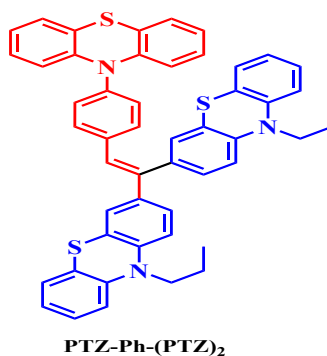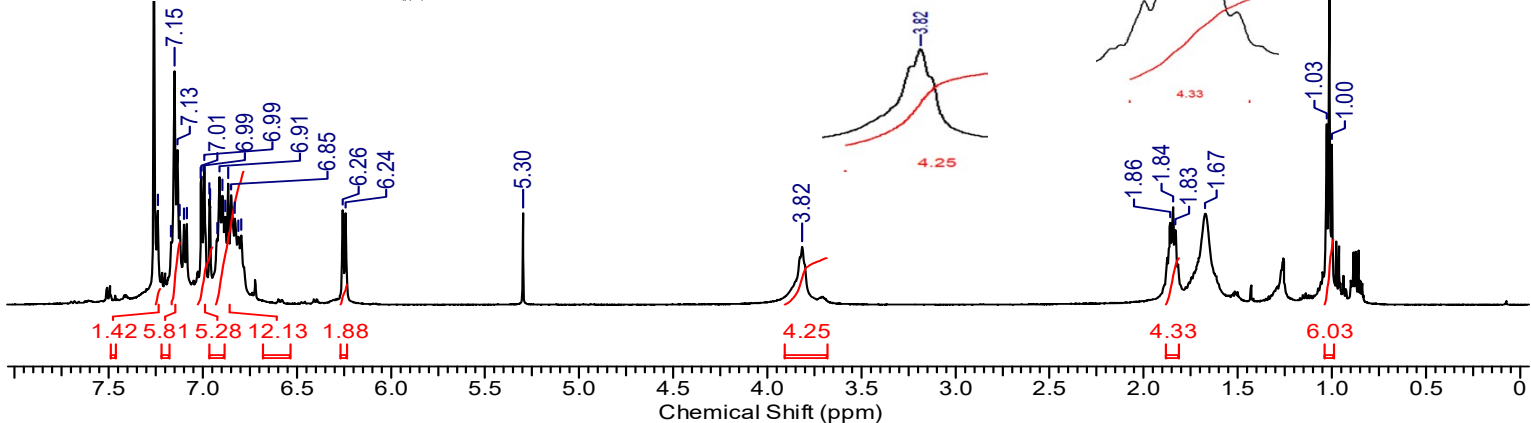

RM-RG-63 FINAL.ESP

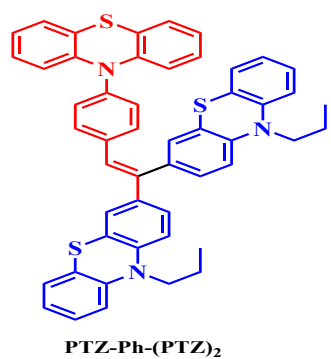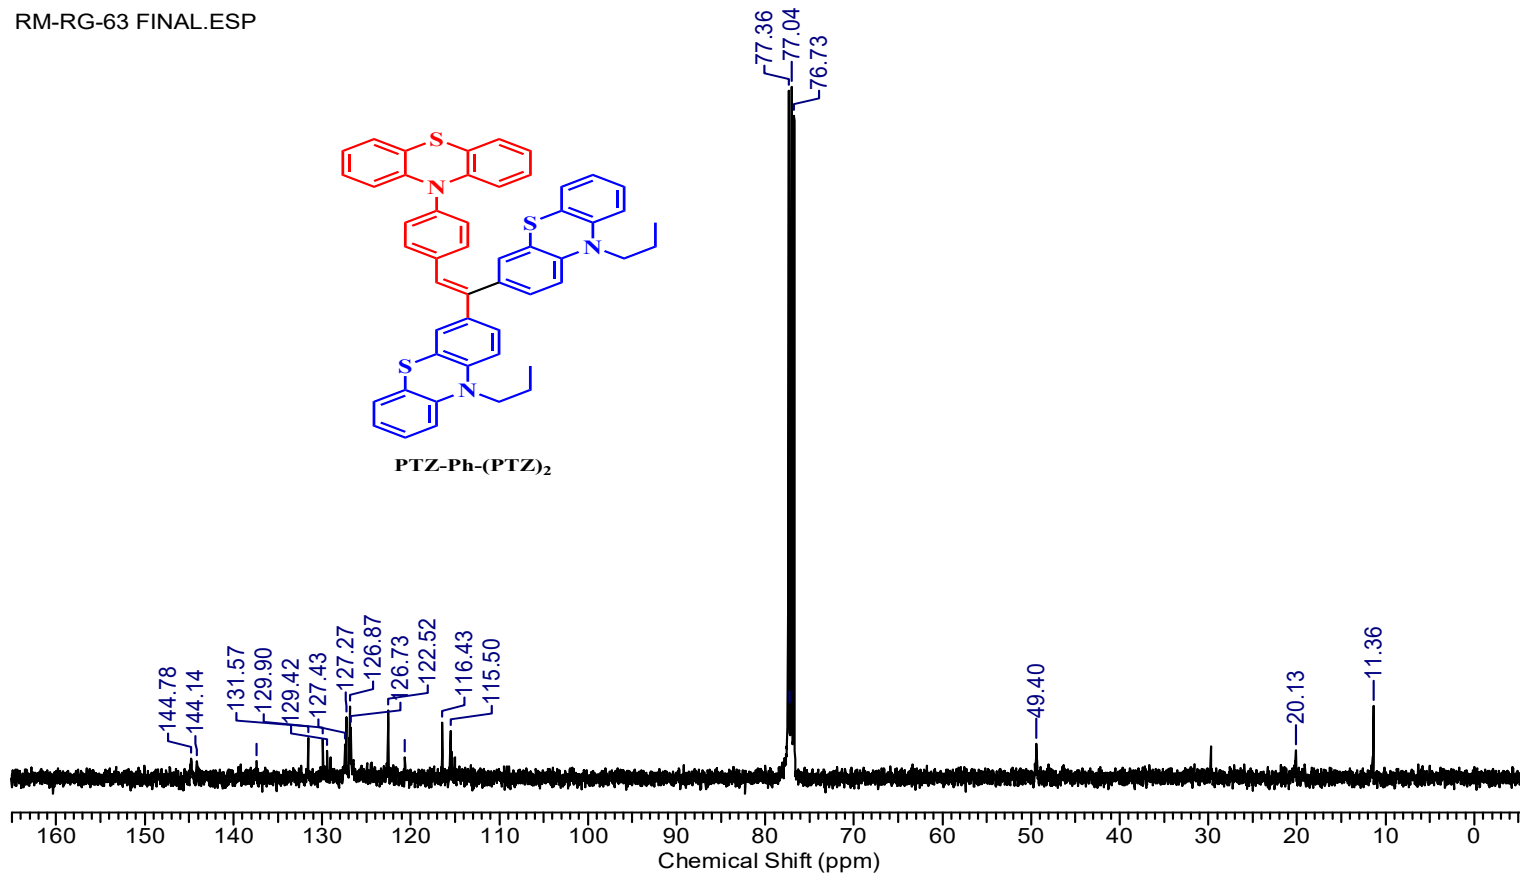

## HRMS of (PTZ)<sub>3</sub>, and An(PTZ)<sub>2</sub>

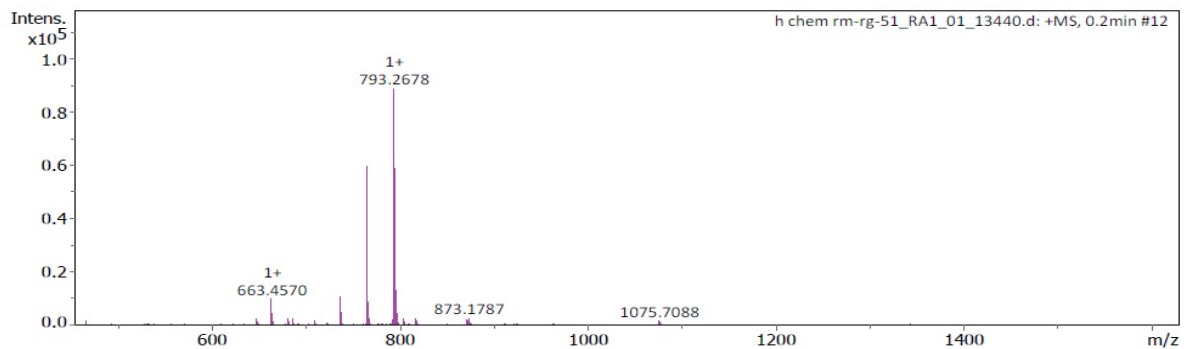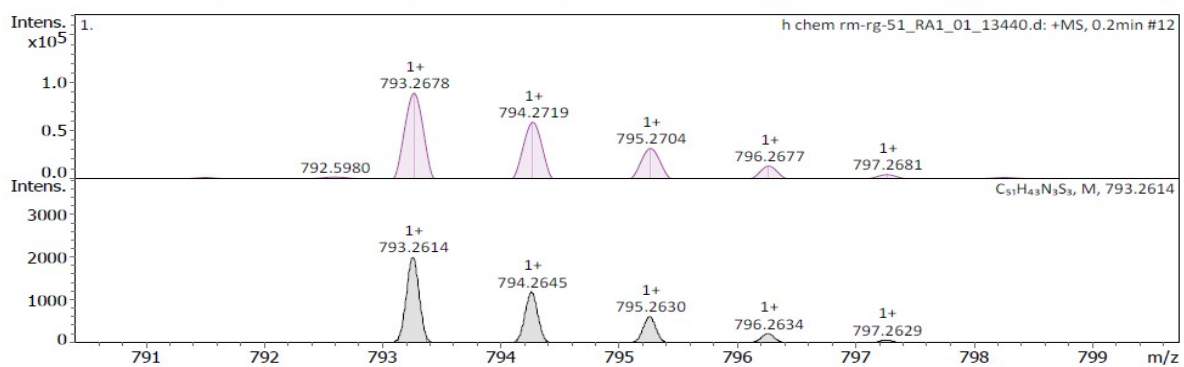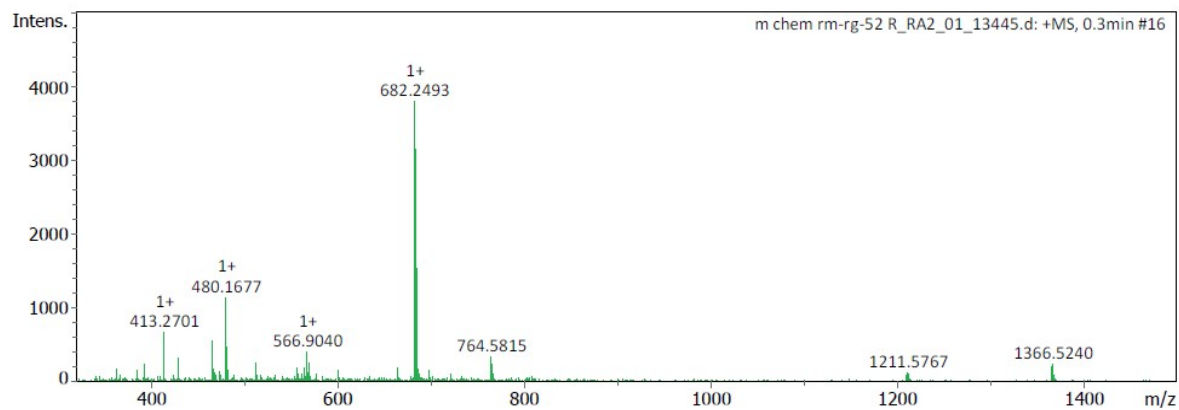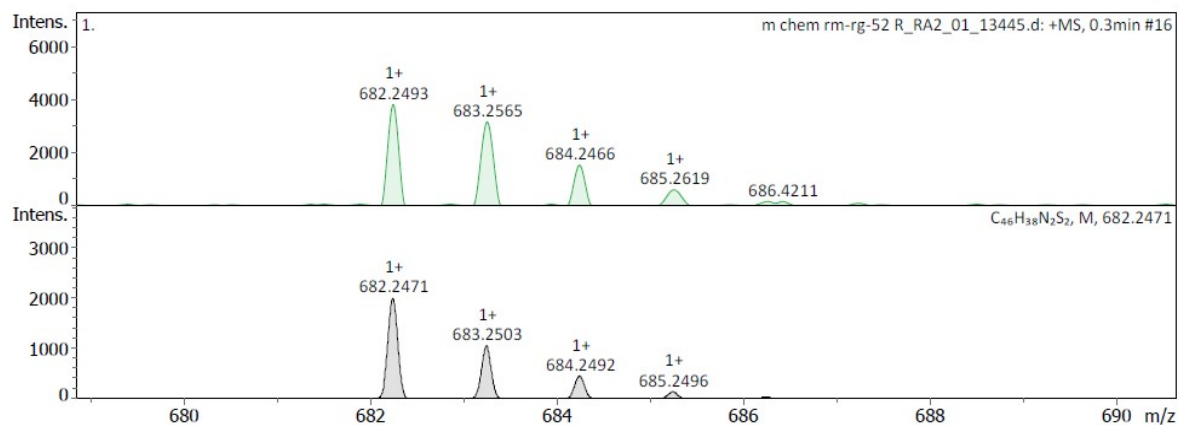

# HRMS of An(TPE)<sub>2</sub>, and (PTZ)<sub>4</sub>,

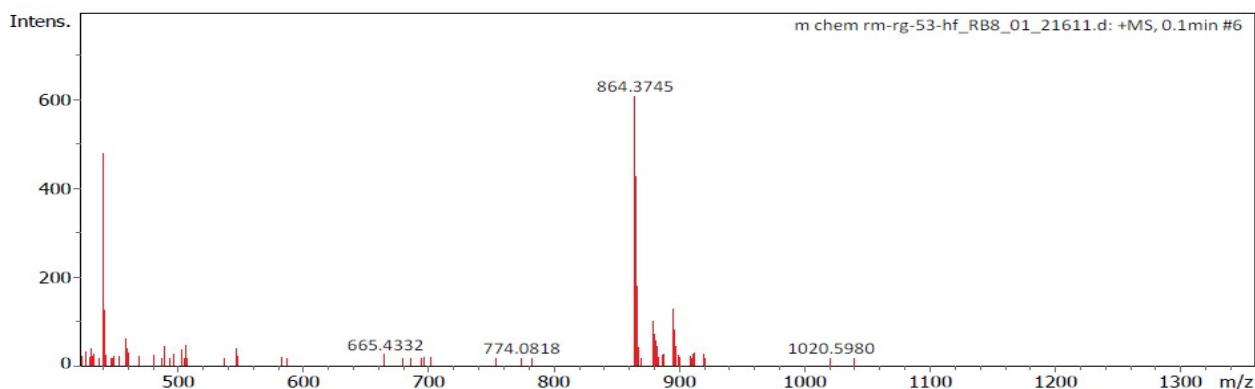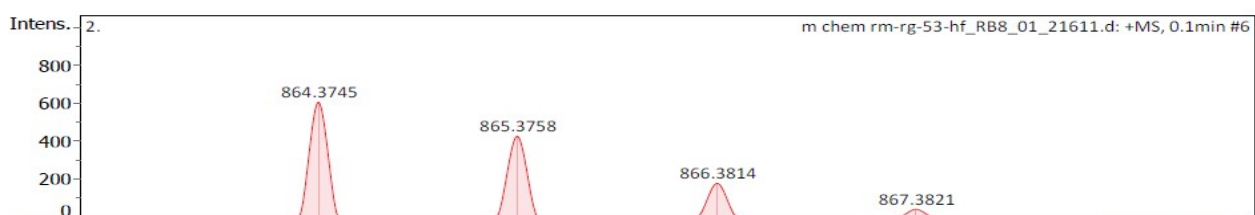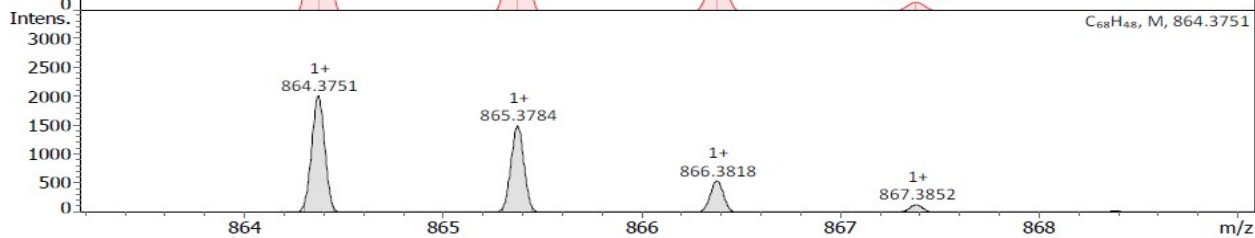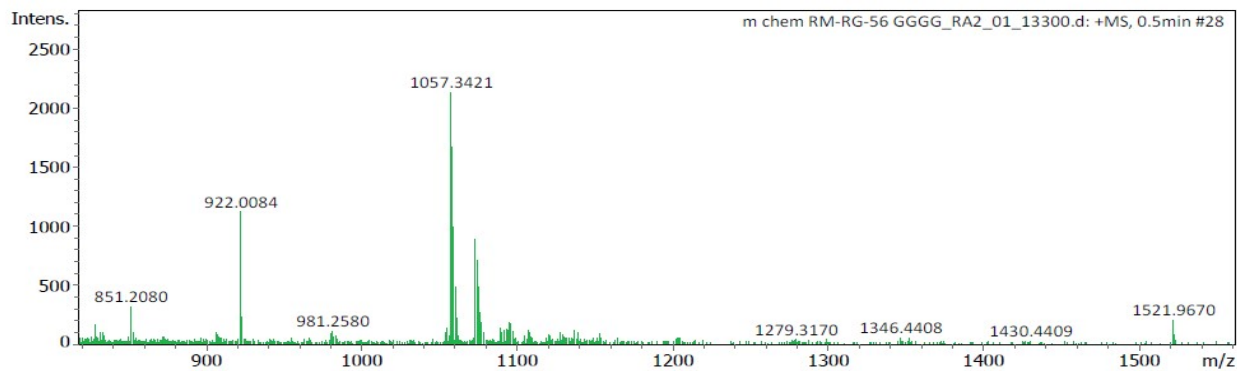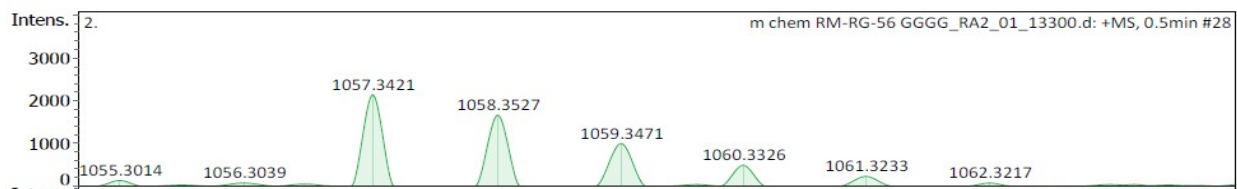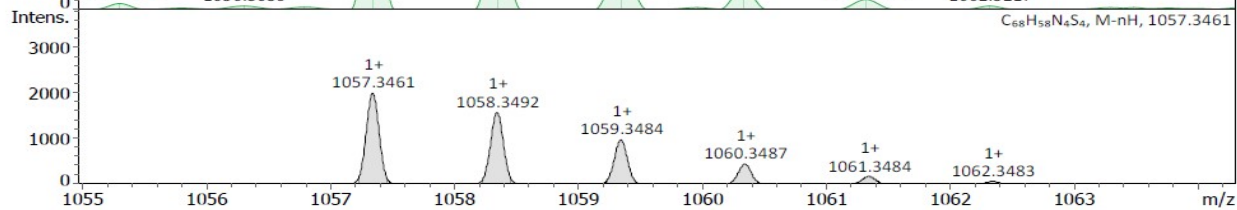

HRMS of (PTZ)<sub>5</sub> and PTZ-Ph-(PTZ)<sub>2</sub>.

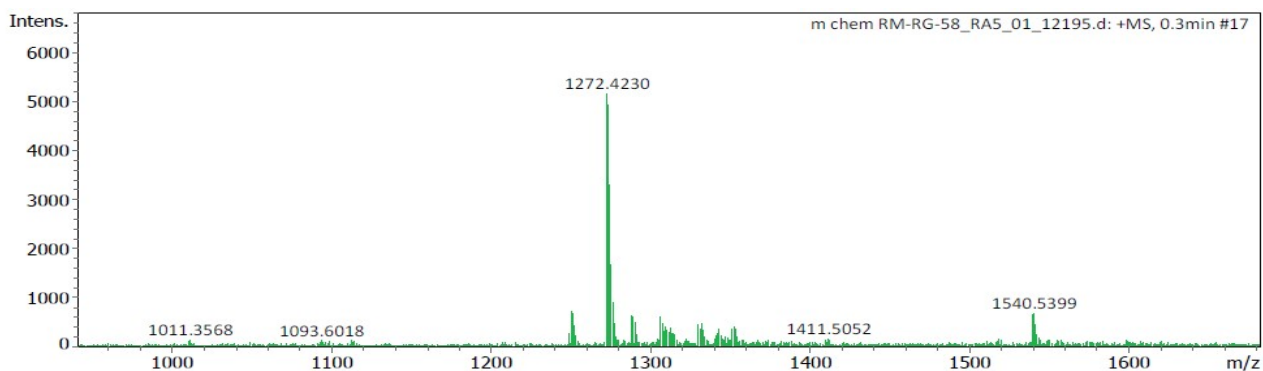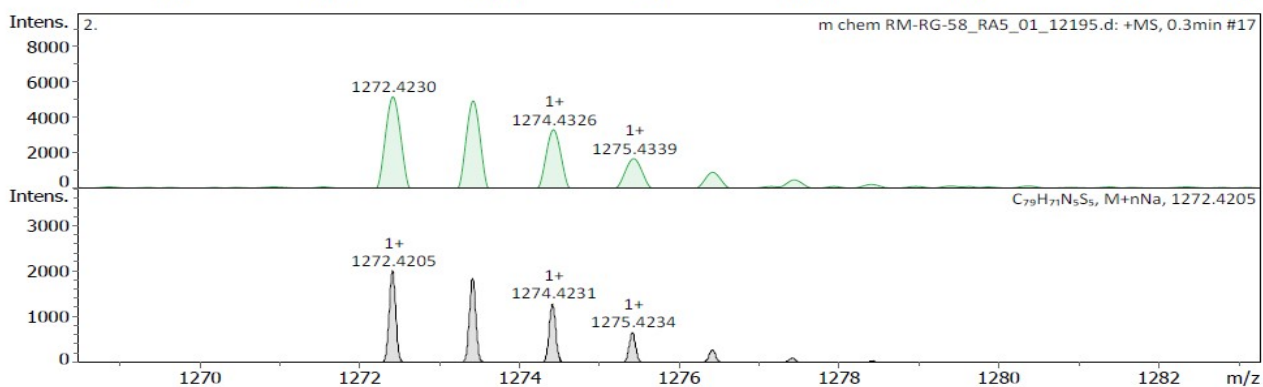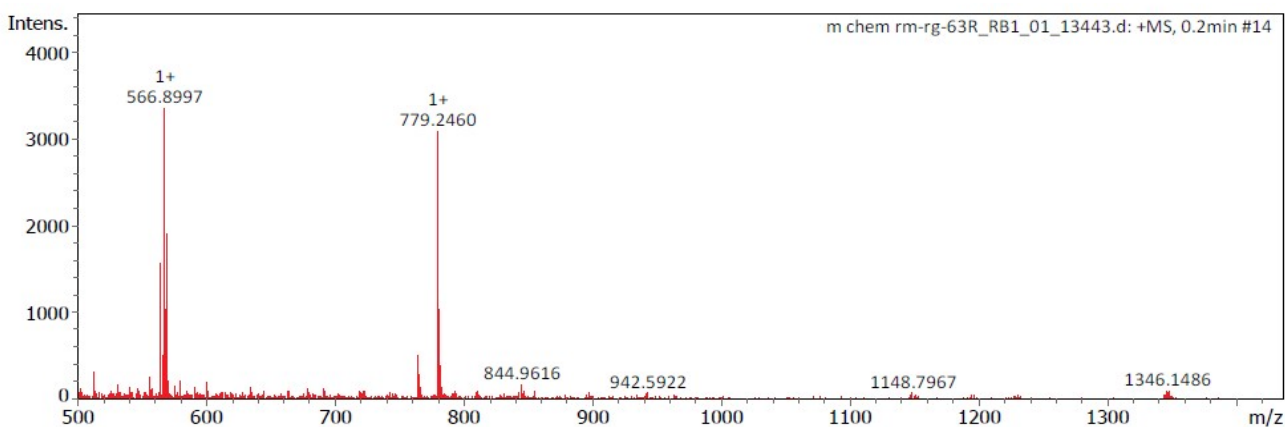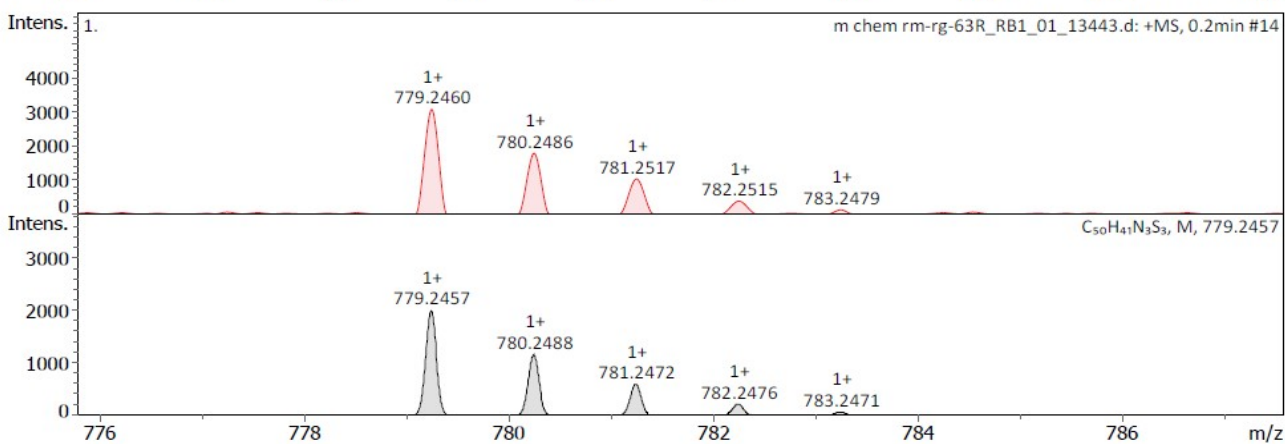

**DFT Calculation data of (PTZ)<sub>3</sub>, An(PTZ)<sub>2</sub>, An(TPE)<sub>2</sub>, (PTZ)<sub>4</sub>, (PTZ)<sub>5</sub> and PTZ-Ph-(PTZ)<sub>2</sub>**

Calculation method: B3LYP/6-31G (d,p) with Gaussian 09

**1. (PTZ)<sub>3</sub>,**

Standard orientation:

-----

| Center | Atomic | Atomic | Coordinates (Angstroms) |           |           |
|--------|--------|--------|-------------------------|-----------|-----------|
| Number | Number | Type   | X                       | Y         | Z         |
| 1      | 6      | 0      | -7.151640               | -7.014231 | 1.877112  |
| 2      | 6      | 0      | -6.894841               | -5.910693 | 1.063862  |
| 3      | 6      | 0      | -5.665164               | -5.780152 | 0.403898  |
| 4      | 6      | 0      | -4.680783               | -6.761875 | 0.622361  |
| 5      | 6      | 0      | -4.928364               | -7.841697 | 1.468217  |
| 6      | 6      | 0      | -6.172596               | -7.983927 | 2.082537  |
| 7      | 6      | 0      | -2.967785               | -4.871099 | -0.226451 |
| 8      | 6      | 0      | -4.122129               | -4.078632 | -0.380554 |
| 9      | 6      | 0      | -3.956448               | -2.686544 | -0.456583 |
| 10     | 1      | 0      | -4.824702               | -2.048493 | -0.570928 |
| 11     | 6      | 0      | -2.698134               | -2.104404 | -0.392284 |
| 12     | 6      | 0      | -1.539607               | -2.888226 | -0.216270 |
| 13     | 6      | 0      | -1.714218               | -4.286336 | -0.127998 |
| 14     | 1      | 0      | -8.117078               | -7.100075 | 2.365691  |
| 15     | 1      | 0      | -7.652182               | -5.143776 | 0.950779  |
| 16     | 1      | 0      | -4.145667               | -8.576166 | 1.628867  |
| 17     | 1      | 0      | -6.367066               | -8.837837 | 2.722828  |
| 18     | 1      | 0      | -2.609471               | -1.030864 | -0.477507 |

-----

|    |    |   |           |           |           |
|----|----|---|-----------|-----------|-----------|
| 19 | 1  | 0 | -0.845945 | -4.924539 | 0.006133  |
| 20 | 7  | 0 | -5.385559 | -4.690682 | -0.451045 |
| 21 | 16 | 0 | -3.137818 | -6.644709 | -0.259532 |
| 22 | 6  | 0 | -6.479042 | -4.005604 | -1.141183 |
| 23 | 6  | 0 | -6.158502 | -3.737133 | -2.617502 |
| 24 | 6  | 0 | -5.829418 | -5.015253 | -3.389743 |
| 25 | 1  | 0 | -7.342852 | -4.670683 | -1.094784 |
| 26 | 1  | 0 | -6.765502 | -3.075784 | -0.628208 |
| 27 | 1  | 0 | -5.326398 | -3.031258 | -2.700161 |
| 28 | 1  | 0 | -7.032669 | -3.239415 | -3.054895 |
| 29 | 1  | 0 | -5.627549 | -4.795127 | -4.442006 |
| 30 | 1  | 0 | -4.949282 | -5.509122 | -2.969451 |
| 31 | 1  | 0 | -6.661381 | -5.727217 | -3.347727 |
| 32 | 6  | 0 | -0.187680 | -2.375357 | -0.129135 |
| 33 | 1  | 0 | 0.587825  | -3.136463 | -0.120649 |
| 34 | 6  | 0 | 0.273512  | -1.085129 | -0.042179 |
| 35 | 6  | 0 | 1.676375  | -0.843386 | 0.016988  |
| 36 | 6  | 0 | 2.869523  | -0.612808 | 0.069410  |
| 37 | 6  | 0 | 4.262365  | -0.347721 | 0.132740  |
| 38 | 6  | 0 | 4.743064  | 0.965564  | 0.285490  |
| 39 | 6  | 0 | 5.199171  | -1.395655 | 0.039325  |
| 40 | 6  | 0 | 6.106934  | 1.222382  | 0.342046  |
| 41 | 1  | 0 | 4.034863  | 1.784377  | 0.344824  |
| 42 | 6  | 0 | 6.560096  | -1.138337 | 0.136122  |
| 43 | 1  | 0 | 4.851780  | -2.414608 | -0.089486 |
| 44 | 6  | 0 | 7.041722  | 0.177582  | 0.283433  |
| 45 | 1  | 0 | 6.448976  | 2.246105  | 0.433406  |

|    |    |   |           |           |           |
|----|----|---|-----------|-----------|-----------|
| 46 | 16 | 0 | 7.728431  | -2.483228 | 0.163478  |
| 47 | 7  | 0 | 8.428530  | 0.406452  | 0.360760  |
| 48 | 6  | 0 | 9.049530  | -1.682989 | -0.724078 |
| 49 | 6  | 0 | 9.284225  | -0.313278 | -0.502140 |
| 50 | 6  | 0 | 8.922030  | 1.601707  | 1.045267  |
| 51 | 6  | 0 | 9.871658  | -2.417411 | -1.576778 |
| 52 | 6  | 0 | 10.359603 | 0.294673  | -1.164196 |
| 53 | 6  | 0 | 8.489468  | 1.651626  | 2.516317  |
| 54 | 1  | 0 | 10.011772 | 1.551738  | 1.011454  |
| 55 | 1  | 0 | 8.629446  | 2.523682  | 0.521082  |
| 56 | 6  | 0 | 10.965456 | -1.810497 | -2.194271 |
| 57 | 1  | 0 | 9.657898  | -3.468813 | -1.740257 |
| 58 | 6  | 0 | 11.203697 | -0.453924 | -1.984319 |
| 59 | 1  | 0 | 10.534248 | 1.357811  | -1.046588 |
| 60 | 6  | 0 | 8.946633  | 0.425386  | 3.307187  |
| 61 | 1  | 0 | 7.402005  | 1.751768  | 2.586325  |
| 62 | 1  | 0 | 8.913621  | 2.566152  | 2.948662  |
| 63 | 1  | 0 | 11.615170 | -2.391513 | -2.840222 |
| 64 | 1  | 0 | 12.038563 | 0.036566  | -2.474843 |
| 65 | 1  | 0 | 8.644618  | 0.501980  | 4.355770  |
| 66 | 1  | 0 | 8.514369  | -0.489700 | 2.893660  |
| 67 | 1  | 0 | 10.036977 | 0.320286  | 3.277505  |
| 68 | 6  | 0 | -0.547780 | 0.074528  | 0.018441  |
| 69 | 6  | 0 | -1.203197 | 1.097027  | 0.089985  |
| 70 | 6  | 0 | -2.016535 | 2.257254  | 0.170258  |
| 71 | 6  | 0 | -3.393166 | 2.152899  | 0.441043  |
| 72 | 6  | 0 | -1.468638 | 3.539293  | -0.028269 |

|    |    |   |           |          |           |
|----|----|---|-----------|----------|-----------|
| 73 | 6  | 0 | -4.194376 | 3.285590 | 0.503373  |
| 74 | 1  | 0 | -3.830032 | 1.172065 | 0.594078  |
| 75 | 6  | 0 | -2.265447 | 4.671632 | 0.074955  |
| 76 | 1  | 0 | -0.411646 | 3.641546 | -0.246614 |
| 77 | 6  | 0 | -3.647030 | 4.566707 | 0.333344  |
| 78 | 1  | 0 | -5.255678 | 3.173688 | 0.688803  |
| 79 | 16 | 0 | -1.537957 | 6.294320 | -0.031560 |
| 80 | 7  | 0 | -4.430522 | 5.732719 | 0.407732  |
| 81 | 6  | 0 | -2.881226 | 7.112851 | -0.867503 |
| 82 | 6  | 0 | -4.202103 | 6.764816 | -0.530158 |
| 83 | 6  | 0 | -5.670442 | 5.717082 | 1.184891  |
| 84 | 6  | 0 | -2.625093 | 8.120461 | -1.795717 |
| 85 | 6  | 0 | -5.252748 | 7.449859 | -1.155372 |
| 86 | 6  | 0 | -5.427446 | 5.387238 | 2.663241  |
| 87 | 1  | 0 | -6.088414 | 6.723274 | 1.123969  |
| 88 | 1  | 0 | -6.416840 | 5.036089 | 0.749702  |
| 89 | 6  | 0 | -3.679267 | 8.825549 | -2.376574 |
| 90 | 1  | 0 | -1.596373 | 8.357664 | -2.047283 |
| 91 | 6  | 0 | -4.990898 | 8.485054 | -2.052751 |
| 92 | 1  | 0 | -6.278883 | 7.169411 | -0.948199 |
| 93 | 6  | 0 | -4.464456 | 6.367187 | 3.334544  |
| 94 | 1  | 0 | -5.045922 | 4.366530 | 2.764186  |
| 95 | 1  | 0 | -6.402900 | 5.405059 | 3.164513  |
| 96 | 1  | 0 | -3.474437 | 9.623585 | -3.082319 |
| 97 | 1  | 0 | -5.821427 | 9.010961 | -2.512902 |
| 98 | 1  | 0 | -4.331554 | 6.122089 | 4.392238  |
| 99 | 1  | 0 | -3.483352 | 6.342844 | 2.852830  |

100 1 0 -4.839756 7.394749 3.271158

-----  
Rotational constants (GHZ): 0.0278786 0.0183732 0.0118181

## 2. An(PTZ)<sub>2</sub>,

Standard orientation:

-----

| Center | Atomic | Atomic | Coordinates (Angstroms) |           |           |
|--------|--------|--------|-------------------------|-----------|-----------|
| Number | Number | Type   | X                       | Y         | Z         |
| 1      | 6      | 0      | -4.675357               | -1.101258 | 2.886927  |
| 2      | 6      | 0      | -5.104143               | -2.046600 | 1.995908  |
| 3      | 6      | 0      | -4.177951               | -2.750842 | 1.165477  |
| 4      | 6      | 0      | -2.771548               | -2.439235 | 1.258691  |
| 5      | 6      | 0      | -2.368863               | -1.474037 | 2.232788  |
| 6      | 6      | 0      | -3.285758               | -0.820513 | 3.011526  |
| 7      | 6      | 0      | -4.610905               | -3.734681 | 0.272806  |
| 8      | 6      | 0      | -1.852113               | -3.086364 | 0.395989  |
| 9      | 6      | 0      | -2.310802               | -4.085296 | -0.497791 |
| 10     | 6      | 0      | -3.712280               | -4.422874 | -0.546103 |
| 11     | 6      | 0      | -4.152736               | -5.433700 | -1.454215 |
| 12     | 1      | 0      | -5.210258               | -5.682456 | -1.472538 |
| 13     | 6      | 0      | -3.271114               | -6.070291 | -2.285267 |
| 14     | 6      | 0      | -1.892598               | -5.718554 | -2.263502 |
| 15     | 6      | 0      | -1.431747               | -4.754577 | -1.405047 |
| 16     | 1      | 0      | -5.670641               | -3.969968 | 0.214569  |

|    |    |   |           |           |           |
|----|----|---|-----------|-----------|-----------|
| 17 | 1  | 0 | -5.387723 | -0.573121 | 3.512592  |
| 18 | 1  | 0 | -6.159904 | -2.286526 | 1.905461  |
| 19 | 1  | 0 | -1.314061 | -1.265147 | 2.348673  |
| 20 | 1  | 0 | -2.952405 | -0.085604 | 3.737421  |
| 21 | 1  | 0 | -3.619508 | -6.836348 | -2.971062 |
| 22 | 1  | 0 | -1.203659 | -6.214558 | -2.940313 |
| 23 | 1  | 0 | -0.383650 | -4.478139 | -1.416592 |
| 24 | 6  | 0 | -0.416025 | -2.738766 | 0.393970  |
| 25 | 6  | 0 | 0.113862  | -1.510645 | 0.170604  |
| 26 | 1  | 0 | 0.276524  | -3.563985 | 0.545627  |
| 27 | 6  | 0 | 1.570188  | -1.281441 | 0.290514  |
| 28 | 6  | 0 | 2.355282  | -1.990160 | 1.212333  |
| 29 | 6  | 0 | 2.214909  | -0.343759 | -0.533202 |
| 30 | 6  | 0 | 3.729677  | -1.794128 | 1.293328  |
| 31 | 1  | 0 | 1.875916  | -2.677225 | 1.901608  |
| 32 | 6  | 0 | 3.593455  | -0.173973 | -0.483454 |
| 33 | 1  | 0 | 1.634299  | 0.236479  | -1.241833 |
| 34 | 6  | 0 | 4.379625  | -0.897038 | 0.433415  |
| 35 | 1  | 0 | 4.300008  | -2.333288 | 2.040358  |
| 36 | 16 | 0 | 4.408751  | 0.903181  | -1.645146 |
| 37 | 7  | 0 | 5.772361  | -0.691889 | 0.473027  |
| 38 | 6  | 0 | 5.690461  | 1.508667  | -0.565987 |
| 39 | 6  | 0 | 6.267614  | 0.626128  | 0.366199  |
| 40 | 6  | 0 | 6.640224  | -1.757671 | 0.973506  |
| 41 | 6  | 0 | 6.153104  | 2.817701  | -0.687670 |
| 42 | 6  | 0 | 7.313374  | 1.097434  | 1.171542  |
| 43 | 6  | 0 | 6.501447  | -3.052898 | 0.162998  |

|    |    |   |           |           |           |
|----|----|---|-----------|-----------|-----------|
| 44 | 1  | 0 | 7.665723  | -1.398393 | 0.869797  |
| 45 | 1  | 0 | 6.477578  | -1.949906 | 2.044676  |
| 46 | 6  | 0 | 7.224571  | 3.260303  | 0.088447  |
| 47 | 1  | 0 | 5.678938  | 3.480467  | -1.404437 |
| 48 | 6  | 0 | 7.800303  | 2.395334  | 1.016429  |
| 49 | 1  | 0 | 7.743977  | 0.452561  | 1.928663  |
| 50 | 6  | 0 | 6.793587  | -2.852612 | -1.324504 |
| 51 | 1  | 0 | 5.497645  | -3.470040 | 0.289122  |
| 52 | 1  | 0 | 7.197211  | -3.782557 | 0.595094  |
| 53 | 1  | 0 | 7.595161  | 4.273514  | -0.025827 |
| 54 | 1  | 0 | 8.621152  | 2.732299  | 1.641639  |
| 55 | 1  | 0 | 6.705968  | -3.796606 | -1.870353 |
| 56 | 1  | 0 | 6.096001  | -2.136254 | -1.766493 |
| 57 | 1  | 0 | 7.807466  | -2.466992 | -1.479596 |
| 58 | 6  | 0 | -0.748802 | -0.359581 | -0.193178 |
| 59 | 6  | 0 | -1.762628 | -0.487057 | -1.150432 |
| 60 | 6  | 0 | -0.627705 | 0.861269  | 0.486690  |
| 61 | 6  | 0 | -2.668605 | 0.541948  | -1.373933 |
| 62 | 1  | 0 | -1.849436 | -1.407494 | -1.715366 |
| 63 | 6  | 0 | -1.559259 | 1.876381  | 0.298160  |
| 64 | 1  | 0 | 0.168245  | 0.997291  | 1.211573  |
| 65 | 6  | 0 | -2.611230 | 1.723832  | -0.622253 |
| 66 | 1  | 0 | -3.439349 | 0.418299  | -2.125092 |
| 67 | 16 | 0 | -1.512436 | 3.341879  | 1.308775  |
| 68 | 7  | 0 | -3.569520 | 2.744902  | -0.767297 |
| 69 | 6  | 0 | -2.133977 | 4.503102  | 0.108167  |
| 70 | 6  | 0 | -3.139553 | 4.087239  | -0.785294 |

|    |   |   |           |          |           |
|----|---|---|-----------|----------|-----------|
| 71 | 6 | 0 | -4.920889 | 2.393578 | -1.204084 |
| 72 | 6 | 0 | -1.677911 | 5.819989 | 0.103136  |
| 73 | 6 | 0 | -3.669058 | 5.028959 | -1.678112 |
| 74 | 6 | 0 | -5.595277 | 1.393367 | -0.254816 |
| 75 | 1 | 0 | -5.501251 | 3.318221 | -1.197759 |
| 76 | 1 | 0 | -4.932771 | 2.018440 | -2.238196 |
| 77 | 6 | 0 | -2.243037 | 6.757333 | -0.762081 |
| 78 | 1 | 0 | -0.890912 | 6.108525 | 0.792615  |
| 79 | 6 | 0 | -3.239341 | 6.355649 | -1.649357 |
| 80 | 1 | 0 | -4.412788 | 4.722697 | -2.404605 |
| 81 | 6 | 0 | -5.682071 | 1.913401 | 1.179991  |
| 82 | 1 | 0 | -5.063130 | 0.437128 | -0.264205 |
| 83 | 1 | 0 | -6.598816 | 1.195956 | -0.651761 |
| 84 | 1 | 0 | -1.899315 | 7.786243 | -0.746878 |
| 85 | 1 | 0 | -3.675014 | 7.069626 | -2.341291 |
| 86 | 1 | 0 | -6.207516 | 1.198805 | 1.818495  |
| 87 | 1 | 0 | -4.684259 | 2.068453 | 1.598744  |
| 88 | 1 | 0 | -6.216764 | 2.869178 | 1.223726  |

-----  
Rotational constants (GHZ): 0.0651621 0.0391239 0.0273535

### 3. An(TPE)<sub>2</sub>,

Standard orientation:

-----  
Center Atomic Atomic Coordinates (Angstroms)  
Number Number Type X Y Z

---

|    |   |   |           |           |           |
|----|---|---|-----------|-----------|-----------|
| 1  | 6 | 0 | 3.356798  | 3.503656  | 3.957314  |
| 2  | 6 | 0 | 3.755416  | 4.301478  | 2.919427  |
| 3  | 6 | 0 | 3.041786  | 4.314361  | 1.681202  |
| 4  | 6 | 0 | 1.869077  | 3.483027  | 1.538446  |
| 5  | 6 | 0 | 1.488981  | 2.668709  | 2.650482  |
| 6  | 6 | 0 | 2.209997  | 2.672103  | 3.814713  |
| 7  | 6 | 0 | 3.452421  | 5.120979  | 0.617884  |
| 8  | 6 | 0 | 1.129878  | 3.521675  | 0.332815  |
| 9  | 6 | 0 | 1.556962  | 4.350701  | -0.729299 |
| 10 | 6 | 0 | 2.744160  | 5.156017  | -0.586007 |
| 11 | 6 | 0 | 3.164973  | 5.969207  | -1.681802 |
| 12 | 1 | 0 | 4.060890  | 6.571872  | -1.560957 |
| 13 | 6 | 0 | 2.463692  | 5.988356  | -2.857373 |
| 14 | 6 | 0 | 1.297531  | 5.186175  | -3.006224 |
| 15 | 6 | 0 | 0.861082  | 4.393545  | -1.976920 |
| 16 | 1 | 0 | 4.340211  | 5.738039  | 0.731265  |
| 17 | 1 | 0 | 3.909606  | 3.502260  | 4.891683  |
| 18 | 1 | 0 | 4.628679  | 4.941044  | 3.015222  |
| 19 | 1 | 0 | 0.609254  | 2.045162  | 2.557827  |
| 20 | 1 | 0 | 1.900673  | 2.042746  | 4.643433  |
| 21 | 1 | 0 | 2.796555  | 6.609352  | -3.683257 |
| 22 | 1 | 0 | 0.755739  | 5.200608  | -3.946955 |
| 23 | 1 | 0 | -0.017021 | 3.768958  | -2.101203 |
| 24 | 6 | 0 | -0.278011 | 1.422699  | 0.146626  |
| 25 | 6 | 0 | -1.627303 | 0.809229  | 0.139222  |
| 26 | 6 | 0 | -1.881424 | -0.361352 | -0.594679 |

|    |   |   |            |           |           |
|----|---|---|------------|-----------|-----------|
| 27 | 6 | 0 | -2.691568  | 1.377505  | 0.859801  |
| 28 | 6 | 0 | -3.152318  | -0.921615 | -0.629215 |
| 29 | 1 | 0 | -1.072423  | -0.826083 | -1.147740 |
| 30 | 6 | 0 | -3.963068  | 0.821618  | 0.818447  |
| 31 | 1 | 0 | -2.506787  | 2.248115  | 1.480708  |
| 32 | 6 | 0 | -4.224041  | -0.330496 | 0.059325  |
| 33 | 1 | 0 | -3.326995  | -1.825930 | -1.202954 |
| 34 | 1 | 0 | -4.768301  | 1.274311  | 1.385906  |
| 35 | 6 | 0 | -5.576480  | -0.945052 | 0.021859  |
| 36 | 6 | 0 | -6.710513  | -0.206465 | -0.153189 |
| 37 | 6 | 0 | -5.604109  | -2.424256 | 0.185107  |
| 38 | 6 | 0 | -8.071730  | -0.767283 | 0.060334  |
| 39 | 6 | 0 | -6.673117  | 1.220444  | -0.573865 |
| 40 | 6 | 0 | -4.836014  | -3.041373 | 1.185063  |
| 41 | 6 | 0 | -6.359671  | -3.236361 | -0.674939 |
| 42 | 6 | 0 | -9.096858  | -0.509369 | -0.863763 |
| 43 | 6 | 0 | -8.376027  | -1.527351 | 1.200731  |
| 44 | 6 | 0 | -7.470762  | 2.173709  | 0.078725  |
| 45 | 6 | 0 | -5.874557  | 1.640242  | -1.649276 |
| 46 | 6 | 0 | -4.850482  | -4.425300 | 1.343235  |
| 47 | 1 | 0 | -4.231067  | -2.424509 | 1.841858  |
| 48 | 6 | 0 | -6.366813  | -4.620091 | -0.523439 |
| 49 | 1 | 0 | -6.945906  | -2.771207 | -1.459568 |
| 50 | 6 | 0 | -10.376496 | -1.025446 | -0.672420 |
| 51 | 1 | 0 | -8.879594  | 0.095247  | -1.738441 |
| 52 | 6 | 0 | -9.657089  | -2.034962 | 1.397142  |
| 53 | 1 | 0 | -7.596888  | -1.720637 | 1.929482  |

|    |   |   |            |           |           |
|----|---|---|------------|-----------|-----------|
| 54 | 6 | 0 | -7.441491  | 3.512064  | -0.306649 |
| 55 | 1 | 0 | -8.109260  | 1.856681  | 0.897087  |
| 56 | 6 | 0 | -5.852669  | 2.975743  | -2.041215 |
| 57 | 1 | 0 | -5.266740  | 0.909730  | -2.171427 |
| 58 | 6 | 0 | -5.617298  | -5.220252 | 0.490110  |
| 59 | 1 | 0 | -4.259793  | -4.883691 | 2.130728  |
| 60 | 1 | 0 | -6.955847  | -5.231806 | -1.200111 |
| 61 | 6 | 0 | -10.661652 | -1.791723 | 0.458537  |
| 62 | 1 | 0 | -11.152530 | -0.826101 | -1.405388 |
| 63 | 1 | 0 | -9.872981  | -2.618599 | 2.286983  |
| 64 | 6 | 0 | -6.630542  | 3.918978  | -1.367182 |
| 65 | 1 | 0 | -8.054508  | 4.237520  | 0.219749  |
| 66 | 1 | 0 | -5.229958  | 3.280500  | -2.876969 |
| 67 | 1 | 0 | -5.624760  | -6.299422 | 0.608953  |
| 68 | 1 | 0 | -11.660189 | -2.189604 | 0.611503  |
| 69 | 1 | 0 | -6.610987  | 4.961023  | -1.671351 |
| 70 | 6 | 0 | 0.892879   | 0.513213  | 0.068743  |
| 71 | 6 | 0 | 0.980327   | -0.620779 | 0.890118  |
| 72 | 6 | 0 | 1.924131   | 0.748854  | -0.852682 |
| 73 | 6 | 0 | 2.076469   | -1.472608 | 0.814102  |
| 74 | 1 | 0 | 0.180788   | -0.830275 | 1.593755  |
| 75 | 6 | 0 | 3.015451   | -0.104785 | -0.931040 |
| 76 | 1 | 0 | 1.856670   | 1.599136  | -1.521329 |
| 77 | 6 | 0 | 3.124856   | -1.219745 | -0.084865 |
| 78 | 1 | 0 | 2.131136   | -2.342576 | 1.460388  |
| 79 | 1 | 0 | 3.800437   | 0.092171  | -1.651817 |
| 80 | 6 | 0 | 4.298443   | -2.129608 | -0.159626 |

|     |   |   |          |           |           |
|-----|---|---|----------|-----------|-----------|
| 81  | 6 | 0 | 5.575728 | -1.653485 | -0.230410 |
| 82  | 6 | 0 | 3.980387 | -3.582628 | -0.145809 |
| 83  | 6 | 0 | 6.741031 | -2.512987 | -0.566448 |
| 84  | 6 | 0 | 5.888498 | -0.220456 | 0.020887  |
| 85  | 6 | 0 | 2.933632 | -4.087051 | -0.934076 |
| 86  | 6 | 0 | 4.683272 | -4.473780 | 0.680380  |
| 87  | 6 | 0 | 7.941409 | -2.388740 | 0.151406  |
| 88  | 6 | 0 | 6.689769 | -3.430221 | -1.628421 |
| 89  | 6 | 0 | 6.709363 | 0.497370  | -0.862554 |
| 90  | 6 | 0 | 5.374163 | 0.441494  | 1.146070  |
| 91  | 6 | 0 | 2.621557 | -5.444612 | -0.922705 |
| 92  | 1 | 0 | 2.369244 | -3.404343 | -1.561111 |
| 93  | 6 | 0 | 4.366799 | -5.829185 | 0.697894  |
| 94  | 1 | 0 | 5.483384 | -4.093484 | 1.305432  |
| 95  | 6 | 0 | 9.043770 | -3.181952 | -0.158603 |
| 96  | 1 | 0 | 7.999982 | -1.666553 | 0.959235  |
| 97  | 6 | 0 | 7.794157 | -4.216056 | -1.944445 |
| 98  | 1 | 0 | 5.774362 | -3.523133 | -2.201827 |
| 99  | 6 | 0 | 6.962599 | 1.851959  | -0.654846 |
| 100 | 1 | 0 | 7.131581 | -0.011380 | -1.723417 |
| 101 | 6 | 0 | 5.636554 | 1.790139  | 1.361374  |
| 102 | 1 | 0 | 4.748297 | -0.106339 | 1.841665  |
| 103 | 6 | 0 | 3.338269 | -6.321835 | -0.107605 |
| 104 | 1 | 0 | 1.816244 | -5.817427 | -1.548608 |
| 105 | 1 | 0 | 4.921076 | -6.501979 | 1.345378  |
| 106 | 6 | 0 | 8.974166 | -4.100399 | -1.207034 |
| 107 | 1 | 0 | 9.959153 | -3.080174 | 0.416711  |

|     |   |   |           |           |           |
|-----|---|---|-----------|-----------|-----------|
| 108 | 1 | 0 | 7.735469  | -4.917353 | -2.771418 |
| 109 | 6 | 0 | 6.420930  | 2.503957  | 0.453954  |
| 110 | 1 | 0 | 7.580599  | 2.398567  | -1.361050 |
| 111 | 1 | 0 | 5.219247  | 2.285491  | 2.229810  |
| 112 | 1 | 0 | 3.092478  | -7.379313 | -0.094073 |
| 113 | 1 | 0 | 9.834700  | -4.714985 | -1.453276 |
| 114 | 1 | 0 | 6.610215  | 3.561203  | 0.613254  |
| 115 | 6 | 0 | -0.136771 | 2.766309  | 0.193094  |
| 116 | 1 | 0 | -1.039066 | 3.372045  | 0.120562  |

-----  
Rotational constants (GHZ): 0.0479464 0.0187044 0.0146920

#### 4. (PTZ)<sub>4</sub>,

Standard orientation:

-----

| Center<br>Number | Atomic<br>Number | Atomic<br>Type | Coordinates (Angstroms) |          |           |
|------------------|------------------|----------------|-------------------------|----------|-----------|
|                  |                  |                | X                       | Y        | Z         |
| 1                | 6                | 0              | -8.271396               | 8.005230 | -1.584423 |
| 2                | 6                | 0              | -8.020719               | 6.724290 | -1.092888 |
| 3                | 6                | 0              | -6.917901               | 6.480481 | -0.262743 |
| 4                | 6                | 0              | -6.044661               | 7.547613 | 0.019378  |
| 5                | 6                | 0              | -6.277866               | 8.816764 | -0.507309 |
| 6                | 6                | 0              | -7.404378               | 9.056412 | -1.294172 |
| 7                | 6                | 0              | -4.275732               | 5.610926 | 0.612156  |
| 8                | 6                | 0              | -5.327709               | 4.732409 | 0.288092  |

|    |    |   |           |           |           |
|----|----|---|-----------|-----------|-----------|
| 9  | 6  | 0 | -4.999037 | 3.404293  | -0.026267 |
| 10 | 1  | 0 | -5.782113 | 2.709415  | -0.305173 |
| 11 | 6  | 0 | -3.685475 | 2.957847  | 0.006895  |
| 12 | 6  | 0 | -2.624984 | 3.832048  | 0.321510  |
| 13 | 6  | 0 | -2.959292 | 5.174732  | 0.602217  |
| 14 | 1  | 0 | -9.140218 | 8.171039  | -2.213578 |
| 15 | 1  | 0 | -8.681644 | 5.910053  | -1.365711 |
| 16 | 1  | 0 | -5.579570 | 9.616956  | -0.283765 |
| 17 | 1  | 0 | -7.592637 | 10.051179 | -1.683986 |
| 18 | 1  | 0 | -3.473150 | 1.926551  | -0.235964 |
| 19 | 1  | 0 | -2.170357 | 5.882490  | 0.839121  |
| 20 | 7  | 0 | -6.653149 | 5.202428  | 0.277862  |
| 21 | 16 | 0 | -4.674891 | 7.270632  | 1.124099  |
| 22 | 6  | 0 | -7.751103 | 4.256401  | 0.480892  |
| 23 | 6  | 0 | -7.660657 | 3.540273  | 1.834621  |
| 24 | 6  | 0 | -7.648449 | 4.512749  | 3.014554  |
| 25 | 1  | 0 | -8.673006 | 4.840109  | 0.465391  |
| 26 | 1  | 0 | -7.820123 | 3.529281  | -0.341433 |
| 27 | 1  | 0 | -6.768512 | 2.907486  | 1.867333  |
| 28 | 1  | 0 | -8.522635 | 2.865380  | 1.903215  |
| 29 | 1  | 0 | -7.605527 | 3.973863  | 3.965560  |
| 30 | 1  | 0 | -6.784405 | 5.180612  | 2.961190  |
| 31 | 1  | 0 | -8.549501 | 5.136393  | 3.020976  |
| 32 | 6  | 0 | -1.224452 | 3.463408  | 0.372613  |
| 33 | 1  | 0 | -0.555935 | 4.294656  | 0.588238  |
| 34 | 6  | 0 | -0.603935 | 2.250735  | 0.214450  |
| 35 | 6  | 0 | 1.140972  | -0.116824 | 1.209907  |

|    |    |   |           |           |           |
|----|----|---|-----------|-----------|-----------|
| 36 | 6  | 0 | 0.294070  | -0.056174 | 2.321140  |
| 37 | 6  | 0 | 1.520539  | -1.377966 | 0.734115  |
| 38 | 6  | 0 | -0.180147 | -1.212661 | 2.927343  |
| 39 | 1  | 0 | 0.013900  | 0.911741  | 2.721022  |
| 40 | 6  | 0 | 0.991911  | -2.536866 | 1.294952  |
| 41 | 1  | 0 | 2.202088  | -1.452206 | -0.107261 |
| 42 | 6  | 0 | 0.137059  | -2.477699 | 2.411361  |
| 43 | 1  | 0 | -0.808734 | -1.125283 | 3.803961  |
| 44 | 16 | 0 | 1.292192  | -4.113753 | 0.526334  |
| 45 | 7  | 0 | -0.366768 | -3.665781 | 2.980200  |
| 46 | 6  | 0 | 1.333244  | -5.114640 | 1.996628  |
| 47 | 6  | 0 | 0.476500  | -4.795942 | 3.068542  |
| 48 | 6  | 0 | -1.550295 | -3.578591 | 3.839255  |
| 49 | 6  | 0 | 2.167197  | -6.229926 | 2.054116  |
| 50 | 6  | 0 | 0.505995  | -5.622478 | 4.201859  |
| 51 | 6  | 0 | -2.793060 | -3.091545 | 3.084380  |
| 52 | 1  | 0 | -1.757988 | -4.587129 | 4.197617  |
| 53 | 1  | 0 | -1.355343 | -2.960419 | 4.727521  |
| 54 | 6  | 0 | 2.144663  | -7.072046 | 3.165332  |
| 55 | 1  | 0 | 2.824342  | -6.438816 | 1.215843  |
| 56 | 6  | 0 | 1.313779  | -6.758729 | 4.238279  |
| 57 | 1  | 0 | -0.095945 | -5.375854 | 5.067744  |
| 58 | 6  | 0 | -3.202078 | -4.056449 | 1.975002  |
| 59 | 1  | 0 | -2.625391 | -2.094942 | 2.665499  |
| 60 | 1  | 0 | -3.600158 | -2.991047 | 3.820795  |
| 61 | 1  | 0 | 2.779612  | -7.951192 | 3.195045  |
| 62 | 1  | 0 | 1.302527  | -7.387442 | 5.123058  |

|    |    |   |           |           |           |
|----|----|---|-----------|-----------|-----------|
| 63 | 1  | 0 | -4.130657 | -3.743012 | 1.494232  |
| 64 | 1  | 0 | -2.430301 | -4.111565 | 1.204337  |
| 65 | 1  | 0 | -3.355946 | -5.065663 | 2.371209  |
| 66 | 6  | 0 | -1.274942 | 1.041752  | -0.115633 |
| 67 | 6  | 0 | -1.737651 | -0.029982 | -0.458590 |
| 68 | 6  | 0 | -2.157259 | -1.316073 | -0.886553 |
| 69 | 6  | 0 | -1.198593 | -2.228961 | -1.361987 |
| 70 | 6  | 0 | -3.506646 | -1.716175 | -0.867690 |
| 71 | 6  | 0 | -1.566776 | -3.496929 | -1.784410 |
| 72 | 1  | 0 | -0.160198 | -1.926555 | -1.398833 |
| 73 | 6  | 0 | -3.868090 | -2.997401 | -1.266596 |
| 74 | 1  | 0 | -4.268598 | -1.028080 | -0.518104 |
| 75 | 6  | 0 | -2.904345 | -3.915768 | -1.728470 |
| 76 | 1  | 0 | -0.800229 | -4.169860 | -2.144528 |
| 77 | 16 | 0 | -5.553623 | -3.545105 | -1.092825 |
| 78 | 7  | 0 | -3.298116 | -5.211815 | -2.116752 |
| 79 | 6  | 0 | -5.622017 | -4.602290 | -2.524220 |
| 80 | 6  | 0 | -4.484389 | -5.354967 | -2.872499 |
| 81 | 6  | 0 | -2.291233 | -6.276898 | -2.139683 |
| 82 | 6  | 0 | -6.804973 | -4.717715 | -3.251951 |
| 83 | 6  | 0 | -4.570185 | -6.211666 | -3.979055 |
| 84 | 6  | 0 | -1.702081 | -6.559387 | -0.751629 |
| 85 | 1  | 0 | -2.797151 | -7.180560 | -2.482768 |
| 86 | 1  | 0 | -1.496224 | -6.062607 | -2.868520 |
| 87 | 6  | 0 | -6.890484 | -5.610581 | -4.319972 |
| 88 | 1  | 0 | -7.660320 | -4.113409 | -2.967113 |
| 89 | 6  | 0 | -5.768013 | -6.352913 | -4.679479 |

|     |    |   |           |           |           |
|-----|----|---|-----------|-----------|-----------|
| 90  | 1  | 0 | -3.697576 | -6.765123 | -4.304200 |
| 91  | 6  | 0 | -2.744945 | -7.110645 | 0.220497  |
| 92  | 1  | 0 | -1.242731 | -5.656667 | -0.338768 |
| 93  | 1  | 0 | -0.887564 | -7.282475 | -0.882321 |
| 94  | 1  | 0 | -7.820028 | -5.712600 | -4.869927 |
| 95  | 1  | 0 | -5.810822 | -7.034617 | -5.523064 |
| 96  | 1  | 0 | -2.313912 | -7.253019 | 1.215584  |
| 97  | 1  | 0 | -3.590398 | -6.424089 | 0.311469  |
| 98  | 1  | 0 | -3.132661 | -8.076689 | -0.122544 |
| 99  | 6  | 0 | 3.053481  | 1.205215  | 0.391839  |
| 100 | 6  | 0 | 4.259284  | 1.193255  | 0.220932  |
| 101 | 6  | 0 | 5.663391  | 1.182288  | 0.020230  |
| 102 | 6  | 0 | 6.453034  | 0.123594  | 0.505721  |
| 103 | 6  | 0 | 6.302968  | 2.231770  | -0.668820 |
| 104 | 6  | 0 | 7.827940  | 0.113120  | 0.309943  |
| 105 | 1  | 0 | 5.976939  | -0.683562 | 1.051183  |
| 106 | 6  | 0 | 7.672477  | 2.198589  | -0.894375 |
| 107 | 1  | 0 | 5.715243  | 3.062291  | -1.043459 |
| 108 | 6  | 0 | 8.463426  | 1.139885  | -0.405169 |
| 109 | 1  | 0 | 8.413901  | -0.701712 | 0.717549  |
| 110 | 16 | 0 | 8.449240  | 3.455704  | -1.890230 |
| 111 | 7  | 0 | 9.851282  | 1.143229  | -0.638917 |
| 112 | 6  | 0 | 9.997648  | 3.544637  | -1.014140 |
| 113 | 6  | 0 | 10.558564 | 2.358643  | -0.505132 |
| 114 | 6  | 0 | 10.581345 | -0.124769 | -0.648503 |
| 115 | 6  | 0 | 10.668384 | 4.760001  | -0.889208 |
| 116 | 6  | 0 | 11.802770 | 2.430619  | 0.135905  |

|     |   |   |           |           |           |
|-----|---|---|-----------|-----------|-----------|
| 117 | 6 | 0 | 10.057287 | -1.093626 | -1.716449 |
| 118 | 1 | 0 | 11.618752 | 0.116316  | -0.886932 |
| 119 | 1 | 0 | 10.585317 | -0.602232 | 0.342718  |
| 120 | 6 | 0 | 11.926596 | 4.810441  | -0.288865 |
| 121 | 1 | 0 | 10.205413 | 5.661049  | -1.278626 |
| 122 | 6 | 0 | 12.488121 | 3.642389  | 0.222357  |
| 123 | 1 | 0 | 12.234787 | 1.540099  | 0.577319  |
| 124 | 6 | 0 | 10.100108 | -0.499044 | -3.124594 |
| 125 | 1 | 0 | 9.035324  | -1.403306 | -1.477516 |
| 126 | 1 | 0 | 10.675503 | -1.998213 | -1.664060 |
| 127 | 1 | 0 | 12.454083 | 5.755429  | -0.213305 |
| 128 | 1 | 0 | 13.456999 | 3.670256  | 0.710885  |
| 129 | 1 | 0 | 9.750143  | -1.223848 | -3.865396 |
| 130 | 1 | 0 | 9.468277  | 0.390448  | -3.192558 |
| 131 | 1 | 0 | 11.119297 | -0.203325 | -3.397603 |
| 132 | 6 | 0 | 1.650999  | 1.135732  | 0.592301  |
| 133 | 6 | 0 | 0.861992  | 2.203193  | 0.275742  |
| 134 | 1 | 0 | 1.367548  | 3.123529  | -0.004890 |

-----  
Rotational constants (GHZ): 0.0205247 0.0125857 0.0088272

## 5. (PTZ)<sub>5</sub>

Standard orientation:

-----  
Center Atomic Atomic Coordinates (Angstroms)  
Number Number Type X Y Z

---

|    |    |   |           |           |          |
|----|----|---|-----------|-----------|----------|
| 1  | 6  | 0 | 3.129723  | 0.233912  | 3.014496 |
| 2  | 6  | 0 | 1.960987  | 0.732153  | 3.574797 |
| 3  | 6  | 0 | 0.869577  | -0.109629 | 3.837621 |
| 4  | 6  | 0 | 0.991409  | -1.471731 | 3.506170 |
| 5  | 6  | 0 | 2.149693  | -1.957253 | 2.909684 |
| 6  | 6  | 0 | 3.243703  | -1.116114 | 2.641595 |
| 7  | 6  | 0 | -1.691023 | -1.470135 | 3.540895 |
| 8  | 6  | 0 | -1.547666 | -0.107507 | 3.859336 |
| 9  | 6  | 0 | -2.629737 | 0.746760  | 3.604389 |
| 10 | 1  | 0 | -2.551603 | 1.802537  | 3.830371 |
| 11 | 6  | 0 | -3.804672 | 0.258559  | 3.050388 |
| 12 | 6  | 0 | -3.941876 | -1.093152 | 2.692951 |
| 13 | 6  | 0 | -2.863533 | -1.949794 | 2.962259 |
| 14 | 1  | 0 | 3.957808  | 0.909325  | 2.841288 |
| 15 | 1  | 0 | 1.895417  | 1.790588  | 3.796078 |
| 16 | 1  | 0 | 2.203769  | -3.008470 | 2.642555 |
| 17 | 1  | 0 | -4.622126 | 0.943662  | 2.863306 |
| 18 | 1  | 0 | -2.929090 | -3.000471 | 2.695927 |
| 19 | 7  | 0 | -0.332602 | 0.359623  | 4.404011 |
| 20 | 16 | 0 | -0.345758 | -2.575235 | 3.926054 |
| 21 | 6  | 0 | -0.330345 | 1.595003  | 5.186201 |
| 22 | 6  | 0 | -1.227302 | 1.502894  | 6.427222 |
| 23 | 6  | 0 | -0.832855 | 0.351688  | 7.353229 |
| 24 | 1  | 0 | 0.696145  | 1.749782  | 5.522766 |
| 25 | 1  | 0 | -0.598763 | 2.467023  | 4.571093 |
| 26 | 1  | 0 | -2.274816 | 1.394641  | 6.130345 |

|    |    |   |            |           |           |
|----|----|---|------------|-----------|-----------|
| 27 | 1  | 0 | -1.151306  | 2.461745  | 6.954605  |
| 28 | 1  | 0 | -1.476742  | 0.321171  | 8.237201  |
| 29 | 1  | 0 | -0.914659  | -0.608163 | 6.836512  |
| 30 | 1  | 0 | 0.203166   | 0.457005  | 7.694387  |
| 31 | 6  | 0 | -5.154053  | -1.600128 | 2.028754  |
| 32 | 1  | 0 | -5.512938  | -2.573593 | 2.357241  |
| 33 | 6  | 0 | -5.828271  | -0.965188 | 1.036628  |
| 34 | 6  | 0 | 4.436138   | -1.685918 | 2.007080  |
| 35 | 1  | 0 | 4.606573   | -2.737578 | 2.228438  |
| 36 | 6  | 0 | 5.321987   | -1.089315 | 1.168515  |
| 37 | 6  | 0 | -7.117323  | -1.463009 | 0.518047  |
| 38 | 6  | 0 | -8.001486  | -2.208512 | 1.313576  |
| 39 | 6  | 0 | -7.495966  | -1.204257 | -0.810416 |
| 40 | 6  | 0 | -9.196582  | -2.701147 | 0.801008  |
| 41 | 1  | 0 | -7.755657  | -2.396205 | 2.353104  |
| 42 | 6  | 0 | -8.708887  | -1.659371 | -1.313832 |
| 43 | 1  | 0 | -6.835116  | -0.634348 | -1.454022 |
| 44 | 6  | 0 | -9.581082  | -2.426250 | -0.519191 |
| 45 | 1  | 0 | -9.844326  | -3.289450 | 1.439807  |
| 46 | 16 | 0 | -9.223423  | -1.215449 | -2.961134 |
| 47 | 7  | 0 | -10.798038 | -2.885528 | -1.062168 |
| 48 | 6  | 0 | -10.062579 | -2.731026 | -3.377125 |
| 49 | 6  | 0 | -10.799176 | -3.395745 | -2.378711 |
| 50 | 6  | 0 | -11.920888 | -3.168360 | -0.169205 |
| 51 | 6  | 0 | -10.036765 | -3.214858 | -4.683865 |
| 52 | 6  | 0 | -11.500099 | -4.557627 | -2.729607 |
| 53 | 6  | 0 | -12.359355 | -1.929417 | 0.622697  |

|    |    |   |            |           |           |
|----|----|---|------------|-----------|-----------|
| 54 | 1  | 0 | -12.752818 | -3.480357 | -0.803124 |
| 55 | 1  | 0 | -11.705195 | -4.007912 | 0.508499  |
| 56 | 6  | 0 | -10.774911 | -4.347060 | -5.029555 |
| 57 | 1  | 0 | -9.447918  | -2.690010 | -5.429309 |
| 58 | 6  | 0 | -11.504393 | -5.014080 | -4.047695 |
| 59 | 1  | 0 | -12.037054 | -5.113574 | -1.969833 |
| 60 | 6  | 0 | -12.748024 | -0.760727 | -0.283713 |
| 61 | 1  | 0 | -11.562798 | -1.618470 | 1.305686  |
| 62 | 1  | 0 | -13.208361 | -2.226820 | 1.250397  |
| 63 | 1  | 0 | -10.768628 | -4.707342 | -6.052868 |
| 64 | 1  | 0 | -12.066764 | -5.908245 | -4.297683 |
| 65 | 1  | 0 | -13.076105 | 0.100294  | 0.306058  |
| 66 | 1  | 0 | -11.902225 | -0.449794 | -0.902796 |
| 67 | 1  | 0 | -13.566493 | -1.039527 | -0.956923 |
| 68 | 6  | 0 | -5.239950  | 0.252714  | 0.414658  |
| 69 | 6  | 0 | -5.899234  | 1.486846  | 0.427913  |
| 70 | 6  | 0 | -3.940133  | 0.197234  | -0.105606 |
| 71 | 6  | 0 | -5.240465  | 2.648870  | 0.029995  |
| 72 | 1  | 0 | -6.921277  | 1.543203  | 0.789053  |
| 73 | 6  | 0 | -3.270565  | 1.354882  | -0.479869 |
| 74 | 1  | 0 | -3.423301  | -0.755008 | -0.146978 |
| 75 | 6  | 0 | -3.899893  | 2.608020  | -0.378361 |
| 76 | 1  | 0 | -5.759996  | 3.599739  | 0.066665  |
| 77 | 16 | 0 | -1.556222  | 1.280014  | -0.949592 |
| 78 | 7  | 0 | -3.171447  | 3.778248  | -0.670891 |
| 79 | 6  | 0 | -1.534057  | 2.657047  | -2.078789 |
| 80 | 6  | 0 | -2.308573  | 3.796168  | -1.784351 |

|     |   |   |           |           |           |
|-----|---|---|-----------|-----------|-----------|
| 81  | 6 | 0 | -3.468755 | 5.010513  | 0.057348  |
| 82  | 6 | 0 | -0.662037 | 2.654133  | -3.166433 |
| 83  | 6 | 0 | -2.177073 | 4.924598  | -2.604258 |
| 84  | 6 | 0 | -3.379171 | 4.827264  | 1.579596  |
| 85  | 1 | 0 | -2.716387 | 5.740648  | -0.248399 |
| 86  | 1 | 0 | -4.447234 | 5.429316  | -0.220789 |
| 87  | 6 | 0 | -0.503031 | 3.802128  | -3.943378 |
| 88  | 1 | 0 | -0.080720 | 1.763043  | -3.375404 |
| 89  | 6 | 0 | -1.260528 | 4.934857  | -3.655839 |
| 90  | 1 | 0 | -2.790241 | 5.798810  | -2.417465 |
| 91  | 6 | 0 | -2.029793 | 4.272051  | 2.040297  |
| 92  | 1 | 0 | -4.183671 | 4.169766  | 1.923494  |
| 93  | 1 | 0 | -3.564537 | 5.807983  | 2.034639  |
| 94  | 1 | 0 | 0.205489  | 3.804607  | -4.764502 |
| 95  | 1 | 0 | -1.155069 | 5.830470  | -4.259669 |
| 96  | 1 | 0 | -1.994211 | 4.203809  | 3.132676  |
| 97  | 1 | 0 | -1.851370 | 3.273953  | 1.631649  |
| 98  | 1 | 0 | -1.200898 | 4.912369  | 1.721424  |
| 99  | 6 | 0 | 6.542278  | -1.815116 | 0.747655  |
| 100 | 6 | 0 | 7.211858  | -2.693812 | 1.613017  |
| 101 | 6 | 0 | 7.073148  | -1.642132 | -0.542382 |
| 102 | 6 | 0 | 8.348569  | -3.385909 | 1.207769  |
| 103 | 1 | 0 | 6.859803  | -2.804159 | 2.633073  |
| 104 | 6 | 0 | 8.185580  | -2.360260 | -0.963549 |
| 105 | 1 | 0 | 6.592853  | -0.958610 | -1.233503 |
| 106 | 6 | 0 | 8.849836  | -3.244970 | -0.093716 |
| 107 | 1 | 0 | 8.859184  | -4.027748 | 1.915912  |

|     |    |   |           |           |           |
|-----|----|---|-----------|-----------|-----------|
| 108 | 16 | 0 | 8.752343  | -2.234906 | -2.648976 |
| 109 | 7  | 0 | 9.993247  | -3.937160 | -0.541001 |
| 110 | 6  | 0 | 10.500490 | -2.368490 | -2.332025 |
| 111 | 6  | 0 | 10.942832 | -3.242859 | -1.320969 |
| 112 | 6  | 0 | 10.356123 | -5.204066 | 0.092626  |
| 113 | 6  | 0 | 11.414607 | -1.665321 | -3.114599 |
| 114 | 6  | 0 | 12.322725 | -3.382028 | -1.117250 |
| 115 | 6  | 0 | 9.249008  | -6.258027 | -0.037690 |
| 116 | 1  | 0 | 11.240616 | -5.572669 | -0.430032 |
| 117 | 1  | 0 | 10.642830 | -5.068455 | 1.146305  |
| 118 | 6  | 0 | 12.785568 | -1.847686 | -2.931349 |
| 119 | 1  | 0 | 11.044356 | -0.988418 | -3.877979 |
| 120 | 6  | 0 | 13.233230 | -2.707262 | -1.930458 |
| 121 | 1  | 0 | 12.688376 | -4.013099 | -0.315636 |
| 122 | 6  | 0 | 8.875666  | -6.541147 | -1.493360 |
| 123 | 1  | 0 | 8.360472  | -5.940877 | 0.516770  |
| 124 | 1  | 0 | 9.610021  | -7.171795 | 0.450105  |
| 125 | 1  | 0 | 13.492622 | -1.314676 | -3.558302 |
| 126 | 1  | 0 | 14.296979 | -2.843390 | -1.762470 |
| 127 | 1  | 0 | 8.100512  | -7.310442 | -1.556251 |
| 128 | 1  | 0 | 8.501451  | -5.637946 | -1.982713 |
| 129 | 1  | 0 | 9.744535  | -6.890708 | -2.062428 |
| 130 | 6  | 0 | 5.116905  | 0.266688  | 0.596943  |
| 131 | 6  | 0 | 6.150312  | 1.212555  | 0.587539  |
| 132 | 6  | 0 | 3.880810  | 0.636443  | 0.045122  |
| 133 | 6  | 0 | 5.953959  | 2.492126  | 0.073613  |
| 134 | 1  | 0 | 7.116343  | 0.948649  | 1.004621  |

|     |    |   |           |           |           |
|-----|----|---|-----------|-----------|-----------|
| 135 | 6  | 0 | 3.687571  | 1.902206  | -0.492813 |
| 136 | 1  | 0 | 3.062609  | -0.074332 | 0.037907  |
| 137 | 6  | 0 | 4.722568  | 2.857585  | -0.485531 |
| 138 | 1  | 0 | 6.765494  | 3.209147  | 0.109059  |
| 139 | 16 | 0 | 2.143744  | 2.321026  | -1.275094 |
| 140 | 7  | 0 | 4.492285  | 4.135104  | -1.034860 |
| 141 | 6  | 0 | 2.074625  | 4.030731  | -0.778883 |
| 142 | 6  | 0 | 3.267197  | 4.778465  | -0.756169 |
| 143 | 6  | 0 | 5.618746  | 4.903707  | -1.561709 |
| 144 | 6  | 0 | 0.852539  | 4.630519  | -0.484188 |
| 145 | 6  | 0 | 3.194351  | 6.142225  | -0.439387 |
| 146 | 6  | 0 | 6.351068  | 4.164848  | -2.689648 |
| 147 | 1  | 0 | 5.201034  | 5.825317  | -1.971496 |
| 148 | 1  | 0 | 6.322826  | 5.198326  | -0.768872 |
| 149 | 6  | 0 | 0.789119  | 5.998293  | -0.218105 |
| 150 | 1  | 0 | -0.045370 | 4.027796  | -0.488350 |
| 151 | 6  | 0 | 1.961941  | 6.750025  | -0.198080 |
| 152 | 1  | 0 | 4.102895  | 6.729675  | -0.373979 |
| 153 | 6  | 0 | 5.423059  | 3.784028  | -3.843867 |
| 154 | 1  | 0 | 6.839948  | 3.267481  | -2.298203 |
| 155 | 1  | 0 | 7.152467  | 4.824741  | -3.043992 |
| 156 | 1  | 0 | -0.170792 | 6.466502  | -0.026044 |
| 157 | 1  | 0 | 1.928690  | 7.811896  | 0.025445  |
| 158 | 1  | 0 | 5.978383  | 3.284247  | -4.642955 |
| 159 | 1  | 0 | 4.633011  | 3.109860  | -3.502653 |
| 160 | 1  | 0 | 4.940437  | 4.670249  | -4.271232 |

Rotational constants (GHZ): 0.0254834 0.0077479 0.0072951

## 6. PTZ-Ph-(PTZ)<sub>2</sub>.

Standard orientation:

-----

| Center | Atomic | Atomic | Coordinates (Angstroms) |   |   |
|--------|--------|--------|-------------------------|---|---|
| Number | Number | Type   | X                       | Y | Z |

-----

|    |   |   |          |           |           |
|----|---|---|----------|-----------|-----------|
| 1  | 6 | 0 | 9.186066 | -3.659623 | 0.463373  |
| 2  | 6 | 0 | 7.832909 | -3.404034 | 0.664104  |
| 3  | 6 | 0 | 7.185877 | -2.448227 | -0.115761 |
| 4  | 6 | 0 | 7.891698 | -1.731268 | -1.087691 |
| 5  | 6 | 0 | 9.253099 | -1.987430 | -1.281986 |
| 6  | 6 | 0 | 9.895403 | -2.952904 | -0.511563 |
| 7  | 6 | 0 | 5.876093 | 0.048244  | -0.931812 |
| 8  | 6 | 0 | 5.394571 | -0.805335 | 0.065114  |
| 9  | 6 | 0 | 4.534360 | -0.316375 | 1.048050  |
| 10 | 1 | 0 | 4.188288 | -0.983514 | 1.827895  |
| 11 | 6 | 0 | 4.081857 | 0.996873  | 0.983354  |
| 12 | 6 | 0 | 5.426614 | 1.371753  | -0.988217 |
| 13 | 1 | 0 | 9.687312 | -4.408179 | 1.068094  |
| 14 | 1 | 0 | 7.241722 | -3.953728 | 1.386743  |
| 15 | 1 | 0 | 9.799097 | -1.425895 | -2.032937 |

|    |    |   |           |           |           |
|----|----|---|-----------|-----------|-----------|
| 16 | 1  | 0 | 10.951887 | -3.146939 | -0.666414 |
| 17 | 1  | 0 | 3.387187  | 1.361536  | 1.729927  |
| 18 | 1  | 0 | 5.805382  | 2.030773  | -1.762933 |
| 19 | 7  | 0 | 5.773476  | -2.209842 | 0.052157  |
| 20 | 16 | 0 | 7.048860  | -0.554847 | -2.126158 |
| 21 | 6  | 0 | 4.512673  | 1.836906  | -0.047147 |
| 22 | 1  | 0 | 4.157023  | 2.858456  | -0.100849 |
| 23 | 6  | 0 | 3.539450  | -3.023917 | 0.208242  |
| 24 | 6  | 0 | 2.765297  | -3.747806 | 1.136036  |
| 25 | 6  | 0 | 2.857075  | -2.204559 | -0.719453 |
| 26 | 6  | 0 | 1.387077  | -3.592019 | 1.192209  |
| 27 | 1  | 0 | 3.271741  | -4.429129 | 1.812241  |
| 28 | 6  | 0 | 1.480365  | -2.072498 | -0.677481 |
| 29 | 1  | 0 | 3.419359  | -1.675990 | -1.481500 |
| 30 | 6  | 0 | 0.713146  | -2.738889 | 0.299113  |
| 31 | 1  | 0 | 0.811653  | -4.145502 | 1.929554  |
| 32 | 1  | 0 | 0.981509  | -1.446485 | -1.407770 |
| 33 | 6  | 0 | 4.977665  | -3.263610 | 0.180139  |
| 34 | 6  | 0 | -0.746353 | -2.639358 | 0.348265  |
| 35 | 1  | 0 | -1.259342 | -3.544795 | 0.666965  |
| 36 | 6  | 0 | -1.514105 | -1.564488 | 0.040998  |
| 37 | 6  | 0 | -0.945435 | -0.200590 | -0.140662 |
| 38 | 6  | 0 | -1.160710 | 0.538737  | -1.309102 |

|    |    |   |           |           |           |
|----|----|---|-----------|-----------|-----------|
| 39 | 6  | 0 | -0.254456 | 0.414363  | 0.912971  |
| 40 | 6  | 0 | -0.686734 | 1.842018  | -1.431923 |
| 41 | 1  | 0 | -1.698925 | 0.085007  | -2.134870 |
| 42 | 6  | 0 | 0.149649  | 1.743116  | 0.823838  |
| 43 | 1  | 0 | -0.079541 | -0.139746 | 1.828806  |
| 44 | 6  | 0 | -0.052183 | 2.480805  | -0.356877 |
| 45 | 1  | 0 | -0.837141 | 2.376183  | -2.362167 |
| 46 | 16 | 0 | 0.782650  | 2.572502  | 2.269387  |
| 47 | 7  | 0 | 0.353438  | 3.827362  | -0.428214 |
| 48 | 6  | 0 | 1.881875  | 3.721339  | 1.470344  |
| 49 | 6  | 0 | 1.542107  | 4.238197  | 0.205192  |
| 50 | 6  | 0 | -0.346142 | 4.740763  | -1.334361 |
| 51 | 6  | 0 | 3.037978  | 4.143909  | 2.125663  |
| 52 | 6  | 0 | 2.415339  | 5.162402  | -0.388118 |
| 53 | 6  | 0 | -1.847361 | 4.836083  | -1.028423 |
| 54 | 1  | 0 | 0.095117  | 5.727366  | -1.184984 |
| 55 | 1  | 0 | -0.179510 | 4.474563  | -2.387953 |
| 56 | 6  | 0 | 3.868158  | 5.104001  | 1.547081  |
| 57 | 1  | 0 | 3.278527  | 3.721665  | 3.096165  |
| 58 | 6  | 0 | 3.553835  | 5.605693  | 0.285716  |
| 59 | 1  | 0 | 2.205266  | 5.534563  | -1.384054 |
| 60 | 6  | 0 | -2.129801 | 5.257579  | 0.413985  |
| 61 | 1  | 0 | -2.337653 | 3.880146  | -1.235782 |

|    |    |   |           |           |           |
|----|----|---|-----------|-----------|-----------|
| 62 | 1  | 0 | -2.274703 | 5.562469  | -1.730546 |
| 63 | 1  | 0 | 4.756901  | 5.439447  | 2.070433  |
| 64 | 1  | 0 | 4.202864  | 6.333540  | -0.190679 |
| 65 | 1  | 0 | -3.205441 | 5.346969  | 0.590917  |
| 66 | 1  | 0 | -1.729170 | 4.526151  | 1.121148  |
| 67 | 1  | 0 | -1.668505 | 6.225430  | 0.640795  |
| 68 | 6  | 0 | -2.986065 | -1.678421 | -0.040482 |
| 69 | 6  | 0 | -3.613639 | -2.873168 | -0.429488 |
| 70 | 6  | 0 | -3.810975 | -0.580857 | 0.262576  |
| 71 | 6  | 0 | -4.998573 | -2.979325 | -0.488359 |
| 72 | 1  | 0 | -3.006049 | -3.719325 | -0.731599 |
| 73 | 6  | 0 | -5.195657 | -0.693216 | 0.237596  |
| 74 | 1  | 0 | -3.364854 | 0.364396  | 0.549653  |
| 75 | 6  | 0 | -5.819091 | -1.896713 | -0.139922 |
| 76 | 1  | 0 | -5.445501 | -3.906871 | -0.826085 |
| 77 | 16 | 0 | -6.217506 | 0.670402  | 0.761096  |
| 78 | 7  | 0 | -7.225403 | -1.973738 | -0.178110 |
| 79 | 6  | 0 | -7.559724 | 0.428801  | -0.385438 |
| 80 | 6  | 0 | -7.948982 | -0.884723 | -0.709972 |
| 81 | 6  | 0 | -7.876761 | -3.273344 | -0.019060 |
| 82 | 6  | 0 | -8.250785 | 1.523672  | -0.901309 |
| 83 | 6  | 0 | -9.043460 | -1.062769 | -1.567489 |
| 84 | 6  | 0 | -7.525503 | -3.941541 | 1.316648  |

|    |   |   |            |           |           |
|----|---|---|------------|-----------|-----------|
| 85 | 1 | 0 | -8.952123  | -3.086711 | -0.034348 |
| 86 | 1 | 0 | -7.658342  | -3.947477 | -0.860897 |
| 87 | 6 | 0 | -9.365444  | 1.331686  | -1.718022 |
| 88 | 1 | 0 | -7.919890  | 2.524984  | -0.644538 |
| 89 | 6 | 0 | -9.756577  | 0.035751  | -2.047490 |
| 90 | 1 | 0 | -9.335741  | -2.061940 | -1.868694 |
| 91 | 6 | 0 | -7.880535  | -3.069671 | 2.521648  |
| 92 | 1 | 0 | -6.460920  | -4.193376 | 1.343642  |
| 93 | 1 | 0 | -8.070605  | -4.892502 | 1.357467  |
| 94 | 1 | 0 | -9.913203  | 2.187245  | -2.098855 |
| 95 | 1 | 0 | -10.609762 | -0.128764 | -2.698091 |
| 96 | 1 | 0 | -7.634649  | -3.578116 | 3.458495  |
| 97 | 1 | 0 | -7.334331  | -2.122950 | 2.492731  |
| 98 | 1 | 0 | -8.950675  | -2.834396 | 2.536947  |

-----  
Rotational constants (GHZ): 0.0710291 0.0209390 0.0173231

TDDFT calculation data of (PTZ)<sub>3</sub>, An(PTZ)<sub>2</sub>, An(TPE)<sub>2</sub>, (PTZ)<sub>4</sub>, (PTZ)<sub>5</sub> and PTZ-Ph-(PTZ)<sub>2</sub>

1 (PTZ)<sub>3</sub>

Excitation energies and oscillator strengths:

Excited State 1: Singlet-A 3.1702 eV 391.10 nm f=1.3402 <S\*\*2>=0.000  
209 -> 210 0.66225

This state for optimization and/or second-order correction.

Total Energy, E(TD-HF/TD-KS) = -3326.74925789

Copying the excited state density for this state as the 1-particle RhoCI density.

Excited State 2: Singlet-A 3.7598 eV 329.76 nm f=0.7733 <S\*\*2>=0.000

202 -> 210 0.11920

205 -> 210 -0.10015

207 -> 210 -0.15345

207 -> 211 -0.19896

208 -> 210 0.52074

208 -> 212 -0.12493

209 -> 211 -0.27128

Excited State 3: Singlet-A 3.9369 eV 314.93 nm f=0.0581 <S\*\*2>=0.000

206 -> 210 0.17471

206 -> 212 0.11530

207 -> 210 0.53750

208 -> 210 0.13682

208 -> 211 -0.21601

209 -> 212 -0.11830

209 -> 213 -0.10372

Excited State 4: Singlet-A 4.2204 eV 293.77 nm f=0.0977 <S\*\*2>=0.000

206 -> 210 0.43283

207 -> 211 -0.10222

207 -> 212 0.18652

207 -> 213 0.10171

208 -> 211 0.27961

208 -> 217 -0.10286

209 -> 212 0.14678

Excited State 5: Singlet-A 4.3425 eV 285.51 nm f=0.0591 <S\*\*2>=0.000

203 -> 210 -0.14147

204 -> 210 0.15080

207 -> 213 -0.15086

207 -> 214 -0.14456

207 -> 215 -0.13248

207 -> 218 -0.11120

208 -> 212 -0.13532

208 -> 213 -0.10057

209 -> 213 0.11186

209 -> 214 0.15307

209 -> 215 0.33441

209 -> 217 0.21240

209 -> 218 0.11993

Excited State 6: Singlet-A 4.3708 eV 283.66 nm f=0.0893 <S\*\*2>=0.000

202 -> 210 0.12221

207 -> 211 0.12702

207 -> 212 -0.22341

207 -> 217 -0.11222

208 -> 210 0.20452

208 -> 212 0.30160

208 -> 214 -0.10911

208 -> 215 -0.12308

208 -> 216 -0.11019  
209 -> 211 0.19044  
209 -> 213 0.18387  
209 -> 214 0.14409  
209 -> 216 -0.14747

Excited State 7: Singlet-A 4.4169 eV 280.71 nm f=0.0073 <S\*\*2>=0.000

205 -> 211 -0.13613  
206 -> 210 -0.23006  
207 -> 210 0.14653  
207 -> 212 0.14425  
207 -> 213 -0.13297  
208 -> 212 -0.12599  
208 -> 213 0.17031  
208 -> 215 -0.12934  
208 -> 216 -0.22420  
209 -> 212 0.24460  
209 -> 215 -0.11767  
209 -> 216 -0.18589  
209 -> 218 0.12894

Excited State 8: Singlet-A 4.5134 eV 274.70 nm f=0.1267 <S\*\*2>=0.000

202 -> 210 -0.12382  
204 -> 210 -0.14919  
204 -> 211 -0.10007  
205 -> 210 0.32150  
206 -> 211 0.16202

|            |          |
|------------|----------|
| 207 -> 211 | -0.15935 |
| 207 -> 213 | 0.12808  |
| 208 -> 213 | -0.17599 |
| 208 -> 216 | -0.14351 |
| 208 -> 217 | 0.11887  |
| 209 -> 211 | -0.10061 |
| 209 -> 213 | 0.11320  |
| 209 -> 216 | -0.15530 |

Excited State 9: Singlet-A 4.6124 eV 268.81 nm f=0.2161 <S\*\*2>=0.000

|            |          |
|------------|----------|
| 197 -> 210 | -0.15830 |
| 199 -> 210 | -0.13365 |
| 201 -> 210 | 0.12083  |
| 206 -> 211 | 0.16699  |
| 207 -> 210 | -0.14890 |
| 207 -> 217 | 0.12662  |
| 208 -> 210 | 0.11796  |
| 208 -> 217 | 0.11315  |
| 209 -> 211 | 0.36409  |
| 209 -> 213 | -0.12541 |
| 209 -> 214 | -0.15794 |
| 209 -> 215 | 0.10687  |

Excited State 10: Singlet-A 4.6546 eV 266.37 nm f=0.3928 <S\*\*2>=0.000

|            |          |
|------------|----------|
| 199 -> 210 | 0.10536  |
| 204 -> 210 | -0.11160 |
| 206 -> 211 | 0.13934  |

|            |          |
|------------|----------|
| 207 -> 214 | -0.18416 |
| 207 -> 215 | 0.14158  |
| 208 -> 210 | 0.21078  |
| 209 -> 211 | 0.32080  |
| 209 -> 212 | 0.10510  |
| 209 -> 215 | -0.12133 |
| 209 -> 216 | 0.25184  |
| 209 -> 217 | 0.10408  |

Excited State 11: Singlet-A 4.6849 eV 264.64 nm f=0.0060 <S\*\*2>=0.000

|            |          |
|------------|----------|
| 195 -> 211 | -0.11086 |
| 197 -> 210 | 0.35315  |
| 198 -> 210 | -0.17032 |
| 199 -> 210 | 0.16169  |
| 200 -> 210 | -0.10166 |
| 201 -> 210 | -0.22184 |
| 204 -> 210 | -0.12670 |
| 207 -> 214 | 0.11527  |
| 207 -> 215 | -0.13645 |
| 207 -> 216 | 0.10380  |
| 209 -> 211 | 0.10958  |
| 209 -> 215 | 0.19029  |
| 209 -> 216 | -0.10208 |

Excited State 12: Singlet-A 4.7027 eV 263.65 nm f=0.0344 <S\*\*2>=0.000

|            |          |
|------------|----------|
| 206 -> 210 | 0.16551  |
| 207 -> 213 | -0.14386 |

|            |          |
|------------|----------|
| 207 -> 214 | 0.12953  |
| 207 -> 216 | -0.15495 |
| 207 -> 218 | -0.12306 |
| 208 -> 213 | 0.12122  |
| 208 -> 214 | -0.13859 |
| 208 -> 216 | -0.15937 |
| 208 -> 217 | 0.27201  |
| 208 -> 218 | -0.12050 |
| 209 -> 213 | -0.11349 |
| 209 -> 214 | 0.12304  |
| 209 -> 215 | -0.14093 |
| 209 -> 217 | 0.18767  |

Excited State 13: Singlet-A 4.7361 eV 261.79 nm f=0.0084 <S\*\*2>=0.000

|            |          |
|------------|----------|
| 205 -> 210 | 0.19195  |
| 207 -> 213 | -0.14939 |
| 207 -> 214 | 0.18312  |
| 207 -> 217 | -0.14423 |
| 208 -> 213 | 0.13803  |
| 208 -> 214 | -0.18567 |
| 208 -> 216 | 0.13110  |
| 208 -> 217 | -0.10606 |
| 208 -> 218 | 0.19315  |
| 209 -> 213 | -0.10125 |
| 209 -> 214 | 0.11075  |
| 209 -> 217 | -0.14931 |

Excited State 14: Singlet-A 4.7991 eV 258.35 nm f=0.0339 <S\*\*2>=0.000

197 -> 210 0.20724

198 -> 210 -0.13299

204 -> 210 0.21231

207 -> 210 -0.22058

207 -> 219 -0.18891

208 -> 211 -0.13357

208 -> 220 -0.12968

209 -> 218 0.22772

Excited State 15: Singlet-A 4.9573 eV 250.10 nm f=0.0575 <S\*\*2>=0.000

195 -> 210 0.10070

203 -> 210 0.13756

206 -> 210 0.34740

207 -> 218 0.11163

207 -> 221 -0.10882

208 -> 211 -0.13390

208 -> 219 0.11272

209 -> 210 -0.13687

209 -> 219 -0.21847

209 -> 220 -0.18911

SavETr: write IOETrn= 770 NScale= 10 NData= 16 NLR=1 NState= 15 LETran=  
280.

## 2 An(PTZ)<sub>2</sub>

Excitation energies and oscillator strengths:

Excited State 1: Singlet-A 3.3064 eV 374.98 nm f=0.3481 <S\*\*2>=0.000

178 ->181 -0.28329

180 ->181 0.62838

This state for optimization and/or second-order correction.

Total Energy, E(TD-HF/TD-KS) = -2680.51835313

Copying the excited state density for this state as the 1-particle RhoCI density.

Excited State 2: Singlet-A 3.9751 eV 311.90 nm f=0.0389 <S\*\*2>=0.000

175 ->181 -0.32914

177 ->181 0.12928

178 ->181 0.37083

178 ->184 -0.10506

179 ->181 -0.16937

180 ->181 0.14659

180 ->182 -0.24876

180 ->183 -0.15858

180 ->184 0.12530

Excited State 3: Singlet-A 4.0194 eV 308.46 nm f=0.0350 <S\*\*2>=0.000

174 ->181 -0.19698

175 ->181 0.33098

177 ->181 0.10387

178 ->181 0.30055

178 ->182 -0.13395

178 ->183 -0.16527

178 ->185 -0.11967

179 ->184 -0.16079

|           |          |
|-----------|----------|
| 180 ->181 | 0.10835  |
| 180 ->182 | -0.14816 |
| 180 ->183 | 0.20238  |
| 180 ->184 | -0.18300 |
| 180 ->185 | 0.14662  |

Excited State 4: Singlet-A 4.0766 eV 304.14 nm f=0.1330 <S\*\*2>=0.000

|           |          |
|-----------|----------|
| 178 ->184 | 0.24565  |
| 179 ->181 | -0.38036 |
| 179 ->182 | 0.38350  |
| 180 ->184 | 0.15676  |
| 180 ->185 | 0.16057  |

Excited State 5: Singlet-A 4.1854 eV 296.23 nm f=0.0168 <S\*\*2>=0.000

|           |          |
|-----------|----------|
| 174 ->181 | -0.10720 |
| 177 ->181 | 0.11885  |
| 178 ->181 | 0.21469  |
| 178 ->188 | 0.10104  |
| 179 ->181 | -0.20149 |
| 179 ->183 | 0.12200  |
| 179 ->184 | 0.21769  |
| 179 ->185 | 0.10415  |
| 179 ->188 | -0.11388 |
| 180 ->181 | 0.16068  |
| 180 ->182 | 0.41848  |
| 180 ->184 | -0.12996 |

Excited State 6: Singlet-A 4.4028 eV 281.60 nm f=0.0526 <S\*\*2>=0.000

178 ->182 -0.36052

179 ->181 0.12084

179 ->182 0.13131

179 ->183 -0.10976

179 ->184 -0.15957

179 ->188 0.12559

180 ->182 0.39561

180 ->188 -0.16581

Excited State 7: Singlet-A 4.4704 eV 277.34 nm f=0.0707 <S\*\*2>=0.000

174 ->181 -0.10052

177 ->181 0.16206

178 ->181 0.13987

178 ->182 0.14872

178 ->183 0.17098

178 ->184 0.16968

179 ->181 0.24319

179 ->184 0.17980

179 ->188 0.23660

180 ->183 0.23116

180 ->184 0.16813

Excited State 8: Singlet-A 4.5354 eV 273.37 nm f=0.0070 <S\*\*2>=0.000

177 ->181 -0.24729

177 ->182 0.16381

178 ->182 -0.13516

|           |          |
|-----------|----------|
| 178 ->183 | 0.11044  |
| 178 ->185 | -0.17277 |
| 178 ->188 | 0.12394  |
| 179 ->181 | -0.15574 |
| 179 ->183 | 0.24746  |
| 179 ->185 | -0.24663 |
| 180 ->185 | -0.12949 |
| 180 ->188 | 0.15855  |
| 180 ->189 | 0.11290  |

Excited State 9: Singlet-A 4.6345 eV 267.53 nm f=0.0330 <S\*\*2>=0.000

|           |          |
|-----------|----------|
| 178 ->185 | 0.13644  |
| 179 ->181 | 0.32877  |
| 179 ->182 | 0.12320  |
| 179 ->183 | 0.16077  |
| 179 ->186 | 0.23352  |
| 180 ->183 | -0.21215 |
| 180 ->185 | 0.19737  |
| 180 ->188 | 0.16561  |

Excited State 10: Singlet-A 4.7197 eV 262.70 nm f=0.0898 <S\*\*2>=0.000

|           |          |
|-----------|----------|
| 178 ->182 | -0.11701 |
| 178 ->186 | 0.17231  |
| 178 ->187 | -0.15070 |
| 179 ->181 | 0.10533  |
| 179 ->182 | 0.12887  |
| 179 ->186 | -0.20320 |

|           |          |
|-----------|----------|
| 179 ->187 | 0.35910  |
| 179 ->189 | -0.11736 |
| 180 ->186 | 0.19532  |
| 180 ->187 | -0.22888 |
| 180 ->189 | 0.10353  |

Excited State 11: Singlet-A 4.7360 eV 261.79 nm f=0.0456 <S\*\*2>=0.000

|           |          |
|-----------|----------|
| 177 ->181 | -0.12782 |
| 178 ->185 | 0.10931  |
| 178 ->186 | 0.26183  |
| 178 ->187 | 0.20541  |
| 179 ->181 | -0.14948 |
| 179 ->182 | -0.10013 |
| 179 ->185 | 0.13356  |
| 179 ->186 | 0.28100  |
| 179 ->187 | 0.16100  |
| 179 ->189 | 0.11164  |
| 180 ->186 | 0.17621  |
| 180 ->187 | 0.16079  |

Excited State 12: Singlet-A 4.9606 eV 249.94 nm f=0.1932 <S\*\*2>=0.000

|           |          |
|-----------|----------|
| 177 ->181 | 0.37545  |
| 177 ->182 | -0.20265 |
| 178 ->181 | -0.20197 |
| 178 ->182 | -0.29220 |
| 179 ->182 | 0.10627  |
| 179 ->183 | 0.11007  |

179 ->188 -0.11799

180 ->181 -0.15278

Excited State 13: Singlet-A 5.0294 eV 246.52 nm f=0.0368 <S\*\*2>=0.000

174 ->181 -0.13326

177 ->181 0.30097

177 ->182 0.19311

178 ->181 -0.17729

178 ->182 0.21168

178 ->188 -0.10617

178 ->189 0.15293

179 ->182 -0.12169

179 ->184 -0.13351

179 ->185 -0.13631

179 ->187 0.10209

179 ->190 -0.14144

179 ->193 -0.10024

180 ->189 0.15475

Excited State 14: Singlet-A 5.0876 eV 243.70 nm f=0.4700 <S\*\*2>=0.000

176 ->181 -0.18391

176 ->182 0.23133

177 ->182 -0.11159

177 ->184 -0.22872

178 ->182 -0.19617

179 ->181 -0.11296

179 ->182 -0.18924

179 ->188 0.15343  
180 ->184 -0.10814  
180 ->190 0.15221

Excited State 15: Singlet-A 5.1327 eV 241.56 nm f=0.0135 <S\*\*2>=0.000

170 ->181 0.12096  
171 ->181 0.47572  
172 ->181 0.23444  
173 ->181 -0.29987  
178 ->190 0.10397  
178 ->191 -0.10125  
180 ->191 0.15766

SavETr: write IOETrn= 770 NScale= 10 NData= 16 NLR=1 NState= 15 LETran=  
280.

### 3 An(TPE)<sub>2</sub>

Excitation energies and oscillator strengths:

Excited State 1: Singlet-A 3.3231 eV 373.10 nm f=0.2502 <S\*\*2>=0.000

227 -> 229 -0.15759  
227 -> 230 -0.10154  
228 -> 229 0.65953

This state for optimization and/or second-order correction.

Total Energy, E(TD-HF/TD-KS) = -2618.55286702

Copying the excited state density for this state as the 1-particle RhoCI density.

Excited State 2: Singlet-A 3.9264 eV 315.77 nm f=1.1534 <S\*\*2>=0.000

226 -> 229 0.20256  
226 -> 230 -0.36787  
227 -> 229 -0.11321  
227 -> 230 0.12307  
227 -> 231 0.41180  
228 -> 231 0.30206

Excited State 3: Singlet-A 3.9425 eV 314.48 nm f=0.0473 <S\*\*2>=0.000

225 -> 229 0.11421  
226 -> 229 -0.18138  
226 -> 230 0.22357  
226 -> 231 -0.28139  
227 -> 229 -0.30006  
227 -> 230 0.15092  
227 -> 231 0.12669  
228 -> 230 0.37958

Excited State 4: Singlet-A 4.0106 eV 309.14 nm f=0.0065 <S\*\*2>=0.000

224 -> 229 0.46066  
224 -> 230 0.13677  
227 -> 231 0.11165  
227 -> 233 0.15361  
228 -> 233 -0.34982  
228 -> 234 0.11547  
228 -> 235 -0.16809

Excited State 5: Singlet-A 4.2298 eV 293.12 nm f=0.0099 <S\*\*2>=0.000

225 -> 229 -0.25863  
227 -> 229 0.48311  
228 -> 229 0.11665  
228 -> 230 0.31841  
228 -> 231 0.11668  
228 -> 232 -0.11210

Excited State 6: Singlet-A 4.2952 eV 288.66 nm f=0.1868 <S\*\*2>=0.000

225 -> 229 -0.12811  
226 -> 230 0.19317  
226 -> 231 -0.19896  
227 -> 230 0.31191  
227 -> 231 0.20517  
228 -> 229 0.11087  
228 -> 230 -0.28277  
228 -> 231 -0.12506  
228 -> 232 0.29959

Excited State 7: Singlet-A 4.6521 eV 266.51 nm f=0.0423 <S\*\*2>=0.000

223 -> 229 0.10089  
225 -> 229 -0.15988  
226 -> 229 0.49932  
226 -> 231 -0.10765  
226 -> 232 0.24160  
227 -> 229 -0.18483  
227 -> 231 -0.10316  
228 -> 231 -0.11726

Excited State 8: Singlet-A 4.7803 eV 259.36 nm f=0.0387 <S\*\*2>=0.000

|            |          |
|------------|----------|
| 225 -> 230 | 0.17839  |
| 225 -> 231 | -0.14394 |
| 226 -> 229 | -0.12413 |
| 226 -> 230 | 0.11273  |
| 226 -> 234 | -0.15482 |
| 227 -> 230 | -0.12823 |
| 227 -> 231 | -0.12612 |
| 228 -> 230 | -0.11150 |
| 228 -> 231 | 0.43431  |
| 228 -> 232 | 0.12155  |
| 228 -> 235 | -0.10217 |

Excited State 9: Singlet-A 4.7967 eV 258.48 nm f=0.0610 <S\*\*2>=0.000

|            |          |
|------------|----------|
| 223 -> 230 | 0.12484  |
| 223 -> 231 | 0.17519  |
| 225 -> 230 | 0.10942  |
| 225 -> 231 | 0.18179  |
| 226 -> 236 | -0.10345 |
| 227 -> 230 | -0.11000 |
| 227 -> 232 | 0.21517  |
| 227 -> 234 | 0.17113  |
| 227 -> 235 | 0.20309  |
| 227 -> 236 | 0.15988  |
| 228 -> 234 | 0.17440  |
| 228 -> 235 | 0.11692  |

228 -> 236 0.10085

Excited State 10: Singlet-A 4.8488 eV 255.70 nm f=0.0368 <S\*\*2>=0.000

212 -> 230 0.10034

219 -> 229 -0.10878

219 -> 230 0.12524

225 -> 231 -0.10424

226 -> 232 0.10247

226 -> 234 0.24988

227 -> 231 -0.10500

227 -> 232 -0.13405

227 -> 235 -0.10572

228 -> 231 0.21114

228 -> 233 0.14679

228 -> 234 0.17017

228 -> 235 -0.10639

Excited State 11: Singlet-A 4.9397 eV 250.99 nm f=0.3218 <S\*\*2>=0.000

226 -> 232 0.13004

226 -> 233 0.15579

226 -> 235 -0.15516

227 -> 230 -0.21433

227 -> 232 0.30262

227 -> 236 -0.18427

228 -> 232 0.18117

228 -> 236 -0.12536

Excited State 12: Singlet-A 4.9796 eV 248.98 nm f=0.0409 <S\*\*2>=0.000

|            |          |
|------------|----------|
| 225 -> 229 | 0.18171  |
| 226 -> 229 | -0.15036 |
| 226 -> 230 | -0.17186 |
| 226 -> 232 | 0.26293  |
| 226 -> 234 | -0.10263 |
| 226 -> 235 | -0.12959 |
| 226 -> 237 | -0.14605 |
| 227 -> 229 | 0.15492  |
| 227 -> 233 | 0.10248  |
| 227 -> 235 | -0.14951 |
| 228 -> 231 | -0.20247 |
| 228 -> 235 | -0.10042 |

Excited State 13: Singlet-A 5.0605 eV 245.01 nm f=0.0242 <S\*\*2>=0.000

|            |          |
|------------|----------|
| 220 -> 230 | 0.11338  |
| 221 -> 231 | 0.13094  |
| 223 -> 231 | -0.11624 |
| 225 -> 230 | 0.10408  |
| 225 -> 232 | -0.12207 |
| 226 -> 231 | -0.11571 |
| 226 -> 235 | 0.12971  |
| 226 -> 239 | -0.14044 |
| 227 -> 230 | -0.13145 |
| 227 -> 235 | -0.10723 |
| 227 -> 236 | -0.11456 |
| 227 -> 237 | 0.18499  |

227 -> 239 0.12053

Excited State 14: Singlet-A 5.0777 eV 244.18 nm f=0.0106 <S\*\*2>=0.000

219 -> 230 -0.17528

219 -> 231 0.14775

223 -> 230 0.10676

225 -> 229 0.23475

225 -> 230 -0.17276

226 -> 234 0.10446

226 -> 240 0.10475

226 -> 241 0.10553

227 -> 230 0.10845

228 -> 232 0.16531

Excited State 15: Singlet-A 5.0949 eV 243.35 nm f=0.0403 <S\*\*2>=0.000

219 -> 230 0.12604

220 -> 231 0.14667

221 -> 230 0.12516

221 -> 231 0.19718

225 -> 230 -0.11739

225 -> 234 -0.10540

226 -> 236 0.16003

227 -> 236 -0.15952

227 -> 238 0.10323

227 -> 242 0.11395

SavETr: write IOETrn= 770 NScale= 10 NData= 16 NLR=1 NState= 15 LETran=  
280.

#### 4 (PTZ)<sub>4</sub>

Excitation energies and oscillator strengths:

Excited State 1: Singlet-A 3.0666 eV 404.30 nm f=1.5677 <S\*\*2>=0.000  
279 -> 280 0.66779

This state for optimization and/or second-order correction.

Total Energy, E(TD-HF/TD-KS) = -4436.14229150

Copying the excited state density for this state as the 1-particle RhoCI density.

Excited State 2: Singlet-A 3.5784 eV 346.48 nm f=0.6285 <S\*\*2>=0.000  
270 -> 280 0.10244  
274 -> 280 -0.15591  
276 -> 281 0.12763  
277 -> 280 -0.10911  
278 -> 280 0.54427  
279 -> 281 0.26243

Excited State 3: Singlet-A 3.7839 eV 327.66 nm f=0.4010 <S\*\*2>=0.000  
269 -> 280 -0.11862  
277 -> 280 0.50857  
277 -> 281 -0.18285  
278 -> 280 0.21478  
278 -> 282 0.11587  
279 -> 281 -0.21024  
279 -> 282 -0.11403

Excited State 4: Singlet-A 3.9246 eV 315.92 nm f=0.1380 <S\*\*2>=0.000

|            |          |
|------------|----------|
| 275 -> 280 | -0.17294 |
| 275 -> 283 | -0.10091 |
| 276 -> 280 | 0.53736  |
| 276 -> 281 | 0.14810  |
| 278 -> 280 | -0.13246 |
| 278 -> 281 | 0.14954  |
| 278 -> 282 | -0.11397 |

Excited State 5: Singlet-A 4.1197 eV 300.95 nm f=0.0761 <S\*\*2>=0.000

|            |          |
|------------|----------|
| 274 -> 280 | 0.11060  |
| 275 -> 280 | 0.23941  |
| 276 -> 282 | -0.15058 |
| 277 -> 280 | 0.14156  |
| 277 -> 281 | -0.20123 |
| 278 -> 280 | -0.20235 |
| 278 -> 281 | 0.14013  |
| 278 -> 283 | -0.12439 |
| 279 -> 281 | 0.36654  |
| 279 -> 282 | -0.16553 |

Excited State 6: Singlet-A 4.1807 eV 296.56 nm f=0.0200 <S\*\*2>=0.000

|            |          |
|------------|----------|
| 275 -> 280 | 0.32494  |
| 276 -> 283 | -0.11989 |
| 277 -> 280 | -0.12461 |
| 277 -> 282 | -0.23313 |
| 277 -> 283 | 0.12456  |
| 278 -> 281 | 0.21555  |

278 -> 282 -0.10445

279 -> 281 -0.30579

Excited State 7: Singlet-A 4.2991 eV 288.39 nm f=0.0992 <S\*\*2>=0.000

271 -> 280 -0.11173

274 -> 280 0.22921

275 -> 281 0.14332

276 -> 281 0.14350

276 -> 286 -0.15888

277 -> 282 0.18565

278 -> 282 -0.12786

278 -> 283 -0.16314

279 -> 283 -0.18792

279 -> 287 -0.21192

Excited State 8: Singlet-A 4.3167 eV 287.22 nm f=0.0055 <S\*\*2>=0.000

275 -> 280 0.10491

276 -> 280 0.12842

276 -> 283 0.13309

277 -> 280 -0.24075

277 -> 281 -0.10678

277 -> 283 -0.10228

277 -> 285 -0.11914

277 -> 287 0.13348

277 -> 288 -0.10268

278 -> 281 -0.12612

278 -> 282 0.24329

278 -> 283 -0.13790  
278 -> 284 -0.10677  
278 -> 290 -0.11655  
278 -> 291 0.11103  
279 -> 281 -0.15377  
279 -> 282 -0.13446  
279 -> 287 -0.10705

Excited State 9: Singlet-A 4.3698 eV 283.73 nm f=0.1332 <S\*\*2>=0.000

266 -> 280 -0.10066  
272 -> 280 -0.10865  
275 -> 281 -0.14474  
276 -> 282 0.13994  
276 -> 283 0.20331  
276 -> 287 0.11603  
276 -> 290 -0.11397  
278 -> 283 0.20078  
278 -> 286 0.14565  
279 -> 281 0.17254  
279 -> 284 -0.13866  
279 -> 286 0.21166  
279 -> 287 -0.14025  
279 -> 289 -0.11909  
279 -> 291 0.11738

Excited State 10: Singlet-A 4.4155 eV 280.79 nm f=0.0443 <S\*\*2>=0.000

274 -> 281 0.12653

|            |          |
|------------|----------|
| 275 -> 280 | 0.22425  |
| 276 -> 280 | 0.14987  |
| 276 -> 284 | -0.10578 |
| 276 -> 286 | 0.10179  |
| 277 -> 285 | 0.30588  |
| 277 -> 290 | -0.11537 |
| 278 -> 284 | -0.10393 |
| 278 -> 285 | -0.14194 |
| 279 -> 282 | 0.12261  |
| 279 -> 283 | 0.10336  |
| 279 -> 285 | 0.23888  |
| 279 -> 290 | -0.12138 |

Excited State 11: Singlet-A 4.4586 eV 278.08 nm f=0.0252 <S\*\*2>=0.000

|            |          |
|------------|----------|
| 272 -> 281 | 0.12131  |
| 274 -> 280 | 0.32251  |
| 275 -> 281 | 0.14774  |
| 276 -> 281 | 0.10198  |
| 276 -> 284 | -0.18958 |
| 277 -> 285 | -0.18110 |
| 278 -> 283 | 0.12462  |
| 278 -> 284 | -0.17150 |
| 279 -> 283 | 0.14715  |
| 279 -> 284 | -0.11334 |
| 279 -> 285 | -0.16253 |

Excited State 12: Singlet-A 4.5739 eV 271.07 nm f=0.0221 <S\*\*2>=0.000

|            |          |
|------------|----------|
| 262 -> 280 | 0.18619  |
| 264 -> 280 | -0.10217 |
| 266 -> 280 | -0.12794 |
| 269 -> 280 | -0.14747 |
| 272 -> 280 | -0.15812 |
| 273 -> 280 | -0.12188 |
| 276 -> 280 | 0.20332  |
| 276 -> 286 | 0.12014  |
| 278 -> 281 | -0.11853 |
| 278 -> 284 | 0.15396  |
| 279 -> 284 | 0.15377  |
| 279 -> 287 | -0.12150 |

Excited State 13: Singlet-A 4.6113 eV 268.87 nm f=0.0724 <S\*\*2>=0.000

|            |          |
|------------|----------|
| 267 -> 280 | -0.10457 |
| 268 -> 280 | -0.12579 |
| 273 -> 280 | 0.29656  |
| 276 -> 280 | 0.12290  |
| 276 -> 289 | -0.11265 |
| 277 -> 289 | 0.17557  |
| 278 -> 289 | 0.24476  |
| 279 -> 286 | -0.12350 |
| 279 -> 289 | -0.12573 |

Excited State 14: Singlet-A 4.6773 eV 265.07 nm f=0.0416 <S\*\*2>=0.000

|            |          |
|------------|----------|
| 262 -> 280 | 0.17207  |
| 263 -> 280 | -0.12783 |

|            |          |
|------------|----------|
| 275 -> 280 | 0.16971  |
| 275 -> 288 | 0.14588  |
| 276 -> 287 | -0.18483 |
| 276 -> 288 | -0.16747 |
| 277 -> 287 | -0.11907 |
| 279 -> 286 | 0.10180  |
| 279 -> 287 | 0.19459  |
| 279 -> 288 | 0.25238  |

Excited State 15: Singlet-A 4.7035 eV 263.60 nm f=0.0287 <S\*\*2>=0.000

|            |          |
|------------|----------|
| 262 -> 280 | -0.17226 |
| 275 -> 285 | -0.10048 |
| 277 -> 285 | -0.18082 |
| 277 -> 287 | -0.20128 |
| 277 -> 288 | 0.27816  |
| 277 -> 290 | -0.15600 |
| 278 -> 288 | -0.10835 |
| 279 -> 285 | -0.11240 |
| 279 -> 287 | -0.12570 |
| 279 -> 288 | 0.11501  |
| 279 -> 290 | -0.14145 |

SavETr: write IOETrn= 770 NScale= 10 NData= 16 NLR=1 NState= 15 LETran= 280.

## 5 (PTZ)<sub>5</sub>

Excitation energies and oscillator strengths:

Excited State 1: Singlet-A 3.4705 eV 357.25 nm f=1.2012 <S\*\*2>=0.000

325 -> 332 -0.13232

329 -> 332 0.24922

330 -> 331 0.59926

This state for optimization and/or second-order correction.

Total Energy, E(TD-HF/TD-KS) = -5315.93964017

Copying the excited state density for this state as the 1-particle RhoCI density.

Excited State 2: Singlet-A 3.8412 eV 322.78 nm f=0.3359 <S\*\*2>=0.000

325 -> 331 -0.12316

327 -> 335 0.10978

328 -> 336 0.11629

329 -> 331 0.39052

330 -> 332 0.50920

Excited State 3: Singlet-A 4.0960 eV 302.70 nm f=0.1737 <S\*\*2>=0.000

326 -> 331 0.25683

326 -> 336 -0.15315

327 -> 331 0.21473

327 -> 332 0.11819

328 -> 331 0.15138

328 -> 332 -0.24653

329 -> 332 0.19218

329 -> 335 0.13726

329 -> 336 0.17505

330 -> 335 0.10235

330 -> 336 -0.11905

Excited State 4: Singlet-A 4.1070 eV 301.88 nm f=0.1399 <S\*\*2>=0.000

|            |          |
|------------|----------|
| 326 -> 331 | -0.10017 |
| 326 -> 336 | -0.12394 |
| 327 -> 331 | -0.16386 |
| 327 -> 332 | -0.16600 |
| 328 -> 331 | 0.28412  |
| 328 -> 332 | -0.24502 |
| 328 -> 334 | 0.12190  |
| 328 -> 336 | 0.14762  |
| 329 -> 332 | -0.15311 |
| 329 -> 335 | -0.12658 |
| 329 -> 336 | 0.19126  |
| 330 -> 335 | -0.10175 |
| 330 -> 336 | -0.12150 |

Excited State 5: Singlet-A 4.1302 eV 300.19 nm f=0.0533 <S\*\*2>=0.000

|            |          |
|------------|----------|
| 326 -> 331 | 0.26197  |
| 326 -> 335 | -0.15068 |
| 327 -> 331 | -0.23403 |
| 327 -> 332 | -0.22625 |
| 327 -> 333 | -0.15485 |
| 327 -> 335 | 0.17118  |
| 328 -> 336 | -0.14537 |
| 329 -> 332 | 0.20179  |
| 329 -> 335 | -0.16615 |
| 330 -> 333 | 0.11554  |

330 -> 335 -0.11511

Excited State 6: Singlet-A 4.2816 eV 289.58 nm f=0.0679 <S\*\*2>=0.000

325 -> 331 0.15675

326 -> 332 0.32338

327 -> 335 0.22097

328 -> 336 0.22413

329 -> 331 0.13655

329 -> 333 0.11067

330 -> 332 -0.26187

Excited State 7: Singlet-A 4.3567 eV 284.58 nm f=0.0136 <S\*\*2>=0.000

324 -> 332 -0.10614

326 -> 331 -0.10915

326 -> 332 -0.12511

327 -> 333 -0.14740

329 -> 331 -0.12865

329 -> 333 0.23995

330 -> 333 0.33320

330 -> 334 -0.13833

330 -> 339 -0.12188

330 -> 341 -0.15538

Excited State 8: Singlet-A 4.3824 eV 282.91 nm f=0.0910 <S\*\*2>=0.000

321 -> 331 0.10116

324 -> 331 -0.12352

326 -> 331 -0.14417

326 -> 342 0.11639  
329 -> 334 -0.21627  
330 -> 333 0.11955  
330 -> 334 0.32766  
330 -> 342 -0.21967  
330 -> 345 0.13893

Excited State 9: Singlet-A 4.4185 eV 280.60 nm f=0.2569 <S\*\*2>=0.000

325 -> 332 -0.11790  
326 -> 333 -0.17819  
326 -> 334 -0.12227  
326 -> 337 -0.10368  
327 -> 335 -0.13147  
328 -> 334 0.13770  
328 -> 336 0.13776  
328 -> 346 0.10835  
329 -> 332 0.10921  
329 -> 333 -0.11715  
329 -> 334 0.18010  
329 -> 339 -0.10262  
330 -> 339 -0.13017  
330 -> 341 -0.12096  
330 -> 342 -0.19188  
330 -> 345 0.16931

Excited State 10: Singlet-A 4.4790 eV 276.81 nm f=0.0306 <S\*\*2>=0.000

327 -> 331 -0.17045

|            |          |
|------------|----------|
| 327 -> 332 | -0.12532 |
| 327 -> 333 | 0.30509  |
| 327 -> 339 | 0.16725  |
| 329 -> 333 | 0.10898  |
| 329 -> 335 | 0.11317  |
| 329 -> 339 | 0.15845  |
| 329 -> 344 | 0.13810  |
| 330 -> 339 | 0.16342  |
| 330 -> 344 | 0.10443  |

Excited State 11: Singlet-A 4.4939 eV 275.90 nm f=0.0157 <S\*\*2>=0.000

|            |          |
|------------|----------|
| 325 -> 331 | 0.10332  |
| 326 -> 334 | 0.15098  |
| 328 -> 331 | -0.10189 |
| 328 -> 334 | 0.21929  |
| 328 -> 340 | -0.14253 |
| 328 -> 342 | 0.10006  |
| 329 -> 334 | -0.14131 |
| 329 -> 336 | 0.11088  |
| 329 -> 338 | -0.10986 |
| 329 -> 340 | 0.10994  |
| 329 -> 342 | -0.12425 |
| 330 -> 338 | 0.10743  |
| 330 -> 340 | -0.13840 |
| 330 -> 342 | 0.13478  |

Excited State 12: Singlet-A 4.5364 eV 273.31 nm f=0.1053 <S\*\*2>=0.000

|            |          |
|------------|----------|
| 324 -> 332 | 0.12674  |
| 325 -> 331 | -0.12099 |
| 326 -> 333 | 0.11507  |
| 327 -> 333 | -0.12646 |
| 327 -> 335 | -0.10831 |
| 328 -> 331 | -0.10863 |
| 328 -> 332 | 0.10001  |
| 328 -> 334 | 0.24892  |
| 329 -> 345 | -0.11959 |
| 330 -> 339 | 0.10925  |
| 330 -> 341 | 0.16420  |
| 330 -> 344 | -0.10450 |
| 330 -> 346 | -0.20922 |

Excited State 13: Singlet-A 4.5654 eV 271.57 nm f=0.3900 <S\*\*2>=0.000

|            |          |
|------------|----------|
| 324 -> 331 | 0.30693  |
| 325 -> 332 | -0.17971 |
| 326 -> 337 | -0.11456 |
| 327 -> 335 | -0.17228 |
| 328 -> 334 | -0.14536 |
| 328 -> 336 | 0.14206  |
| 329 -> 338 | -0.10723 |
| 329 -> 346 | -0.12892 |
| 330 -> 345 | -0.10346 |
| 330 -> 349 | -0.12067 |

Excited State 14: Singlet-A 4.6694 eV 265.53 nm f=0.0210 <S\*\*2>=0.000

|            |          |
|------------|----------|
| 326 -> 332 | 0.19027  |
| 326 -> 338 | -0.22097 |
| 327 -> 335 | -0.12101 |
| 327 -> 339 | 0.10109  |
| 328 -> 336 | -0.13404 |
| 329 -> 331 | 0.27996  |
| 329 -> 337 | -0.21317 |
| 330 -> 332 | -0.17523 |
| 330 -> 334 | -0.10281 |

Excited State 15: Singlet-A 4.6894 eV 264.39 nm f=0.1015 <S\*\*2>=0.000

|            |          |
|------------|----------|
| 326 -> 339 | -0.16530 |
| 327 -> 331 | -0.12758 |
| 327 -> 333 | -0.10512 |
| 327 -> 335 | -0.11395 |
| 327 -> 337 | 0.28710  |
| 327 -> 338 | 0.22294  |
| 327 -> 339 | 0.10090  |
| 329 -> 339 | -0.18463 |
| 329 -> 341 | 0.13586  |
| 330 -> 339 | -0.11515 |

SavETr: write IOETrn= 770 NScale= 10 NData= 16 NLR=1 NState= 15 LETran=  
280.

### 6 PTZ-Ph-(PTZ)<sub>2</sub>

Excitation energies and oscillator strengths:

Excited State 1: Singlet-A 2.6173 eV 473.70 nm f=0.2211 <S\*\*2>=0.000

204 -> 209 -0.14988

204 -> 210 -0.12002

206 -> 209 0.37107

206 -> 210 0.20413

208 -> 209 0.42126

208 -> 210 0.15285

This state for optimization and/or second-order correction.

Total Energy, E(TD-HF/TD-KS) = -3325.61744030

Copying the excited state density for this state as the 1-particle RhoCI density.

Excited State 2: Singlet-A 3.6557 eV 339.15 nm f=0.9049 <S\*\*2>=0.000

202 -> 209 0.14115

204 -> 209 0.20709

205 -> 209 -0.13445

206 -> 209 -0.16677

208 -> 209 0.47913

208 -> 210 -0.30292

Excited State 3: Singlet-A 4.0077 eV 309.36 nm f=0.1836 <S\*\*2>=0.000

206 -> 213 -0.12992

207 -> 209 0.44124

207 -> 210 -0.25993

207 -> 211 -0.14879

207 -> 212 -0.19304

208 -> 211 0.11877

208 -> 212 0.16652

208 -> 213 0.16519

Excited State 4: Singlet-A 4.2289 eV 293.18 nm f=0.1651 <S\*\*2>=0.000

202 -> 209 -0.10120

204 -> 209 -0.15758

205 -> 209 0.16836

206 -> 209 -0.24816

206 -> 210 0.25247

206 -> 213 -0.13334

207 -> 211 0.16336

207 -> 212 0.21601

207 -> 213 0.18515

208 -> 211 -0.12289

208 -> 213 0.14027

208 -> 215 -0.11325

Excited State 5: Singlet-A 4.4352 eV 279.55 nm f=0.0786 <S\*\*2>=0.000

206 -> 209 0.25848

206 -> 210 -0.18166

207 -> 209 0.21616

207 -> 211 0.12099

207 -> 216 -0.10122

207 -> 218 -0.13951

207 -> 219 -0.10980

208 -> 210 -0.21093

208 -> 211 -0.24741

208 -> 213 0.15395

208 -> 214 -0.16307

Excited State 6: Singlet-A 4.4552 eV 278.29 nm f=0.0689 <S\*\*2>=0.000

206 -> 213 0.15046

206 -> 218 -0.14836

206 -> 219 -0.11051

207 -> 209 0.27845

207 -> 211 0.18942

207 -> 212 0.15612

207 -> 214 0.10888

207 -> 215 0.14496

208 -> 213 -0.27792

208 -> 218 0.17795

208 -> 219 0.13763

Excited State 7: Singlet-A 4.4978 eV 275.65 nm f=0.0389 <S\*\*2>=0.000

205 -> 209 0.36831

205 -> 210 0.18457

206 -> 209 0.10758

206 -> 210 -0.19090

208 -> 210 -0.32782

208 -> 211 0.12629

208 -> 213 -0.11704

Excited State 8: Singlet-A 4.5267 eV 273.90 nm f=0.0264 <S\*\*2>=0.000

199 -> 209 -0.11988

200 -> 209 0.14686

|            |          |
|------------|----------|
| 201 -> 209 | 0.29497  |
| 205 -> 209 | -0.16430 |
| 206 -> 211 | 0.19122  |
| 206 -> 220 | 0.15232  |
| 207 -> 209 | 0.10584  |
| 207 -> 213 | 0.12737  |
| 208 -> 211 | 0.16761  |
| 208 -> 212 | -0.11669 |
| 208 -> 218 | -0.17751 |
| 208 -> 220 | 0.20602  |
| 208 -> 222 | -0.12474 |

Excited State 9: Singlet-A 4.5901 eV 270.11 nm f=0.0327 <S\*\*2>=0.000

|            |          |
|------------|----------|
| 204 -> 209 | -0.11672 |
| 205 -> 209 | -0.22084 |
| 205 -> 210 | -0.15660 |
| 206 -> 209 | 0.11775  |
| 207 -> 211 | -0.11026 |
| 207 -> 213 | 0.28520  |
| 207 -> 215 | 0.18121  |
| 208 -> 213 | -0.12706 |
| 208 -> 214 | 0.12910  |
| 208 -> 215 | -0.11323 |
| 208 -> 220 | -0.15758 |
| 208 -> 222 | 0.10134  |

Excited State 10: Singlet-A 4.6408 eV 267.16 nm f=0.1143 <S\*\*2>=0.000

|            |          |
|------------|----------|
| 204 -> 209 | 0.17860  |
| 205 -> 209 | 0.13918  |
| 205 -> 210 | 0.12025  |
| 206 -> 209 | -0.13038 |
| 206 -> 216 | 0.23860  |
| 207 -> 209 | 0.10518  |
| 207 -> 215 | 0.34187  |
| 208 -> 210 | 0.12770  |
| 208 -> 215 | -0.14166 |
| 208 -> 216 | -0.21140 |

Excited State 11: Singlet-A 4.6917 eV 264.26 nm f=0.0248 <S\*\*2>=0.000

|            |          |
|------------|----------|
| 206 -> 215 | 0.10572  |
| 206 -> 216 | -0.21029 |
| 207 -> 209 | -0.14496 |
| 207 -> 215 | 0.26945  |
| 207 -> 216 | 0.22708  |
| 207 -> 218 | -0.20516 |
| 208 -> 215 | -0.18466 |
| 208 -> 216 | 0.18926  |
| 208 -> 218 | 0.12968  |

Excited State 12: Singlet-A 4.7466 eV 261.20 nm f=0.0700 <S\*\*2>=0.000

|            |         |
|------------|---------|
| 202 -> 209 | 0.10126 |
| 204 -> 209 | 0.28002 |
| 205 -> 209 | 0.14082 |
| 205 -> 210 | 0.14339 |

|            |          |
|------------|----------|
| 206 -> 216 | -0.16485 |
| 206 -> 219 | 0.14700  |
| 207 -> 209 | 0.21577  |
| 207 -> 215 | -0.10131 |
| 207 -> 218 | 0.10950  |
| 207 -> 219 | -0.10798 |
| 208 -> 210 | 0.15896  |
| 208 -> 216 | 0.17102  |
| 208 -> 218 | -0.13381 |
| 208 -> 219 | -0.11453 |

Excited State 13: Singlet-A 4.8781 eV 254.17 nm f=0.0263 <S\*\*2>=0.000

|            |          |
|------------|----------|
| 201 -> 209 | 0.14778  |
| 204 -> 211 | 0.11605  |
| 204 -> 212 | -0.13546 |
| 205 -> 211 | 0.15032  |
| 205 -> 212 | -0.18736 |
| 205 -> 223 | -0.11151 |
| 206 -> 211 | -0.18848 |
| 206 -> 212 | 0.24326  |
| 206 -> 213 | -0.10967 |
| 208 -> 211 | -0.22203 |
| 208 -> 212 | 0.31479  |

Excited State 14: Singlet-A 4.9119 eV 252.42 nm f=0.0691 <S\*\*2>=0.000

|            |          |
|------------|----------|
| 200 -> 209 | -0.14263 |
| 201 -> 209 | 0.12376  |

|            |          |
|------------|----------|
| 202 -> 209 | 0.13043  |
| 203 -> 209 | -0.20739 |
| 204 -> 210 | 0.11809  |
| 204 -> 213 | -0.11675 |
| 206 -> 209 | 0.23399  |
| 206 -> 219 | -0.11389 |
| 206 -> 220 | 0.10105  |
| 207 -> 213 | 0.11476  |
| 208 -> 219 | 0.15105  |
| 208 -> 220 | -0.13143 |

Excited State 15: Singlet-A 5.0209 eV 246.94 nm f=0.0228 <S\*\*2>=0.000

|            |          |
|------------|----------|
| 204 -> 210 | -0.12997 |
| 205 -> 211 | 0.19516  |
| 205 -> 212 | -0.22980 |
| 205 -> 223 | -0.10124 |
| 206 -> 212 | -0.12748 |
| 206 -> 214 | 0.21068  |
| 208 -> 210 | -0.10861 |
| 208 -> 214 | 0.32113  |

SavETr: write IOETrn= 770 NScale= 10 NData= 16 NLR=1 NState= 15 LETran=  
280.

## References

- 1 A. Sillen and Y. Engelborghs, *Photochem. Photobiol.*, 1998, 67, 475–486.
